# Supplementary material
Source: PubMed Central journal article supplement (PMC3924867)
Supplement: NIHMS527376-supplement-Supp_Table_S1.pdf [file NIHMS527376-supplement-Supp_Table_S1.pdf]

Supplemental Table 1. Expression data

| Gene Symbol   |                            |           |        |        | Expression data   log <sub>2</sub> intensity values |        |        |        |        |        |        |        |        |        |        |        |        |        |        |        |        | Statistical Analyses: |           |         |           |         |         |         |         |         |                |          |          |  |  |  |
|---------------|----------------------------|-----------|--------|--------|-----------------------------------------------------|--------|--------|--------|--------|--------|--------|--------|--------|--------|--------|--------|--------|--------|--------|--------|--------|-----------------------|-----------|---------|-----------|---------|---------|---------|---------|---------|----------------|----------|----------|--|--|--|
|               |                            |           |        |        | BECs                                                |        |        |        |        |        |        |        |        |        |        |        |        |        |        |        |        | BEC   Intensity       |           |         |           |         |         |         |         |         |                |          |          |  |  |  |
|               |                            |           |        |        | 1.2                                                 | 2.1    | 2.4    | 1.8    | 1.3    | 0.7    | 1.3    | 0.9    | 1.9    | 1.1    |        |        |        |        |        |        |        |                       |           |         |           |         |         |         |         |         |                |          |          |  |  |  |
| Name          | Accession #                | Ch        | P30_C1 | P30_C2 | P30_C3                                              | P30_C4 | P30_C5 | P70_C1 | P70_C2 | P70_C3 | P70_C4 | P70_C5 | P30_E1 | P30_E2 | P30_E3 | P30_E4 | P30_E5 | P70_E1 | P70_E2 | P70_E3 | P70_E4 | P70_E5                | P30_CvE_P | P30_FDR | P70_CvE_P | P70_FDR | P30Cv_P | Age FDR | CvE_P   | CvE_FDR | r <sup>2</sup> | t        |          |  |  |  |
| 0610000608R1K | RIKEN cDNA 0610000608 gene | BG076213  | 19     | 7.851  | 8.217                                               | 8.586  | 7.634  | 7.037  | 9.523  | 7.793  | 7.459  | 7.496  | 8.872  | 7.858  | 7.933  | 8.025  | 8.497  | 7.912  | 8.012  | 8.448  | 7.672  | 7.48                  | 8.316     | 0.54866 | 0.46556   | 0.54172 | 0.29881 | 0.26882 | 0.01439 | 0.84430 | 0.73796        | 0.00063  | -0.07097 |  |  |  |
| 0610007021R1K | RIKEN cDNA 0610007021 gene | BG193774  | 5      | 8.584  | 8.729                                               | 8.055  | 8.654  | 8.883  | 8.369  | 7.488  | 8.238  | 7.807  | 8.274  | 8.264  | 8.865  | 8.577  | 8.282  | 8.261  | 8.133  | 8.551  | 8.279  | 8.687                 | 0.75752   | 0.51062 | 0.07043   | 0.19863 | 0.03703 | 0.03981 | 0.21888 | 0.51874 | 0.33003        | 1.98514  |          |  |  |  |
| 0610007101R1K | RIKEN cDNA 0610007101 gene | A4453902  | 5      | 8.226  | 8.368                                               | 8.369  | 7.905  | 9.212  | 8.727  | 8.536  | 8.253  | 9.084  | 8.961  | 8.088  | 8.18   | 8.78   | 8.228  | 7.991  | 7.812  | 8.374  | 7.978  | 8.17                  | 8.284     | 0.54369 | 0.46455   | 0.01184 | 0.18079 | 0.29541 | 0.01650 | 0.02853 | 0.40715        | 0.30023  | 1.85367  |  |  |  |
| 0610007191R1K | RIKEN cDNA 0610007191 gene | BQ553443  | 15     | 5.61   | 5.732                                               | 4.976  | 5.251  | 4.412  | 6.432  | 6.888  | 6.337  | 8.297  | 4.444  | 5.067  | 5.283  | 6.332  | 3.52   | 5.109  | 5.103  | 5.37   | 5.341  | 4.248                 | 5.957     | 0.79872 | 0.51971   | 0.09634 | 0.20515 | 0.08847 | 0.05521 | 0.13749 | 0.47530        | 0.13634  | 1.25110  |  |  |  |
| 0610007808R1K | RIKEN cDNA 0610007808 gene | BQ655531  | 13     | 7.493  | 7.37                                                | 7.973  | 8.085  | 7.424  | 7.374  | 6.745  | 6.87   | 7.31   | 7.734  | 7.4    | 7.539  | 7.87   | 7.531  | 7.22   | 7.665  | 7.7    | 8.438  | 8.198                 | 8.315     | 0.41695 | 0.49866   | 0.00652 | 0.17849 | 0.07336 | 0.07371 | 0.07187 | 0.43730        | 0.05676  | 0.70669  |  |  |  |
| 0610007914R1K | RIKEN cDNA 0610007914 gene | A1851047  | 12     | 6.333  | 7.688                                               | 7.079  | 7.748  | 6.64   | 8.103  | 10.287 | 7.738  | 7.563  | 7.732  | 7.126  | 7.024  | 6.94   | 7.873  | 7.573  | 7.05   | 7.361  | 7.353  | 7.473                 | 7.591     | 0.55218 | 0.46628   | 0.11290 | 0.20913 | 0.07572 | 0.06971 | 0.32229 | 0.56787        | 0.00648  | 0.22839  |  |  |  |
| 0610007922R1K | RIKEN cDNA 0610007922 gene | BQ6560834 | 17     | 8.369  | 7.776                                               | 8.115  | 8.896  | 8.19   | 8.616  | 8.724  | 8.555  | 8.41   | 7.981  | 7.975  | 8.726  | 7.943  | 8.488  | 8.154  | 8.015  | 7.704  | 8.011  | 8.495                 | 8.1       | 0.96112 | 0.55624   | 0.18381 | 0.22539 | 0.42735 | 0.01438 | 0.32724 | 0.57023        | 0.00185  | 0.12182  |  |  |  |
| 0610009822R1K | RIKEN cDNA 0610009822 gene | A1846803  | 11     | 7.748  | 8.831                                               | 7.694  | 9.276  | 7.873  | 7.568  | 8.854  | 8.139  | 7.454  | 7.7    | 7.831  | 8.158  | 7.461  | 6.951  | 7.693  | 6.278  | 8.169  | 6.999  | 7.964                 | 7.862     | 0.11859 | 0.40901   | 0.30229 | 0.25103 | 0.43132 | 0.01435 | 0.05578 | 0.42687        | 0.05403  | -0.67597 |  |  |  |
| 0610009807R1K | RIKEN cDNA 0610009807 gene | BG076503  | 12     | 7.469  | 6.682                                               | 7.492  | 7.378  | 7.399  | 7.32   | 7.62   | 6.801  | 7.276  | 7.507  | 7.908  | 7.68   | 7.436  | 6.735  | 7.385  | 7.831  | 7.966  | 6.335  | 7.142                 | 7.038     | 0.53966 | 0.46373   | 0.66804 | 0.32377 | 0.89938 | 0.01332 | 0.06464 | 0.62854        | 0.00138  | -0.10519 |  |  |  |
| 0610010E21R1K | RIKEN cDNA 0610010E21 gene | A1843605  | 7      | 6.49   | 5.961                                               | 6.911  | 6.521  | 6.744  | 6.988  | 6.44   | 4.159  | 5.481  | 5.988  | 7.639  | 6.478  | 3.422  | 5.952  | 6.035  | 6.73   | 5.34   | 6.013  | 6.19                  | 6.871     | 0.40680 | 0.43799   | 0.47305 | 0.28541 | 0.19759 | 0.02090 | 0.82201 | 0.73316        | 0.02782  | 0.47850  |  |  |  |
| 0610010F05R1K | RIKEN cDNA 0610010F05 gene | BQ554991  | 11     | 6.517  | 6.731                                               | 6.886  | 6.666  | 6.285  |        | 8.395  | 6.128  | 7.163  | 6.382  | 7.621  | 6.897  | 7.011  | 6.204  | 7.25   | 6.276  | 6.341  | 7.281  | 6.178                 | 7.19      | 0.26184 | 0.41490   | 0.50943 | 0.29251 | 0.49209 | 0.01390 | 0.99021 | 0.76674        | 0.03665  | 0.55169  |  |  |  |
| 0610010K06R1K | RIKEN cDNA 0610010K06 gene | A1666571  | 1      | 9.537  | 9.762                                               | 9.95   | 9.288  | 9.679  | 10.128 | 9.907  | 9.601  | 9.081  | 10.253 | 9.638  | 9.823  | 9.632  | 9.639  | 9.704  | 9.412  | 9.503  | 9.561  | 9.235                 | 9.308     | 0.27650 | 0.50148   | 0.11164 | 0.20883 | 0.54310 | 0.01366 | 0.19437 | 0.50559        | 0.14700  | 1.17416  |  |  |  |
| 0610010K14R1K | RIKEN cDNA 0610010K14 gene | BG064261  | 11     | 8.808  | 9.011                                               | 8.17   | 8.472  | 8.456  | 8.931  | 8.418  | 8.633  | 8.779  | 8.9    | 8.732  | 8.861  | 8.612  | 9.3    | 8.589  | 7.616  | 8.429  | 8.038  | 8.519                 | 8.656     | 0.21647 | 0.41520   | 0.05269 | 0.19398 | 0.41943 | 0.01446 | 0.47349 | 0.63194        | 0.15238  | 1.19925  |  |  |  |
| 0610010O12R1K | RIKEN cDNA 0610010O12 gene | A1836601  | 18     | 10.987 | 10.684                                              | 10.294 | 10.599 | 11.1   |        | 10.833 | 11.192 | 10.952 | 11.118 | 10.45  | 12.065 | 11.104 | 10.979 | 10.788 | 10.813 | 10.628 | 11.023 | 10.958                | 10.66     | 0.31040 | 0.42146   | 0.11121 | 0.20872 | 0.14551 | 0.02801 | 0.65716 | 0.69284        | 0.04329  | 0.60163  |  |  |  |
| 0610011F06R1K | RIKEN cDNA 0610011F06 gene | BG070867  | 17     | 8.114  | 7.539                                               | 6.909  | 7.295  | 7.257  | 6.257  | 8.725  | 7.168  | 7.379  | 7.312  | 6.778  | 7.325  | 7.142  | 7.473  | 7.069  | 6.555  | 8.825  | 7.218  | 7.313                 | 6.716     | 0.35200 | 0.42820   | 0.94129 | 0.37995 | 0.90487 | 0.01339 | 0.64040 | 0.68805        | 0.00171  | 0.11692  |  |  |  |
| 0610011L14R1K | RIKEN cDNA 0610011L14 gene | BG074913  | 2      | 5.186  | 6.457                                               | 5.305  | 6.331  | 5.946  | 5.472  | 4.078  | 5.564  | 5.924  | 6.331  | 6.304  | 6.367  | 5.594  | 5.664  | 5.536  | 5.187  | 5.496  | 6.442  | 5.6                   | 5.754     | 0.88339 | 0.53854   | 0.31526 | 0.25373 | 0.57507 | 0.01355 | 0.19562 | 0.63276        | 0.01097  | -0.29785 |  |  |  |
| 0610012D14R1K | RIKEN cDNA 0610012D14 gene | A1852425  | 7      | 7.229  | 4.79                                                | 6.123  | 5.988  | 5.07   | 4.119  | 4.846  | 5.914  | 6.23   | 5.95   | 5.741  | 7.03   | 6.051  | 6.073  | 6.807  | 5.046  | 5.344  | 5.663  | 5.654                 | 0.58628   | 0.47333 | 0.57551   | 0.30545 | 0.48768 | 0.01393 | 0.41961 | 0.61074 | 0.20672        | -1.44387 |          |  |  |  |
| 0610025P10R1K | RIKEN cDNA 0610025P10 gene | BG076251  | 11     | 6.335  | 7.417                                               | 7.475  | 6.214  | 5.863  | 6.096  | 7.375  | 7.984  | 6.998  | 6.907  | 6.405  | 6.561  | 7.879  | 7.485  | 7.71   | 7.014  | 6.563  | 7.704  | 6.881                 | 5.771     | 0.26330 | 0.41507   | 0.71852 | 0.33384 | 0.27204 | 0.01718 | 0.75890 | 0.71887        | 0.11339  | 1.01149  |  |  |  |
| 061003E20R1K  | RIKEN cDNA 061003E20 gene  | BQ560776  | 6      | 8.431  | 8.524                                               | 7.665  | 8.24   | 8.497  | 7.832  | 8.808  | 7.496  | 8.443  | 8.099  | 7.961  | 8.487  | 8.516  | 8.247  | 8.187  | 8.716  | 7.906  | 7.743  | 6.889                 | 8.709     | 0.96656 | 0.55751   | 0.95964 | 0.38399 | 0.63963 | 0.01339 | 0.94505 | 0.75824        | 0.14465  | -1.16315 |  |  |  |
| 061003J106R1K | RIKEN cDNA 061003J106 gene | BG042831  | 3      | 9.874  | 9.292                                               | 9.364  | 9.42   | 9.392  | 9.653  | 9.281  | 8.773  | 8.633  | 9.974  | 9.267  | 9.711  | 8.897  | 9.414  | 9.334  | 8.884  | 9.094  | 9.579  | 9.238                 | 8.901     | 0.44379 | 0.44490   | 0.74136 | 0.33839 | 0.09032 | 0.05357 | 0.87031 | 0.74341        | 0.18233  | -1.33562 |  |  |  |
| 061003J715R1K | RIKEN cDNA 061003J715 gene | A4429187  | 4      | 5.115  | 6.653                                               | 5.459  | 4.644  | 6.187  | 5.229  | 5.276  | 6.688  | 5.328  | 5.296  | 5.338  | 5.688  | 5.428  | 5.229  | 5.573  | 5.672  | 5.71   | 5.342  | 6.946                 | 0.79059   | 0.51791 | 0.75305   | 0.34073 | 0.37864 | 0.01493 | 0.63982 | 0.68788 | 0.04575        | -0.61931 |          |  |  |  |
| 061003J713R1K | RIKEN cDNA 061003J713 gene | BQ560342  | 4      | 9.404  | 9.177                                               | 8.92   | 10.142 | 9.32   | 8.841  | 9.601  | 9.216  | 9.191  | 8.763  | 9.072  | 8.761  | 9.09   | 8.578  | 8.806  | 9.291  | 9.039  | 9.06   | 8.928                 | 8.229     | 0.29095 | 0.41863   | 0.39014 | 0.26902 | 0.31802 | 0.01596 | 0.15703 | 0.48582        | 0.24354  | -1.60486 |  |  |  |
| 0610038F07R1K | RIKEN cDNA 0610038F07 gene | BG072961  | 19     | 7.308  | 6.765                                               | 7.833  | 7.129  | 7.187  |        | 6.809  | 6.142  | 6.038  | 7.462  | 6.196  | 7.119  | 5.743  | 7.549  | 6.979  | 6.871  | 6.882  | 6.731  | 7.142                 | 0.19446   | 0.40887 | 0.40296   | 0.27160 | 0.11434 | 0.03824 | 0.49673 | 0.64071 | 0.25749        | 1.66560  |          |  |  |  |
| 0610040Q1R1K  | RIKEN cDNA 0610040Q1 gene  | BQ560011  | 5      | 5.59   | 5.769                                               | 5.184  | 7.907  | 2.632  | 4.322  | 9.44   | 5.694  | 5.67   | 4.358  | 5.378  | 4.72   | 6.492  | 3.907  | 5.634  | 5.45   | 5.62   | 5.263  | 4.907                 | 5.737     | 0.84590 | 0.53016   | 0.61142 | 0.31254 | 0.71336 | 0.01327 | 0.59458 | 0.67423        | 0.71942  | 4.52917  |  |  |  |
| 0710008K08R1K | RIKEN cDNA 0710008K08 gene | A1842994  | 8      | 7.52   | 8.223                                               | 7.605  | 7.993  | 7.782  | 9.149  | 8.371  | 8.459  | 7.564  | 8.884  | 7.582  | 8.2    | 6.716  | 6.762  | 7.674  | 7.934  | 7.327  | 7.512  | 8.923                 | 0.37126   | 0.43156 | 0.15525   | 0.21894 | 0.05830 | 0.10322 | 0.12651 | 0.46931 | 0.59198        | 0.34061  |          |  |  |  |
| 0910001A06R1K | RIKEN cDNA 0910001A06 gene | CK348117  | 15     | 9.844  | 9.165                                               | 9.53   | 9.085  | 9.362  | 9.462  | 9.525  | 9.266  | 9.715  | 9.482  | 9.651  | 7.719  | 9.075  | 8.228  | 8.801  | 8.589  | 10.124 | 9.555  | 9                     | 9.591     | 0.14074 | 0.40790   | 0.65580 | 0.32134 | 0.12581 | 0.03358 | 0.16128 | 0.48809        | 0.26406  | 1.69426  |  |  |  |
| 0910001L09R1K | RIKEN cDNA 0910001L09 gene | A1836224  | 5      | 9.914  | 9.537                                               | 9.983  | 10.023 | 9.658  | 9.361  | 9.111  | 9.62   | 9.368  | 11.91  | 9.621  | 10.207 | 9.623  | 9.607  | 9.99   | 9.935  | 9.999  | 9.629  | 9.624                 | 0.83209   | 0.42099 | 0.74190   | 0.33850 | 0.75951 | 0.01325 | 0.82963 | 0.73481 | 0.00403        | -0.17997 |          |  |  |  |
| 1110001A07R1K | RIKEN cDNA 1110001A07 gene | BG066261  | 11     | 7.531  | 8.17                                                | 7.823  | 7.572  | 6.804  | 8.768  | 7.171  | 8.346  | 8.076  | 8.853  | 8.103  | 7.583  | 8.301  | 8.245  | 7.515  | 7.592  | 8.164  | 7.397  | 6.849                 | 8.106     | 0.22376 | 0.41099   | 0.50660 | 0.29196 | 0.11704 | 0.07033 | 0.82913 | 0.73470        | 0.06611  | 0.75734  |  |  |  |
| 1110001D15R1K | RIKEN cDNA 1110001D15 gene | BG074543  | 9      | 5.746  | 5.443                                               | 7.155  | 6.34   | 8.7    | 5.706  | 4.407  | 5.632  | 5.57   | 4.872  | 5.833  | 6.12   | 7.387  | 5.763  | 6.368  | 6.48   | 6.754  | 5.89   | 5.94                  | 5.526     | 0.58915 | 0.47394   | 0.02814 | 0.18660 | 0.02990 | 0.24806 | 0.32068 | 0.56712        | 0.00183  | 0.09709  |  |  |  |
| 1110001J03R1K | RIKEN cDNA 1110001J03 gene | A1848967  | 6      | 9.9    | 9.751                                               | 10.082 | 9.994  | 9.619  | 10.16  | 9.514  | 9.939  |        |        |        |        |        |        |        |        |        |        |                       |           |         |           |         |         |         |         |         |                |          |          |  |  |  |

| Gene Symbol   | Name                        | Accession # | Ch | P30_C1 | P30_C2 | P30_C3 | P30_C4 | P30_C5 | P70_C1 | P70_C2 | P70_C3 | P30_E1 | P30_E2 | P30_E3 | P30_E4 | P30_E5 | P70_E1 | P70_E2 | P70_E3 | P70_E4 | P70_E5 | P30C v P70C p | Age FDR | CvE p   | CvE FDR | r <sup>2</sup> | t       |         |         |         |         |                |
|---------------|-----------------------------|-------------|----|--------|--------|--------|--------|--------|--------|--------|--------|--------|--------|--------|--------|--------|--------|--------|--------|--------|--------|---------------|---------|---------|---------|----------------|---------|---------|---------|---------|---------|----------------|
| 1110059M19R1K | RIKEN cDNA 1110059M19 gene  | AI848341    | X  | 7.849  | 7.525  | 7.243  | 6.609  | 6.419  | 9.507  | 8.356  | 6.653  | 7.157  | 7.487  | 7.383  | 8.121  | 7.7    | 7.103  | 7.326  | 7.575  | 7.81   | 7.229  | 7.322         | 0.21553 | 0.41031 | 0.44361 | 0.27965        | 0.25687 | 0.01771 | 0.93786 | 0.75686 | 0.09065 | -0.89304       |
| 1110067D22R1K | RIKEN cDNA 1110067D22 gene  | BG070746    | 11 | 7.688  | 7.123  | 7.723  | 6.304  | 7.427  | 7.666  | 6.573  | 7.201  | 6.87   | 7.25   | 7.681  | 8.026  | 7.523  | 6.598  | 7.468  | 8.013  | 7.96   | 7.888  | 6.603         | 0.98172 | 0.56107 | 0.08412 | 0.20212        | 0.08523 | 0.05833 | 0.16247 | 0.48873 | 0.00908 | -0.08852       |
| 1190002A17R1K | RIKEN cDNA 1190002A17 gene  | BG071089    | 2  | 8.093  | 7.437  | 7.737  | 6.818  | 4.957  | 5.17   | 6.527  | 7.276  | 7.563  | 7.802  | 5.082  | 5.777  | 5.871  | 6.905  | 7.425  | 7.399  | 6.223  | 5.869  | 4.503         | 0.18137 | 0.40823 | 0.26024 | 0.24222        | 0.30329 | 0.01630 | 0.80758 | 0.72998 | 0.38549 | -2.24018       |
| 1190002H23R1K | RIKEN cDNA 1190002H23 gene  | AI853458    | 14 | 7.889  | 8.191  | 8.103  | 7.544  | 7.047  | 8.138  | 7.208  | 7.921  | 8.578  | 7.706  | 7.899  | 8.096  | 8.552  | 7.047  | 7.329  | 7.954  | 7.531  | 6.914  | 8.382         | 0.93251 | 0.54965 | 0.41989 | 0.27497        | 0.62841 | 0.01341 | 0.57968 | 0.66950 | 0.03137 | 0.50898        |
| 1190002N15R1K | RIKEN cDNA 1190002N15 gene  | AI850749    | 9  | 4.644  | 4.907  | 4.263  | 6.416  | 4.084  | 9.765  | 3.805  | 4.7    | 3.953  | 4.585  | 4.258  | 3.814  | 3.322  | 4.044  | 3.835  | 3.322  | 4.044  | 4.68   | 2.907         | 0.05212 | 0.42092 | 0.11404 | 0.20940        | 0.48981 | 0.01392 | 0.91778 | 0.39763 | 0.10766 | -0.98245       |
| 1190005F20R1K | RIKEN cDNA 1190005F20 gene  | BQ553816    | 1  | 5.806  | 6.992  | 9.136  | 6.364  | 6.084  |        | 8.814  | 5.273  | 6.714  | 6.084  | 6.779  | 5.947  | 4.907  | 5.561  | 5.702  | 6.060  | 6.994  | 6.258  | 7.371         | 0.40551 | 0.40791 | 0.80751 | 0.35179        | 0.87498 | 0.01333 | 0.20634 | 0.51184 | 0.00914 | 0.27160        |
| 1190005I06R1K | RIKEN cDNA 1190005I06 gene  | AI844196    | 8  | 5.592  | 7.487  | 5.313  | 3.538  | 4.314  | 6.297  | 7.25   | 6.272  | 5.465  | 6.115  | 5.153  | 5.766  | 5.129  | 6.682  | 6.022  | 4.163  | 6.034  | 8.483  | 5.057         | 0.03381 | 0.42863 | 0.06359 | 0.19684        | 0.01109 | 0.47018 | 0.92032 | 0.75346 | 0.00101 | -0.08980       |
| 1190005P17R1K | RIKEN cDNA 1190005P17 gene  | AI661134    | 10 | 9.69   | 9.084  | 8.804  | 9.527  | 9.201  | 8.83   | 8.577  | 9.383  | 8.825  | 9.466  | 9.127  | 9.127  | 9.026  | 8.56   | 9.388  | 9.194  | 9.231  | 9.843  | 9.001         | 0.41783 | 0.44003 | 0.25774 | 0.24169        | 0.32662 | 0.01578 | 0.76302 | 0.71983 | 0.03459 | -0.53536       |
| 1190007F07R1K | RIKEN cDNA 1190007F07 gene  | BG076322    | 4  | 8.694  | 8.566  | 8.14   | 8.987  | 8.105  | 8.003  | 8.762  | 8.394  | 7.778  | 8.204  | 7.922  | 8.426  | 8.056  | 7.884  | 8.327  | 7.519  | 8.422  | 9.208  | 8.336         | 0.09834 | 0.41099 | 0.75660 | 0.34144        | 0.70480 | 0.01626 | 0.49962 | 0.64178 | 0.45438 | <b>2.58114</b> |
| 1190007J07R1K | RIKEN cDNA 1190007J07 gene  | BQ550858    | 10 | 5.757  | 6.186  | 5.205  | 6.038  | 6.208  | 7.781  | 4.409  | 6.361  | 6.292  | 5.512  | 6.474  | 6.136  | 6.311  | 6.16   | 6.338  | 6.099  | 5.893  | 5.858  | 5.735         | 0.51419 | 0.45862 | 0.89514 | 0.37002        | 0.53470 | 0.01370 | 0.89004 | 0.73030 | 0.00100 | -0.08937       |
| 1200003C05R1K | RIKEN cDNA 1200003C05 gene  | AI835831    | 12 | 9.704  | 9.423  | 9.78   | 9.495  | 9.439  | 9.552  | 9.656  | 9.676  | 9.662  | 9.167  | 9.643  | 9.46   | 9.674  | 10.327 | 9.56   | 9.086  | 9.726  | 9.372  | 10.078        | 0.36022 | 0.42962 | 0.50376 | 0.29140        | 0.20217 | 0.02054 | 0.91300 | 0.75554 | 0.00462 | -0.19271       |
| 1200009I06R1K | RIKEN cDNA 1200009I06 gene  | AI428179    | 12 | 6.687  | 6.527  | 7.083  | 6.074  | 6.995  | 4.147  | 8.434  | 6.885  | 8.395  | 9.061  | 7.507  | 7.366  | 6.641  | 6.084  | 7.274  | 7.281  | 6.763  | 6.424  | 7.157         | 0.44987 | 0.44605 | 0.57699 | 0.30574        | 0.45374 | 0.01416 | 0.78621 | 0.72518 | 0.21296 | -1.47128       |
| 1200009Q22R1K | RIKEN cDNA 1200009Q22 gene  | AI851976    | 6  | 8.7    | 7.16   | 9.24   | 8.398  | 8.307  | 8.712  | 9.08   | 8.006  | 8.597  | 8.922  | 9.243  | 8.258  | 8.635  | 8.645  | 8.588  | 8.203  | 8.499  | 8.248  | 6.889         | 0.75705 | 0.51047 | 0.02751 | 0.18639        | 0.33611 | 0.01560 | 0.91177 | 0.46123 | 0.06963 | 0.77375        |
| 12000111B1R1K | RIKEN cDNA 12000111B gene   | AI853909    | 14 | 8.473  | 8.531  | 8.357  | 8.892  | 8.044  | 6.967  | 8.239  | 7.981  | 7.862  | 7.076  | 7.755  | 8.015  | 7.81   | 8.034  | 8.73   | 7.683  | 8.36   | 8.833  | 8.112         | 0.11600 | 0.40920 | 0.38524 | 0.26804        | 0.02027 | 0.35298 | 0.96920 | 0.76277 | 0.07378 | -0.79826       |
| 1200013P24R1K | RIKEN cDNA 1200013P24 gene  | AI448764    | 16 | 10.264 | 10.37  | 10.752 | 10.714 | 10.458 |        | 10.636 | 10.334 | 10.192 | 10.363 | 10.688 | 10.17  | 10.605 | 10.172 | 10.146 | 10.371 | 10.315 | 10.426 | 11.074        | 0.33931 | 0.42607 | 0.36957 | 0.26487        | 0.36862 | 0.01507 | 0.95947 | 0.76756 | 0.08717 | -0.87404       |
| 1200014J11R1K | RIKEN cDNA 1200014J11 gene  | AI850967    | 11 | 7.241  | 6.773  | 6.948  | 6.427  | 6.644  | 6.718  | 6.144  | 6.646  | 5.443  | 7.474  | 8.125  | 6.545  | 7.819  | 6.864  | 6.561  | 7.807  | 7.409  | 7.183  | 5.937         | 0.66345 | 0.48983 | 0.25152 | 0.24036        | 0.22286 | 0.01922 | 0.82756 | 0.52260 | 0.00344 | -0.16621       |
| 1200014M14R1K | RIKEN cDNA 1200014M14 gene  | BG070152    | 13 | 5.763  | 5.035  | 5.629  | 5.81   | 6.459  | 2.652  | 6.459  | 3.709  | 5.759  | 6.459  | 4.205  | 4.912  | 5      | 6.429  | 4.9    | 5.667  | 5.831  | 5.177  | 8.044         | 0.00564 | 0.45308 | 0.21635 | 0.23267        | 0.39146 | 0.01477 | 0.22702 | 0.73533 | 0.01832 | -1.36151       |
| 1200015F23R1K | RIKEN cDNA 1200015F23 gene  | AI841400    | 2  | 4.126  | 1.585  | 5.143  | 4.422  | 3.664  | 8.05   | 12.847 | 9.187  | 0.204  | 4.406  | 5.09   | 3.627  | 3.491  | 3.143  | 4.764  |        | 4.946  | 4.406  | 0             | 0.71042 | 0.50014 | 0.27776 | 0.24590        | 0.19190 | 0.02138 | 0.30509 | 0.55988 | 0.48926 | -2.76833       |
| 1200015N20R1K | RIKEN cDNA 1200015N20 gene  | BQ560403    | 10 | 7.577  | 7.217  | 7.396  | 7.668  | 7.7    | 8.308  | 8.974  | 7.276  | 7.467  | 7.341  | 7.346  | 7.145  | 7.866  | 7.223  | 7.453  | 7.995  | 7.767  | 7.227  | 7.311         | 0.45709 | 0.44744 | 0.30436 | 0.25146        | 0.33516 | 0.01562 | 0.38369 | 0.52801 | 0.00204 | -0.12785       |
| 1200016B10R1K | RIKEN cDNA 1200016B10 gene  | AI850837    | 1  | 7.867  | 6.798  | 8.036  | 7.425  | 7.261  | 9.408  | 7.7    | 7.033  | 7.326  | 8.084  | 7.321  | 7.531  | 7.73   | 6.875  | 7.44   | 7.834  | 7.255  | 7.218  | 7.458         | 0.75958 | 0.47193 | 0.27029 | 0.24434        | 0.41436 | 0.01451 | 0.19602 | 0.50645 | 0.08471 | 0.86048        |
| 1300001I01R1K | RIKEN cDNA 1300001I01 gene  | AI894090    | 11 | 10.038 | 10.169 | 9.721  | 7.925  | 7.738  | 10.112 | 10.077 | 9.896  | 9.823  | 10.014 | 9.662  | 9.493  | 9.976  | 9.801  | 10.163 | 9.823  | 9.838  | 9.919  | 9.757         | 0.62387 | 0.48323 | 0.33430 | 0.25767        | 0.24210 | 0.01829 | 0.32327 | 0.56790 | 0.00066 | -0.07294       |
| 1300002E11R1K | RIKEN cDNA 1300002E11 gene  | AI851692    | 16 | 5.448  | 4.755  | 5      | 7.332  | 4.845  | 7.693  | 9.278  | 6.017  | 6.524  | 8.224  | 0      | 5.803  | 5.002  | 3.42   | 6.582  | 4.142  | 5.196  | 5.38   | 6.109         | 0.42361 | 0.44111 | 0.00879 | 0.17954        | 0.00662 | 0.53699 | 0.02689 | 0.40582 | 0.06411 | 0.74030        |
| 1300003B13R1K | RIKEN cDNA 1300003B13 gene  | BQ553718    | 17 | 7.672  | 6.511  | 6.92   | 7.576  | 6.667  | 6.553  | 6.706  | 7.488  | 6.833  | 6.445  | 7.224  | 6.329  | 7.122  | 5.729  | 7.235  | 8.121  | 7.323  | 7.704  | 6.259         | 0.62545 | 0.48165 | 0.28662 | 0.24755        | 0.70465 | 0.01328 | 0.38458 | 0.69766 | 0.00005 | -0.07209       |
| 1300010F03R1K | RIKEN cDNA 1300010F03 gene  | BG072350    | 14 | 5.412  | 6.148  | 5.84   | 6.727  | 4.956  | 6.872  | 8.19   | 6.026  | 6.42   | 9.719  | 6.252  | 7.477  | 4.783  | 5.937  | 4.959  | 5.500  | 4.807  | 7.193  | 6.2           | 0.30418 | 0.42053 | 0.39944 | 0.27089        | 0.17145 | 0.02358 | 0.21143 | 0.51445 | 0.00861 | -0.26355       |
| 1300010M03R1K | RIKEN cDNA 1300010M03 gene  | BQ075182    | 11 | 9.544  | 8.616  | 9.453  | 9.779  | 9.175  | 9.381  | 9.26   | 9.044  | 9.686  | 9.608  | 9.645  | 9.072  | 9.637  | 9.106  | 9.738  | 10.068 | 9.522  | 9.493  | 9.036         | 0.77973 | 0.51555 | 0.63180 | 0.31386        | 0.68602 | 0.01330 | 0.62933 | 0.66517 | 0.02803 | -0.48036       |
| 1300012G16R1K | RIKEN cDNA 1300012G16 gene  | BG074142    | 5  | 7.43   | 6.941  | 6.798  | 7.248  | 7.04   | 5.384  | 7.131  | 7.073  | 7.302  | 7.07   | 6.519  | 6.337  | 7.011  | 5.792  | 6.414  | 7.002  | 6.712  | 6.783  | 7.175         | 0.01680 | 0.43918 | 0.47708 | 0.28620        | 0.44390 | 0.01424 | 0.46312 | 0.62795 | 0.07567 | 0.80928        |
| 1300014I06R1K | RIKEN cDNA 1300014I06 gene  | AI428360    | 13 | 6.21   | 6.253  | 11.954 | 5.937  | 7.845  | 4.009  | 4.798  | 7.153  | 6.047  | 7.331  | 5.474  | 6.137  | 6.685  | 8.068  | 5.855  | 6.72   | 5.867  | 6.899  | 6.688         | 0.53434 | 0.42860 | 0.45101 | 0.28110        | 0.21301 | 0.01980 | 0.64587 | 0.68963 | 0.06224 | -0.72850       |
| 1300017J02R1K | RIKEN cDNA 1300017J02 gene  | AI446939    | 9  | 11.239 | 11.234 | 11.13  | 10.943 | 11.074 | 11.366 | 11.099 | 10.827 | 10.45  | 10.663 | 11.32  | 11.254 | 11.396 | 11.088 | 11.139 | 10.662 | 10.866 | 11.085 | 10.78         | 0.18227 | 0.40827 | 0.94623 | 0.18033        | 0.19129 | 0.02143 | 0.59037 | 0.67291 | 0.00346 | -0.16659       |
| 1300018I05R1K | RIKEN cDNA 1300018I05 gene  | BQ559081    | 17 | 5.087  | 5.951  | 5.743  | 7.4    | 5.392  | 4.672  | 4.935  | 4.966  | 5.257  | 4.644  | 6.192  | 4.513  | 8.087  | 5.35   | 5.069  | 5.569  | 5.858  | 4.342  | 6.486         | 0.50616 | 0.45703 | 0.06680 | 0.19768        | 0.08199 | 0.06179 | 0.08423 | 0.44502 | 0.02511 | 0.45389        |
| 1300018J18R1K | RIKEN cDNA 1300018J18 gene  | BQ553000    | 15 | 7.167  | 6.685  | 6.868  | 8.121  | 6.265  | 7.016  | 7.624  | 7.422  | 4.539  | 7.214  | 6.206  | 6.61   | 4.904  | 4.954  | 6.11   | 6.809  | 7.652  | 6.657  | 6.706         | 0.05542 | 0.41984 | 0.69839 | 0.32982        | 0.09894 | 0.01329 | 0.39683 | 0.58482 | 0.02367 | 0.44400        |
| 1500001M12R1K | RIKEN cDNA 1500001M120 gene | BG065846    | 6  | 5.753  | 6.337  | 6.954  | 6.096  | 6.189  | 5.369  | 4.149  | 5.644  | 5.574  | 3.732  | 7.057  | 4.508  | 7.025  | 5.726  | 6.967  | 5.615  | 6.634  | 5.794  | 6.327         | 0.75653 | 0.51036 | 0.01935 | 0.18362        | 0.01478 | 0.42125 | 0.17539 | 0.49378 | 0.14164 | -1.14898       |
| 1500002Q20R1K | RIKEN cDNA 1500002Q20 gene  | AI852947    | 7  | 8.71   | 9.307  | 8.292  | 9.409  | 8.785  | 7.99   | 9.058  | 8.378  | 7.784  | 7.861  | 8.323  | 7.908  | 9.306  | 8.692  | 8.441  | 8.33   | 8.12   | 3.57   | 8.451         | 0.26951 | 0.41581 | 0.01749 | 0.18296        | 0.00418 | 0.54062 | 0.95330 | 0.76018 | 0.48678 | <b>2.75462</b> |
| 1500003Q03R1K | RIKEN cDNA 1500003Q03 gene  | AI845888    | 2  | 10.372 | 9.817  | 10.164 | 10.406 | 9.98   | 10.341 | 9.874  | 9.913  | 9.85   | 10.285 | 9.803  | 9.776  | 10.082 | 9.825  | 9.864  | 9.934  | 10.143 |        |               |         |         |         |                |         |         |         |         |         |                |

| Gene Symbol   | Name                              | Accession # | Ch | P30_C1 | P30_C2 | P30_C3 | P30_C4 | P30_C5 | P70_C1 | P70_C2 | P70_C3 | P70_C4 | P30_E1 | P30_E2 | P30_E3 | P30_E4 | P30_E5 | P70_E1 | P70_E2 | P70_E3 | P70_E4 | P70_E5 | P30 Cve p | P30 FDR | P70 Cve p | P70 FDR | P30C v P70C p | Age FDR | Cve p   | Cve FDR | r <sup>2</sup> | t        |                |
|---------------|-----------------------------------|-------------|----|--------|--------|--------|--------|--------|--------|--------|--------|--------|--------|--------|--------|--------|--------|--------|--------|--------|--------|--------|-----------|---------|-----------|---------|---------------|---------|---------|---------|----------------|----------|----------------|
| 1700023F02RIK | RIKEN cDNA 1700023F02 gene        | A1427917    | 7  | 6.334  | 5.655  | 6.229  | 6.873  | 6.354  | 6.518  | 5.987  | 7.719  | 7.247  | 8.148  | 6.989  | 6.32   | 6.002  | 7.167  | 6.495  | 7.852  | 6.153  | 6.747  | 5.982  | 7.366     | 0.32148 | 0.42319   | 0.58144 | 0.30661       | 0.09289 | 0.05140 | 0.99778 | 0.76797        | 0.17564  | -1.30558       |
| 1700026D08RIK | RIKEN cDNA 1700026D08 gene        | BG073872    | 7  | 6.115  | 7.569  | 6.811  | 7.165  | 8.191  | 7.033  | 7.2    | 7.569  | 6.695  | 6.944  | 7.341  | 6.874  | 6.369  | 7.526  | 6.666  | 7.098  | 6.277  | 7.378  | 6.351  | 6.948     | 0.61371 | 0.47914   | 0.31472 | 0.25362       | 0.83392 | 0.01327 | 0.29828 | 0.55669        | 0.52040  | <b>2.94630</b> |
| 1700027J05RIK | RIKEN cDNA 1700027J05 gene        | A1837747    | 15 | 7.224  | 7.782  | 6.946  | 7.169  | 5.236  | 7.885  | 7.701  | 8.437  | 5.329  | 6.481  | 7.337  | 7.878  | 8.003  | 6.62   | 6.649  | 8.388  | 8.272  | 7.646  | 7.631  | 5.844     | 0.42621 | 0.44159   | 0.62499 | 0.31522       | 0.67676 | 0.01332 | 0.35656 | 0.58342        | 0.09567  | -0.91998       |
| 1700027N10RIK | RIKEN cDNA 1700027N10 gene        | BG072440    | 17 | 6.71   | 8.146  | 7.094  | 6.652  | 7.107  | 5.478  | 5.148  | 6.322  | 6.501  | 7.139  | 7.057  | 6.851  | 6.148  | 7.131  | 7.144  | 7.044  | 5.928  | 7.117  | 6.447  | 7.773     | 0.41248 | 0.43904   | 0.15747 | 0.21944       | 0.05170 | 0.12268 | 0.48101 | 0.63481        | 0.52224  | -2.95716       |
| 1700029F09RIK | RIKEN cDNA 1700029F09 gene        | BG069955    | 1  | 6.921  | 5.881  | 5.345  | 6.261  | 7.363  | 2.963  | 7.746  | 5.426  | 5.21   | 5.718  | 7.363  | 5.285  | 6.544  | 6.511  | 4.986  | 4.516  | 6.328  | 5.65   | 6.728  | 5.531     | 0.71562 | 0.50129   | 0.63922 | 0.31804       | 0.28883 | 0.01668 | 0.82750 | 0.73435        | 0.14050  | -1.14355       |
| 1700029G01RIK | RIKEN cDNA 1700029G01 gene        | BG069565    | 4  | 7.392  | 4.626  | 2.57   | 4.893  | 5.411  | 3.933  | 3.943  | 4.67   | 5.426  | 8.007  | 5.018  | 4.606  | 5.181  | 4.907  | 4.372  | 7.023  | 5.364  | 4.642  | 5.57   | 4.497     | 0.15233 | 0.40770   | 0.14291 | 0.21612       | 0.09605 | 0.04895 | 0.98246 | 0.76521        | 0.02865  | -0.48572       |
| 170029I01RIK  | RIKEN cDNA 170029I01 gene         | BG068756    | 4  | 5.837  | 5.387  | 4.256  | 4.878  | 4.556  | 2.059  | 9.966  | 5.544  | 5.306  | 6.322  | 6.106  | 4.346  | 4.686  | 3.959  | 4.707  | 5.745  | 6.627  | 4.882  | 5.555  | 5.938     | 0.64290 | 0.48539   | 0.94628 | 0.38104       | 0.52689 | 0.01373 | 0.24701 | 0.73316        | 0.13313  | 1.10840        |
| 1700030K09RIK | RIKEN cDNA 170030K09 gene         | A1426479    | 8  | 7.621  | 7.17   | 6.967  | 6.793  | 7.096  | 7.44   | 7.642  | 7.611  | 6.976  | 6.853  | 6.879  | 7.101  | 7.226  | 5.417  | 6.914  | 7.602  | 7.227  | 7.738  | 7.312  | 7.209     | 0.27500 | 0.41650   | 0.57880 | 0.30510       | 0.43862 | 0.01428 | 0.74564 | 0.63311        | 0.23603  | 1.57216        |
| 1700034H14RIK | RIKEN cDNA 1700034H14 gene        | BG075572    | 18 | 4.6    | 4.637  | 5.559  | 6.209  | 4.779  | 2.862  | 5.57   | 5.886  | 5.951  | 7.794  | 5.504  | 6.262  | 6.263  | 6.014  | 5.42   | 6.024  | 5.293  | 6.138  | 5.864  | 5.769     | 0.00697 | 0.45085   | 0.80526 | 0.35133       | 0.44262 | 0.01425 | 0.14854 | 0.50046        | 0.00147  | 1.08577        |
| 1700036D21RIK | RIKEN cDNA 1700036D21 gene        | BG071572    | 9  | 6.488  | 6.842  | 6.503  | 5.776  | 2.614  | 3.837  | 3.705  | 5.187  | 3.969  | 5.869  | 5.637  | 6.069  | 6.552  | 5.582  | 5.703  | 5.881  | 6.691  | 6.482  | 5.755  | 7.04      | 0.75923 | 0.47186   | 0.00556 | 0.17801       | 0.23663 | 0.01845 | 0.92778 | 0.40655        | 0.02389  | 0.44246        |
| 1700037C18RIK | RIKEN cDNA 1700037C18 gene        | A1427534    | 16 | 7.767  | 5.556  | 6.986  | 7.748  | 8.185  | 7.31   | 7.09   | 8.547  | 7.538  | 8.668  | 8.518  | 7.708  | 8.088  | 5.531  | 7.381  | 6.846  | 7.828  | 7.74   | 8.063  | 0.23117   | 0.41165 | 0.24590   | 0.28147 | 0.23689       | 0.01341 | 0.92603 | 0.75457 | 0.13015        | -1.09406 |                |
| 1700040I03RIK | RIKEN cDNA 170040I03 gene         | BG076350    | 6  | 10.662 | 7.236  | 7.477  | 7.492  | 7.39   | 8.157  | 7.782  | 7.788  | 7.348  | 7.494  | 5.684  | 8.074  | 6.92   | 7.262  | 7.765  | 8.273  | 8.718  | 7.815  | 7.439  | 7.392     | 0.27378 | 0.41634   | 0.52808 | 0.29615       | 0.62700 | 0.01341 | 0.40122 | 0.60286        | 0.39256  | -2.73739       |
| 1700041B20RIK | RIKEN cDNA 1700041B20 gene        | AA003680    | 2  | 4.336  | 5.655  | 5.141  | 4.498  | 5.777  | 8.172  | 6.744  | 9.873  | 4.662  | 2.684  | 5.52   | 2.484  | 2.949  | 5.158  | 4.113  | 3.731  | 3.517  | 4.599  | 5.157  | 0.65890   | 0.48884 | 0.28397   | 0.24720 | 0.26019       | 0.01759 | 0.20905 | 0.51324 | 0.02621        | -0.73099 |                |
| 1700041C02RIK | RIKEN cDNA 1700041C02 gene        | BG074444    | 4  | 6.893  | 6.28   | 5.991  | 7.115  | 5.747  | 8.468  | 10.674 | 12.154 | 7.837  | 5.595  | 5.902  | 5.547  | 6.837  | 6.539  | 7.347  | 7.401  | 7.155  | 7.048  | 5.173  | 7.582     | 0.94559 | 0.55265   | 0.12747 | 0.21255       | 0.06150 | 0.09539 | 0.18621 | 0.50133        | 0.08428  | -0.85807       |
| 1700045I19RIK | RIKEN cDNA 1700045I19 gene        | A1853461    | X  | 15.113 | 15.195 | 15.252 | 15.019 | 15.214 | 14.802 | 14.573 | 14.772 | 15.076 | 14.567 | 14.567 | 14.709 | 15.046 | 14.948 | 14.657 | 15.075 | 14.533 | 15.352 | 14.904 | 14.792    | 0.00570 | 0.45299   | 0.32698 | 0.25616       | 0.00441 | 0.53880 | 0.39860 | 0.60175        | 0.02948  | 0.49292        |
| 1700047I17RIK | RIKEN cDNA 1700047I17 gene 2      | BQ545455    | 12 | 7.274  | 8.879  | 7.539  | 7.258  | 8.267  | 9.276  | 8.684  | 8.223  | 7.161  | 6.225  | 8.319  | 6.873  | 6.112  | 7.065  | 6.847  | 7.642  | 7.368  | 8.613  | 8.248  | 6.616     | 0.13282 | 0.40819   | 0.74682 | 0.33948       | 0.91398 | 0.01341 | 0.21445 | 0.51599        | 0.04514  | 0.61499        |
| 1700052K11RIK | RIKEN cDNA 1700052K11 gene        | A1429125    | 11 | 5.995  | 6.063  | 6.38   | 6.45   | 6.57   | 5.763  | 7.972  | 6.674  | 6.648  | 7.633  | 6.266  | 5.489  | 6.441  | 6.486  | 5.648  | 5.876  | 5.672  | 5.265  | 6.2952 | 0.48252   | 0.02632 | 0.18599   | 0.16819 | 0.02402       | 0.02453 | 0.40385 | 0.04964 | 0.04964        | 0.04964  |                |
| 1700052N19RIK | RIKEN cDNA 1700052N19 gene        | BG065101    | 10 | 5.998  | 5.889  | 9.138  | 4.7    | 5.739  | 7.607  | 6.526  | 5.302  | 5.457  | 5.932  | 6.129  | 6.691  | 4.401  | 4.135  | 4.986  | 5.599  | 6.115  | 5.081  | 5.87   | 6.332     | 0.40034 | 0.43680   | 0.46105 | 0.28307       | 0.88501 | 0.03329 | 0.24041 | 0.52897        | 0.60189  | -3.47782       |
| 1700054F22RIK | RIKEN cDNA 1700054F22 gene        | A1429120    | 4  | 5.662  | 5.334  | 5.363  | 5.098  | 5.738  | 6.117  | 5.581  | 5.593  | 6      | 5.457  | 5.684  | 7.035  | 4.654  | 6.734  | 6.594  | 5.056  | 6.199  | 6.761  | 5.817  | 7.964     | 0.31572 | 0.42229   | 0.02110 | 0.18423       | 0.69430 | 0.01329 | 0.19422 | 0.39905        | 0.02883  | -0.48734       |
| 1700054N08RIK | RIKEN cDNA 1700054N08 gene        | A1853424    | 8  | 5.821  | 6.99   | 7.131  | 6.15   | 5.944  | 9.777  | 6.352  | 6.627  | 6.7    | 6.925  | 6.788  | 5.925  | 6.244  | 6.265  | 7.276  | 6.658  | 6.617  | 6.032  | 6.388  | 0.94801   | 0.55321 | 0.34299   | 0.25946 | 0.25625       | 0.01773 | 0.44268 | 0.61899 | 0.16201        | 1.24365  |                |
| 1700060H10RIK | RIKEN cDNA 1700060H10 gene        | A1852703    | 10 | 6.862  | 8.574  | 8.834  | 8.407  | 8.51   | 9.103  | 8.974  | 8.266  | 8.057  | 8.581  | 8.497  | 8.697  | 8.926  | 8.98   | 7.928  | 8.258  | 8.583  | 8.236  | 8.54   | 8.199     | 0.59216 | 0.47457   | 0.31222 | 0.25310       | 0.98112 | 0.01363 | 0.23312 | 0.52536        | 0.00234  | -1.3705        |
| 1700065O13RIK | RIKEN cDNA 1700065O13 gene        | A1839635    | 7  | 8.426  | 8.813  | 8.105  | 8.612  | 8.322  | 7.805  | 7.866  | 8.371  | 8.806  | 8.985  | 8.703  | 8.856  | 7.953  | 7.949  | 8.622  | 8.368  | 8.105  | 8.728  | 8.644  | 7.592     | 0.46306 | 0.44859   | 0.80376 | 0.35102       | 0.67222 | 0.02341 | 0.48797 | 0.63743        | 0.01958  | -3.9972        |
| 1700080E11RIK | RIKEN cDNA 1700080E11 gene        | A1429110    | 9  | 5.089  | 6.504  | 8.022  | 4.982  | 6.027  | 3.437  | 3.632  | 4.87   | 3.993  | 4.437  | 4.742  | 3.597  | 5.66   | 5.285  | 5.06   | 4.746  | 4.41   | 4.298  | 6.943  | 0.19379   | 0.40883 | 0.14298   | 0.21614 | 0.01192       | 0.45877 | 0.82497 | 0.73380 | 0.35814        | -2.11278 |                |
| 1700081D17RIK | RIKEN cDNA 1700081D17 gene        | A1429082    | 14 | 4.974  | 5.143  | 5.207  | 5.925  | 4.715  | 10.264 | 9.296  | 5.625  | 6.752  | 5.817  | 6.599  | 5.218  | 5      | 5.852  | 5.643  | 5.417  | 5.167  | 5.709  | 5.723  | 6.527     | 0.18141 | 0.40823   | 0.08246 | 0.20170       | 0.03644 | 0.19775 | 0.30655 | 0.56057        | 0.11136  | 1.00126        |
| 1700081L11RIK | RIKEN cDNA 1700081L11 gene        | BG076319    | 11 | 5.555  | 7.533  | 5.073  | 4.441  | 5.482  | 6.744  | 6.529  | 6.794  | 8.907  | 8.144  | 7.46   | 6.192  | 6.991  | 6.603  | 6.558  | 10.217 | 1.159  | 5.33   | 6.644  | 6.641     | 0.07574 | 0.41465   | 0.78762 | 0.34772       | 0.04758 | 0.13849 | 0.23973 | 0.52367        | 0.00463  | -0.18291       |
| 1700085B13RIK | RIKEN cDNA 1700085B13 gene        | A1429132    | 7  | 7.234  | 8.899  | 8.694  | 8.759  | 8.86   | 8.649  | 9.079  | 9.315  | 9.859  | 8.668  | 8.978  | 8.95   | 9.377  | 9.329  | 8.697  | 9.356  | 8.184  | 8.913  | 8.796  | 9.083     | 0.06979 | 0.41595   | 0.42907 | 0.27679       | 0.18890 | 0.02156 | 0.92177 | 0.75374        | 0.09108  | 0.89538        |
| 1700086L19RIK | RIKEN cDNA 1700086L19 gene        | BG070443    | 12 | 9.664  | 7.502  | 7.163  | 8.019  | 7.628  | 9.403  | 8.365  | 8.072  | 8.816  | 7.038  | 7.451  | 6.397  | 7.577  | 7.245  | 7.321  | 7.812  | 8.51   | 8.162  | 7.952  | 7.578     | 0.38192 | 0.43346   | 0.45281 | 0.28146       | 0.07723 | 0.06765 | 0.35397 | 0.58226        | 0.16547  | -1.25946       |
| 1700090G07RIK | RIKEN cDNA 1700090G07 gene        | A1449682    | 7  | 7.054  | 8.43   | 8.215  | 7.686  | 7.605  | 9.415  | 7.879  | 8.133  | 7.748  | 8.199  | 8.707  | 8.005  | 8.107  | 8.003  | 8.374  | 8.537  | 8.553  | 7.703  | 7.66   | 0.88093   | 0.53799 | 0.08085   | 0.32637 | 0.36187       | 0.01517 | 0.72333 | 0.71732 | 0.19164        | 1.93652  |                |
| 1700106N22RIK | RIKEN cDNA 1700106N22 gene        | A1849013    | 7  | 7.339  | 6.908  | 7.486  | 8.258  | 5.72   | 6.026  | 7.169  | 7.185  | 6.965  | 7.098  | 7.552  | 7.422  | 7.502  | 7.302  | 7.183  | 7.297  | 6.954  | 7.544  | 6.142  | 6.897     | 0.57036 | 0.47002   | 0.62705 | 0.31563       | 0.92041 | 0.01338 | 0.79260 | 0.72663        | 0.20823  | 1.45048        |
| 1700109H08RIK | RIKEN cDNA 1700109H08 gene        | BQ559416    | 5  | 6.475  | 6.983  | 5.788  | 5.788  | 5.106  | 8.628  | 12.999 | 9.535  | 5.426  | 8.734  | 6.29   | 5.859  | 5.23   | 5.527  | 5.931  | 3.665  | 5      | 5.459  | 5.38   | 0.20767   | 0.40972 | 0.12836   | 0.21276 | 0.23245       | 0.01877 | 0.95962 | 0.42961 | 0.00307        | -0.15699 |                |
| 1700110M12RIK | Hypothetical protein LOC100043421 | A1429140    | 14 | 6.256  | 5.388  | 4.807  | 4.852  | 6.087  | 7.392  | 6.494  | 4.948  | 5.518  | 7.923  | 5.485  | 5.062  | 4.755  | 5.585  | 5.749  | 7.682  | 5.653  | 5.958  | 4.745  | 5.9       | 0.37411 | 0.43206   | 0.54103 | 0.29867       | 0.16121 | 0.02506 | 0.36892 | 0.58891        | 0.01523  | 0.35177        |
| 1700123Q20RIK | RIKEN cDNA 1700123Q20 gene        | A1854099    | 14 | 9.222  | 9.317  | 9.659  | 9.903  | 9.427  | 9.889  | 9.24   | 9.638  | 9.386  | 10.002 | 9.355  | 9.422  | 9.684  | 9.996  | 9.929  | 9.761  | 9.308  | 9.798  | 9.533  | 0.58428   | 0.47291 | 0.63378   | 0.31696 | 0.37259       | 0.01501 | 0.92615 | 0.75460 | 0.03           |          |                |

| Gene Symbol     | Name                             | Accession # | Ch | P30_C1 | P30_C2 | P30_C3 | P30_C4 | P30_C5 | P70_C1 | P70_C2 | P70_C3 | P70_C4 | P70_C5 | P30_E1 | P30_E2 | P30_E3 | P30_E4 | P30_E5 | P70_E1 | P70_E2 | P70_E3 | P70_E4 | P70_E5  | P30 Cve p | P30 FDR | P70 FDR | P30C v P70C p | Age FDR | Cve p   | Cve FDR | r <sup>2</sup> | t        |                |         |
|-----------------|----------------------------------|-------------|----|--------|--------|--------|--------|--------|--------|--------|--------|--------|--------|--------|--------|--------|--------|--------|--------|--------|--------|--------|---------|-----------|---------|---------|---------------|---------|---------|---------|----------------|----------|----------------|---------|
| 2010316F05R1K   | RIKEN cDNA 2010316F05 gene       | A1662661    | 11 | 7.07   | 7.377  | 8.064  | 7.356  | 7.249  | 7.899  | 9.476  | 9.937  | 5.884  | 7.045  | 6.46   |        | 6.615  | 6.143  | 6.902  | 7.489  | 7.251  | 6.387  | 6.285  | 6.754   | 0.00697   | 0.45084 | 0.17806 | 0.22409       | 0.54215 | 0.01367 | 0.02122 | 0.40094        | 0.59473  | <b>1.42636</b> |         |
| 2010317E24R1K   | RIKEN cDNA 2010317E24 gene       | BG069706    | 2  | 6.122  | 6.253  | 6.796  | 6.585  | 6.63   | 5.018  | 7.153  | 4.91   | 6.34   | 7.89   | 6.304  | 4.67   | 7.308  | 8.202  | 6.61   | 7.274  | 5.884  | 5.727  | 5.867  | 6.537   | 0.18146   | 0.40823 | 0.99478 | 0.39196       | 0.77660 | 0.01324 | 0.48249 | 0.63537        | 0.00321  | -0.16059       |         |
| 2010321M09R1K   | RIKEN cDNA 2010321M09 gene       | BG065247    | 9  | 6.323  | 7.301  | 6.555  | 6.618  | 6.429  | 7.296  | 6.15   | 8.165  | 7.569  | 6.989  | 5.929  | 5.775  | 5.946  | 5.995  | 6.162  | 5.594  | 8.527  | 6.16   | 6.817  | 6.714   | 0.00327   | 0.48031 | 0.45058 | 0.28102       | 0.17749 | 0.02284 | 0.09033 | 0.44875        | 0.24127  | -1.59499       |         |
| 2200002K05R1K   | RIKEN cDNA 2200002K05 gene       | A1843807    | 9  | 5.345  | 5.793  | 6.531  | 6.855  | 7.789  | 6.895  | 6.984  | 6.187  | 6.073  | 4.907  | 6.318  | 6.17   | 7.114  | 5.806  | 6.713  | 5.568  | 6.618  | 5.818  | 6.872  | 6.924   | 0.93837   | 0.55099 | 0.75481 | 0.34109       | 0.66609 | 0.01333 | 0.08211 | 0.74171        | 0.16196  | 1.24341        |         |
| 2210009G21R1K   | RIKEN cDNA 2210009G21 gene       | BG067245    | 2  | 6.879  | 7.052  | 6.139  | 6.362  | 6.781  |        | 6.794  | 6.851  | 7.279  | 5.991  | 6.369  | 6.796  | 6.404  | 6.325  | 6.089  | 6.836  | 5.905  |        | 6.204  | 6.092   | 0.26304   | 0.41504 | 0.21190 | 0.23168       | 0.78534 | 0.01325 | 0.06841 | 0.43512        | 0.39119  | -2.26726       |         |
| 2210010B09R1K   | RIKEN cDNA 2210010B09 gene       | BG075162    | 9  | 6.28   | 7.976  | 6.728  | 7.748  | 7.599  | 8.285  | 7.534  | 6.957  | 7.231  | 9.554  | 7.182  | 7.026  | 7.711  | 6.883  | 7.15   | 7.025  | 7.587  | 7.298  | 7.087  | 6.375   | 0.59247   | 0.47463 | 0.13762 | 0.21491       | 0.28868 | 0.01668 | 0.11335 | 0.46088        | 0.01721  | -0.37430       |         |
| 2210010C17R1K   | RIKEN cDNA 2210010C17 gene       | BG068174    | 7  | 7.892  | 6.833  | 5.807  | 5.823  | 5.445  | 7.826  | 7.42   | 6.727  | 6.687  | 6.884  | 7.809  | 7.495  | 5.567  | 7.597  | 7.04   | 7.821  | 6.078  | 5.504  | 7.239  | 6.38    | 0.91491   | 0.54565 | 0.82591 | 0.35557       | 0.80357 | 0.01325 | 0.09079 | 0.76494        | 0.00651  | -0.22888       |         |
| 2210010L05R1K   | RIKEN cDNA 2210010L05 gene       | A1850496    | 1  | 9.26   | 8.994  | 8.872  | 6.807  | 9.065  | 8.41   | 8.543  | 9.124  | 8.822  | 8.353  | 9.033  | 9.555  | 9.097  | 8.204  | 9.539  | 8.805  | 9.148  | 8.966  | 8.988  | 8.194   | 0.65125   | 0.48719 | 0.50299 | 0.29126       | 0.12368 | 0.03435 | 0.44263 | 0.61987        | 0.00860  | -0.26346       |         |
| 2210010N04R1K   | RIKEN cDNA 2210010N04 gene       | BQ554098    | 5  | 4.444  | 5.125  | 7.475  | 5.741  | 4.907  | 12.509 | 5.385  | 7.022  | 6.232  | 4.635  | 4.883  | 6.625  | 5.229  | 5.114  | 4.98   | 5.811  | 4.134  | 4.115  | 5.466  | 5.891   | 0.78718   | 0.51715 | 0.19128 | 0.22707       | 0.30999 | 0.01674 | 0.17371 | 0.49475        | 0.00067  | -0.06741       |         |
| 2210011C24R1K   | RIKEN cDNA 2210011C24 gene       | A1854664    | 8  | 6.49   | 6.159  | 6.644  | 6.637  | 6.63   | 4.973  | 6.852  | 6.21   | 6      | 5.737  | 5.559  | 6.774  | 5.513  | 5.115  | 6.532  | 6.974  | 6.013  | 5.4    | 5.991  | 6.046   | 0.13321   | 0.40817 | 0.78245 | 0.34667       | 0.12107 | 0.03571 | 0.04564 | 0.60927        | 0.35413  | 0.29438        |         |
| 2210012G02R1K   | RIKEN cDNA 2210012G02 gene       | A1415097    | 4  | 6.848  | 7.231  | 7.479  | 6.247  | 7.381  | 5.326  | 7.7    | 7.143  |        | 6.844  | 7.266  |        | 8.262  | 5.522  | 7.74   | 6.876  | 7.217  | 7.235  | 8.303  | 7.679   | 0.27683   | 0.41673 | 0.10970 | 0.20836       | 0.13901 | 0.01605 | 0.04788 | 0.42151        | 0.05040  | -0.65160       |         |
| 2210013O21R1K   | RIKEN cDNA 2210013O21 gene       | A1846437    | X  | 10.655 | 10.286 | 10.569 | 10.196 | 9.664  | 9.977  | 10.162 | 10.097 | 10.028 | 10.17  | 10.033 | 10.155 | 7.597  | 10.456 | 10.1   | 9.814  | 10.399 | 10.327 | 10.289 |         | 0.43860   | 0.44392 | 0.51909 | 0.29439       | 0.38542 | 0.01484 | 0.50168 | 0.64254        | 0.20823  | -1.45051       |         |
| 2210015D19R1K   | RIKEN cDNA 2210015D19 gene       | A1843538    | 11 | 7.445  | 7.903  | 8.189  | 7.755  | 7.583  | 8.207  | 7.722  | 7.01   | 7.32   | 7.392  | 7.509  | 7.71   | 7.01   | 7.823  | 8.119  | 7.702  | 7.527  | 7.954  |        | 0.13965 | 0.40793   | 0.23130 | 0.23597 | 0.33968       | 0.01553 | 0.09277 | 0.75713 | 0.03910        | -0.57053 |                |         |
| 2210016L21R1K   | RIKEN cDNA 2210016L21 gene       | A1847865    | 5  | 7.054  | 7.509  | 6.599  | 8.027  | 7.269  | 6.299  | 6.454  | 6.758  | 7.487  | 6.749  | 7.273  | 8.43   | 6.229  | 7.744  | 7.162  | 7.539  | 7.494  | 7.628  | 7.78   | 6.496   | 0.86491   | 0.53440 | 0.07072 | 0.19870       | 0.12143 | 0.03521 | 0.19577 | 0.50633        | 0.10345  | -0.96079       |         |
| 2210018M11R1K   | RIKEN cDNA 2210018M11 gene       | A1426173    | 7  | 5.893  | 5.998  | 7.161  | 5.623  | 4.313  |        | 5.879  | 6.687  | 5.834  | 5.7    | 4.787  |        | 2.857  | 5.413  | 4.222  |        | 6.479  | 5.306  | 6.333  | 4.787   | 0.07389   | 0.41504 | 0.54436 | 0.29932       | 0.69283 | 0.01329 | 0.08548 | 0.44579        | 0.64944  | <b>3.84974</b> |         |
| 2210021J22R1K   | RIKEN cDNA 2210021J22 gene       | A1849739    | 15 | 7.65   | 7.285  | 7.086  | 6.34   | 7.016  | 7.862  | 7.485  | 5.952  | 5.719  | 7.612  | 6.836  | 7.964  | 7.045  | 7.687  | 7.113  | 7.244  |        | 6.84   | 7.598  | 6.988   | 6.93      | 0.42498 | 0.44136 | 0.69136       | 0.32842 | 0.77234 | 0.01324 | 0.41326        | 0.60791  | 0.00043        | 0.05834 |
| 2210040J11R1K   | Hypothetical protein LOC10041621 | A1448938    | 17 | 8.217  | 7.983  | 7.898  | 6.693  | 7.413  | 7.751  | 8.003  | 8.5    | 8.449  | 9.389  | 8.147  |        | 8.276  | 8.031  | 7.99   |        | 8.119  | 8.073  | 7.872  | 8.262   | 0.78164   | 0.51593 | 0.75669 | 0.34146       | 0.31135 | 0.01611 | 0.92331 | 0.75405        | 0.13353  | -1.11036       |         |
| 2210048F21R1K   | RIKEN cDNA 2210048F21 gene       | BG072395    | 6  | 7.095  | 7.355  | 7.131  | 7.399  | 6.858  | 7.612  | 4.794  | 6.923  | 7.15   | 6.195  | 7.3    | 7.032  | 7.951  | 5.519  | 6.916  | 6.164  | 7.072  | 6.655  | 6.393  | 6.839   | 0.60002   | 0.47627 | 0.86352 | 0.36346       | 0.24241 | 0.01828 | 0.84482 | 0.73807        | 0.00016  | 0.03589        |         |
| 2210048B21R1K   | RIKEN cDNA 2210048B21 gene       | A1837386    | 13 | 7.091  | 7.396  | 6.906  | 7.791  | 7.746  | 8.128  | 7.559  | 8.82   | 7.393  | 8.091  | 7.932  | 7.426  | 7.441  | 8.319  | 7.937  | 7.937  | 8.188  | 8.041  | 8.057  | 7.777   | 0.69690   | 0.41604 | 0.72204 | 0.33454       | 0.05423 | 0.12043 | 0.37158 | 0.59008        | 0.29554  | -1.83199       |         |
| 2210041D20I1R1K | RIKEN cDNA 2210041D20I gene      | BQ553804    | 7  | 5.382  | 6.044  | 10.487 | 6.135  | 5.301  |        | 5.679  | 5.773  | 5.855  | 5.866  | 5.554  | 6.959  | 6.329  | 6.358  | 6.45   | 6.129  | 6.88   | 7.08   | 5.877  | 5.653   | 0.74074   | 0.50686 | 0.13577 | 0.21448       | 0.45149 | 0.01418 | 0.98609 | 0.76598        | 0.00114  | 0.09552        |         |
| 2210001A20R1K   | RIKEN cDNA 2210001A20 gene       | A1847215    | 2  | 2.904  | 5.037  | 4.007  | 4.978  | 3.691  |        | 7.775  | 5.582  | 5.954  | 5.746  | 4.524  | 10.6   | 4.652  | 0.825  | 3.721  | 6.691  | 4.36   | 4.601  | 3.126  | 5.582   | 0.67485   | 0.49231 | 0.13083 | 0.21333       | 0.01228 | 0.45373 | 0.28419 | 0.55002        | 0.00523  | -0.20510       |         |
| 2210002B06R1K   | RIKEN cDNA 2210002B06 gene       | A1428377    | 17 | 7.02   | 8.025  | 7.175  | 7.38   | 7.033  | 7.957  | 7.939  | 7.667  | 7.445  | 7.667  | 8.179  | 7.68   | 7.366  | 8.204  | 7.729  | 8.129  | 7.156  | 8.112  | 9.252  | 8.297   | 0.31764   | 0.42259 | 0.22777 | 0.23519       | 0.43838 | 0.01429 | 0.10649 | 0.45816        | 0.04485  | -0.61290       |         |
| 2210002J21R1K   | RIKEN cDNA 2210002J21 gene       | A1848627    | 19 | 10.074 | 10.48  | 10.474 | 9.397  | 9.974  | 10.688 | 9.908  | 10.144 | 10.119 | 10.680 | 10.121 | 9.958  | 10.331 | 10.201 | 9.976  | 9.357  | 10.199 | 9.178  | 10.391 | 10.124  | 0.86304   | 0.53398 | 0.18470 | 0.22559       | 0.49065 | 0.01391 | 0.30397 | 0.55936        | 0.00075  | 0.07757        |         |
| 2210003C23R1K   | RIKEN cDNA 2210003C23 gene       | A1843796    | 2  | 6.15   | 7.043  | 7.503  | 7.29   | 7.652  | 8.115  | 6.47   | 7.59   | 7.792  | 6.817  | 7.687  | 7.361  | 7.373  | 6.432  | 6.822  | 6.323  | 7.176  | 6.383  | 7.179  | 7.116   | 0.97454   | 0.55938 | 0.19190 | 0.22721       | 0.58814 | 0.01351 | 0.31319 | 0.56366        | 0.44471  | <b>2.59136</b> |         |
| 2210003F16R1K   | RIKEN cDNA 2210003F16 gene       | A1847440    | 2  | 4.833  | 3.148  | 2.628  | 3.33   | 3.657  | 7.617  | 10.003 | 6.262  | 3.533  | 4.434  | 5.187  | 3.93   | 3.248  | 4.211  | 6.556  | 4.087  | 3.664  | 3.674  | 2.352  | 3.918   | 0.15807   | 0.40769 | 0.02616 | 0.18560       | 0.02937 | 0.23559 | 0.24106 | 0.52929        | 0.00289  | -0.15234       |         |
| 2210003H1R1K    | RIKEN cDNA 2210003H1 gene        | A1835971    | 11 | 6.87   | 5.497  | 4.61   | 6.15   | 7.311  |        | 4.9    | 4.962  | 4.858  | 5.681  | 6.369  | 7.872  | 7.109  | 6.138  | 6.083  | 6.833  | 6.192  | 6.595  | 5.296  | 6.171   | 0.32016   | 0.42298 | 0.01389 | 0.18161       | 0.12880 | 0.01272 | 0.04603 | 0.42021        | 0.0026   | 0.13456        |         |
| 2210003L21R1K   | RIKEN cDNA 2210003L21 gene       | BQ556924    | 2  | 5.429  | 5.59   | 5.209  | 6.083  | 6.044  | 5.594  | 3.666  | 5.909  | 5.667  | 6.559  | 5.764  | 5.34   | 4.99   | 6.044  | 6.301  | 7.732  | 5.928  | 5.781  | 5.285  | 5.146   | 0.95551   | 0.55494 | 0.40589 | 0.28190       | 0.66860 | 0.01333 | 0.44747 | 0.62073        | 0.00303  | 0.01546        |         |
| 2210004J22R1K   | RIKEN cDNA 2210004J22 gene       | BQ565268    | 11 | 5.257  | 8.31   | 5.865  | 4.248  | 3.865  | 7.31   | 6.294  | 5.647  | 5.049  | 4.335  | 4.598  | 4.163  | 4.341  | 5.672  | 5.22   | 5.845  | 6.532  | 5.205  | 5.416  |         | 0.46353   | 0.44868 | 0.93790 | 0.37921       | 0.82187 | 0.01326 | 0.50259 | 0.64288        | 0.38309  | -2.22888       |         |
| 2210004N24R1K   | RIKEN cDNA 2210004N24 gene       | A1846684    | 6  | 6.199  | 6.358  | 5.907  | 6.029  | 5.326  |        | 6.215  | 6.147  | 6.363  | 7.648  | 6.262  | 6.31   | 6.19   | 4.811  | 5.807  | 6.256  | 6.846  | 6.71   | 5.256  | 6.421   | 0.79791   | 0.51953 | 0.53812 | 0.29810       | 0.13294 | 0.03127 | 0.59989 | 0.67588        | 0.00281  | -1.50111       |         |
| 2210005E10R1K   | RIKEN cDNA 2210005E10 gene       | CK334441    | 6  | 10.302 | 9.798  | 9.635  | 9.819  | 9.929  | 9.982  | 9.581  | 9.754  | 9.685  | 9.669  | 9.647  | 9.814  | 9.771  | 9.168  | 9.806  | 9.407  | 9.707  | 9.829  | 9.26   | 9.867   | 0.35235   | 0.42826 | 0.40801 | 0.27260       | 0.94829 | 0.01353 | 0.10414 | 0.50023        | 0.00600  | <b>3.50776</b> |         |
| 2210005N01R1K   | RIKEN cDNA 2210005N01 gene       | A1852746    | 4  | 7.954  | 9.807  | 9.614  | 8.864  | 8.1    | 8.809  | 8.333  | 8.621  | 9.094  | 8.41   | 8.426  | 8.557  | 8.499  | 8.347  | 8.141  | 7.91   | 7.973  | 8.776  | 8.449  | 8.577   | 0.31517   | 0.42220 | 0.18648 | 0.22599       | 0.83609 | 0.01327 | 0.08859 | 0.44769        | 0.09093  | 0.89452        |         |
| 2210005N03R1K   | RIKEN cDNA 2210005N03 gene       | A1843155    | 1  | 9.927  | 10.189 | 10.248 | 10.305 | 9.955  | 9.958  | 10.128 | 10.016 | 10.076 | 9.607  | 9.867  | 9.957  | 9.499  | 10.322 | 10.153 | 9.982  | 10.296 | 10.033 |        | 9.976   | 0.33079   | 0.42468 | 0.38481 | 0.26795       | 0.20034 | 0.02068 | 0.76625 | 0.71975        | 0.       |                |         |

| Gene Symbol   | Name                       | Accession # | Ch | P30_C1 | P30_C2 | P30_C3 | P30_C4 | P30_C5 | P70_C1 | P70_C2 | P70_C3 | P70_C4 | P70_C5 | P30_E1 | P30_E2 | P30_E3 | P30_E4 | P30_E5 | P70_E1 | P70_E2 | P70_E3 | P70_E4 | P70_E5 | P30 Cve p | P30 FDR | P70 Cve p | P70 FDR | P30C v P70C v | Age FDR | Cve FDR | r <sup>2</sup> | t       |          |         |
|---------------|----------------------------|-------------|----|--------|--------|--------|--------|--------|--------|--------|--------|--------|--------|--------|--------|--------|--------|--------|--------|--------|--------|--------|--------|-----------|---------|-----------|---------|---------------|---------|---------|----------------|---------|----------|---------|
| 2400003C14RIK | RIKEN cDNA 2400003C14 gene | BG065091    | 8  | 6.026  | 6.662  | 6.237  | 6.771  | 7.58   | 8.718  | 7.388  |        | 6.931  | 6.898  | 6.782  | 8.057  | 8.19   | 7.04   | 7.235  | 6.752  | 6.581  | 6.633  | 7.119  | 7.201  | 0.07170   | 0.41551 | 0.16245   | 0.22057 | 0.12961       | 0.03229 | 0.67173 | 0.69688        | 0.31104 | 1.90046  |         |
| 2400003C12RIK | RIKEN cDNA 2400003C12 gene | A1849486    | 2  | 9.466  | 9.559  | 9.357  | 9.784  | 9.673  | 9.663  | 9.548  | 9.408  | 8.965  | 9.574  | 9.331  | 9.339  | 9.327  | 9.029  | 9.455  | 8.989  | 9.36   | 9.242  | 9.301  | 9.626  | 0.03018   | 0.43052 | 0.41568   | 0.27413 | 0.37389       | 0.01499 | 0.40424 | 0.41894        | 0.06828 | 0.76566  |         |
| 2400002F23RIK | RIKEN cDNA 2400002F23 gene | A1850896    | 7  | 7.601  | 7.166  | 7.451  | 6.655  | 8.254  | 7.493  | 8.348  | 7.982  | 7.607  | 6.431  | 7.634  | 8.05   | 7.073  | 6.599  | 7.888  | 7.987  | 7.451  | 7.89   | 7.025  | 7.276  | 0.83538   | 0.52782 | 0.91197   | 0.37361 | 0.90133       | 0.01338 | 0.80843 | 0.73018        | 0.00021 | 0.40072  |         |
| 2400002021RIK | RIKEN cDNA 2400002021 gene | AA055132    | 11 | 7.508  | 7.669  | 7.938  | 7.28   | 7.166  | 8.356  | 6.113  | 7.071  | 8.66   | 6.912  | 7.476  |        | 6.472  | 6.786  | 7.017  | 7.044  | 7.523  | 6.989  | 5.595  | 7.001  | 0.04977   | 0.42173 | 0.54204   | 0.29887 | 0.86029       | 0.03130 | 0.12830 | 0.47030        | 0.38169 | 2.22228  |         |
| 2400002202RIK | RIKEN cDNA 2400002022 gene | BQ556225    | 13 | 8.475  | 8.583  | 7.954  | 8.388  | 8.863  | 9.131  | 8.639  | 8.733  | 8.518  | 9.587  | 8.869  | 8.745  | 8.354  | 8.843  | 8.197  | 8.46   | 8.743  | 8.587  | 8.808  | 9.381  | 0.70016   | 0.49787 | 0.63062   | 0.31634 | 0.09228       | 0.05190 | 0.89029 | 0.74749        | 0.03470 | 0.53625  |         |
| 2400003J6RIK  | RIKEN cDNA 2400003J6 gene  | A1448380    | X  | 7.594  | 5.639  | 5.858  | 5.093  | 5.413  | 5.629  | 8.432  | 5.248  | 6.897  | 5.452  | 6.27   | 7.993  | 5.458  | 7.237  | 5.342  | 4.868  | 5.634  | 5.88   | 5.368  | 5.252  | 0.44530   | 0.44519 | 0.08917   | 0.20338 | 0.41271       | 0.01453 | 0.53662 | 0.65503        | 0.00030 | 0.04887  |         |
| 2400004A18RIK | RIKEN cDNA 2400004A18 gene | A1845960    | 3  | 9.515  | 9.566  | 9.849  | 8.985  | 9.952  | 9.579  | 9.797  | 9.833  | 10.02  | 9.541  | 9.624  | 9.879  | 10.013 | 9.784  | 10.291 | 9.813  | 10.069 | 10.033 | 9.774  | 10.123 | 9.919     | 0.05046 | 0.42149   | 0.07653 | 0.20020       | 0.52191 | 0.01375 | 0.04843        | 0.38318 | 0.14663  | 1.17245 |
| 2400004L22RIK | RIKEN cDNA 2400004L22 gene | BQ642200    | 8  | 5.398  | 5.591  | 6.582  | 6.765  | 7.409  | 13.036 | 7.119  | 5.605  | 3.68   | 7.644  | 6.331  | 6.368  | 7.644  | 5.872  | 6.499  | 5.354  | 5.332  | 6.074  | 5.644  | 6.029  | 0.79540   | 0.51898 | 0.30327   | 0.25123 | 0.55159       | 0.01363 | 0.32935 | 0.57111        | 0.32943 | -1.98246 |         |
| 2400005016RIK | RIKEN cDNA 2400005016 gene | BQ558959    | 4  | 7.322  | 7.692  | 7.79   | 7.566  | 7.929  | 7.756  | 8.16   | 7.829  | 7.017  | 6.512  | 7.513  | 7.239  | 7.342  | 7.184  | 7.271  | 7.984  | 7.261  | 7.702  | 7.146  | 8.103  | 0.10744   | 0.44539 | 0.49693   | 0.29007 | 0.43533       | 0.01433 | 0.62323 | 0.70242        | 0.08282 | -0.79265 |         |
| 2400008K3RIK  | RIKEN cDNA 2400008K3 gene  | A1428012    | 11 | 7.738  | 7.013  | 6.796  | 6.565  | 7.97   | 7.43   | 6.768  | 7.232  | 6.845  | 7.345  | 8.006  | 7.359  | 7.678  | 7.104  | 7.64   | 7.941  | 7.124  | 7.595  | 7.41   | 7.566  | 0.30636   | 0.42085 | 0.06514   | 0.19725 | 0.76661       | 0.01324 | 0.04363 | 0.41950        | 0.26925 | 1.71686  |         |
| 2400012H2RIK  | RIKEN cDNA 240012H2 gene   | A1852016    | 11 | 9.969  | 9.409  | 9.472  | 9.763  | 10.299 | 9.345  | 9.003  | 9.246  | 8.769  | 7.819  | 9.147  | 9.207  | 9.232  | 9.057  | 9.207  | 9.162  | 9.134  | 9.474  | 9.151  | 9.241  | 0.00631   | 0.45192 | 0.12171   | 0.22253 | 0.06511       | 0.52463 | 0.23501 | 0.52560        | 0.06449 | 0.74263  |         |
| 2400014A08RIK | RIKEN cDNA 240014A08 gene  | BQ556604    | 5  | 6.576  | 7.022  | 7.847  | 5.686  | 7.305  |        | 6.714  | 5.705  | 6.35   | 5.222  | 5.909  | 6.186  | 5.848  | 6.062  | 6.989  | 6.165  | 6.399  | 6.198  | 10.437 | 5.899  | 0.13866   | 0.40797 | 0.30129   | 0.25082 | 0.12202       | 0.03498 | 0.76393 | 0.72005        | 0.02730 | -0.47387 |         |
| 2400015M2RIK  | RIKEN cDNA 240015M20 gene  | BQ072356    | 17 | 10.296 | 9.868  | 9.963  | 9.683  | 10.361 | 10.087 | 9.9    | 9.468  | 9.357  | 9.461  | 9.724  | 9.813  | 10.156 | 10.044 | 9.919  | 9.597  | 10.029 | 10.078 | 10.417 | 10.493 | 0.18290   | 0.40829 | 0.30523   | 0.25164 | 0.02042       | 0.12747 | 0.95116 | 0.75940        | 0.08239 | -2.23926 |         |
| 2400015N17RIK | RIKEN cDNA 240015N17 gene  | A1854235    | 7  | 5.582  | 5.379  | 4.907  | 6.055  | 6.732  | 3.047  | 3.462  | 4.273  | 5.775  | 5.227  | 6.164  | 5.565  | 6.632  | 7.306  | 6.831  | 6.463  | 5.826  | 6.356  | 6.199  | 6.666  | 0.11158   | 0.40957 | 0.00652   | 0.17849 | 0.05154       | 0.12342 | 0.00308 | 0.38061        | 0.02586 | 0.46085  |         |
| 2400016G06RIK | RIKEN cDNA 240016G06 gene  | BQ074130    | 12 | 3.017  | 4.241  | 5.508  | 5.492  | 4.148  | 5.47   | 4.811  | 7.19   | 5.535  | 5.388  | 5.351  | 6.133  | 8.344  | 3.359  | 5.525  | 8.255  | 5.032  | 4.982  | 4.686  | 4.677  | 0.21081   | 0.40995 | 0.51336   | 0.29328 | 0.08752       | 0.05609 | 0.17638 | 0.49616        | 0.03087 | -0.50480 |         |
| 2400017P07RIK | RIKEN cDNA 240017P07 gene  | BQ074883    | 10 | 6.822  | 6.287  | 6.743  | 5.997  | 7.095  | 7.673  | 5.375  | 6.19   | 6.053  | 7.828  | 6.227  | 7.209  | 6.321  | 6.719  | 5.979  | 6.334  | 5.79   | 6.139  | 6.40   | 6.068  | 0.78407   | 0.51646 | 0.29343   | 0.24918 | 0.94795       | 0.01352 | 0.27070 | 0.54362        | 0.00120 | -0.09820 |         |
| 2400017P09RIK | RIKEN cDNA 240017P09 gene  | BG063352    | 12 | 4.537  | 5.353  | 4.6    | 5.837  | 4.082  | 5.507  | 6.266  | 5.872  | 6.614  | 5.769  | 6.476  | 6.591  | 6.411  | 5.349  | 6.115  | 4.044  | 5.784  | 5.28   | 5.708  | 4.652  | 0.00955   | 0.44697 | 0.01708   | 0.18281 | 0.00589       | 0.52687 | 0.80161 | 0.72865        | 0.04536 | 0.61656  |         |
| 2400018C17RIK | RIKEN cDNA 240018C17 gene  | BG073877    | 5  | 5.944  | 7.339  | 7.524  | 6.508  | 6.491  | 6.35   | 6.333  | 5.72   | 6.977  | 6.863  | 7.524  | 5.746  | 6.015  | 5.623  | 6.244  | 6.111  | 7.087  |        |        |        | 0.27175   | 0.41609 | 0.50846   | 0.29232 | 0.42092       | 0.01454 | 0.49748 | 0.64099        | 0.00059 | 0.60583  |         |
| 2400018G20RIK | RIKEN cDNA 240018G20 gene  | BQ072099    | 16 | 9.232  | 9.564  | 9.662  | 9.465  | 10.16  | 9.535  | 10.003 | 9.807  | 8.994  | 9.778  | 10.106 | 9.501  | 9.877  | 9.342  | 9.121  | 10.551 | 9.764  | 9.854  | 9.695  | 9.837  | 0.91089   | 0.54474 | 0.21144   | 0.23158 | 0.97734       | 0.01364 | 0.39684 | 0.60100        | 0.24360 | 1.60513  |         |
| 2400018M08RIK | RIKEN cDNA 240018M08 gene  | BQ558696    | 5  | 4.907  | 5.672  | 6.373  | 6.555  | 6.607  | 3.963  | 3.285  | 4.465  | 7.533  | 5.353  | 5.87   | 5.748  | 3.585  | 4.87   | 5.892  | 5.285  | 4.807  | 5.333  | 3.681  | 4.77   | 0.27168   | 0.41608 | 0.79764   | 0.34977 | 0.16347       | 0.02471 | 0.69421 | 0.70290        | 0.00707 | -0.23864 |         |
| 2400019A14RIK | RIKEN cDNA 240019A14 gene  | A1837125    | 3  | 6.056  | 5.786  | 8.556  | 7.626  | 7.712  | 6.409  | 5.584  | 6.506  | 6.39   | 7.626  | 6.926  | 6.56   | 6.987  | 6.704  | 7.568  | 6.541  | 6.256  | 7.082  | 6.629  | 6.691  | 0.23983   | 0.41249 | 0.74584   | 0.33929 | 0.08925       | 0.05450 | 0.49983 | 0.64186        | 0.06604 | 0.75210  |         |
| 240002Z05RIK  | RIKEN cDNA 24002Z05 gene   | BG067186    | 8  | 5.902  | 6.11   | 7.015  | 7.28   | 5.689  | 6.9    | 7.148  | 8.134  | 7.152  | 7.571  | 7.113  | 7.215  | 6.777  | 6.846  | 7.033  | 7.931  | 7.84   | 7.002  | 5.015  | 7.179  | 0.10737   | 0.40997 | 0.51531   | 0.29352 | 0.03341       | 0.21937 | 0.77445 | 0.72249        | 0.03765 | -0.55941 |         |
| 240002Z5L0RIK | RIKEN cDNA 24002Z5L10 gene | A1839046    | 5  | 6.463  | 5.86   | 6.455  | 5.726  | 6.646  | 3.031  | 6.41   | 6.851  | 6.026  | 7.678  | 6.565  | 6.228  | 0      | 6.844  | 6.044  | 5.858  | 6.087  | 6.245  | 5.558  | 6.422  | 0.39910   | 0.43658 | 0.32317   | 0.25537 | 0.24838       | 0.18083 | 0.92795 | 0.73479        | 0.02529 | 0.45561  |         |
| 2400066E13RIK | RIKEN cDNA 240066E13 gene  | A1850678    | 6  | 11.031 | 10.276 | 10.794 | 10.969 | 10.769 | 10.711 | 11.371 | 10.942 | 10.303 | 11.497 | 10.654 | 10.883 | 10.614 | 11.079 | 11.176 | 10.659 | 10.772 | 11.271 | 11.217 | 10.787 | 0.53147   | 0.46208 | 0.92763   | 0.37698 | 0.46249       | 0.01410 | 0.76531 | 0.72037        | 0.13385 | 1.11188  |         |
| 2400076I2RIK  | RIKEN cDNA 240076I2 gene   | BQ560455    | 9  | 4.62   | 4.7    | 5.562  | 5.058  | 6.767  | 11.17  | 5.397  | 6.202  | 5.787  | 6.21   | 8.814  | 5.34   | 5.225  | 6.322  | 6.957  | 4.804  | 5.917  | 7.142  |        |        | 0.15038   | 0.47272 | 0.57243   | 0.30484 | 0.31265       | 0.01608 | 0.11245 | 0.46150        | 0.25035 | -1.63451 |         |
| 2400091C18RIK | RIKEN cDNA 240091C18 gene  | A4465280    | 17 | 9.884  | 9.785  | 9.818  | 9.737  | 10.16  | 9.796  | 10.236 | 9.905  | 9.533  | 10.436 | 7.922  | 8.258  | 10.088 | 9.291  | 9.846  | 9.431  | 8.857  | 9.778  | 9.221  | 9.679  | 0.10439   | 0.41028 | 0.04043   | 0.18851 | 0.57994       | 0.01357 | 0.00946 | 0.38885        | 0.02773 | 0.47767  |         |
| 2400127E18RIK | RIKEN cDNA 2400127E18 gene | BQ075517    | 6  | 6.222  | 6.454  | 6.612  | 7.026  | 6.759  | 6.023  | 6.115  | 6.469  | 7.359  | 6.223  | 6.737  | 4.02   | 6.448  | 7.07   | 6.414  | 7.305  | 7.06   | 8.085  | 7.494  | 7.791  | 0.41561   | 0.43962 | 0.00623   | 0.17835 | 0.41561       | 0.13167 | 0.00791 | 0.38701        | 0.00078 | 0.07899  |         |
| 2400127L17RIK | RIKEN cDNA 2400127L17 gene | BQ072749    | 19 | 6.429  | 6.293  | 7.567  | 7.024  | 7.92   | 8.428  | 8.088  | 7.058  | 7.54   | 7.493  | 7.302  | 7.417  | 7.599  | 7.366  | 7.65   | 7.665  | 7.369  | 7.358  | 7.338  |        | 0.33173   | 0.42483 | 0.19872   | 0.22874 | 0.13330       | 0.03116 | 0.00703 | 0.76305        | 0.35762 | -1.11038 |         |
| 2400129H14RIK | RIKEN cDNA 2400129H14 gene | A1853381    | 14 | 9.328  | 9.237  | 9.695  | 9.393  | 9.218  | 9.758  | 9.918  | 9.519  | 9.909  | 8.717  | 9.715  | 9.459  | 10.038 | 9.126  | 9.615  | 9.852  | 9.634  | 9.539  | 9.63   | 9.838  | 0.24613   | 0.41314 | 0.57871   | 0.30608 | 0.45102       | 0.01418 | 0.23032 | 0.52397        | 0.04607 | 0.62157  |         |
| 2400131K12RIK | RIKEN cDNA 2400131K12 gene | BQ557904    | 5  | 4.726  | 6.816  | 7.251  | 5.526  | 4.13   | 7.539  | 11.969 | 5.853  | 6.525  | 3.807  | 7.422  | 6.51   | 5.26   | 3.61   | 4.757  | 6.716  | 10.014 | 10.003 | 9.48   | 6.892  | 0.69557   | 0.49686 | 0.63349   | 0.31691 | 0.35581       | 0.01526 | 0.81356 | 0.73130        | 0.03919 | 0.57116  |         |
| 2400166G05RIK | RIKEN cDNA 2400166G05 gene | A1842137    | 4  | 4.973  | 4.322  | 4.437  | 5.121  | 4.559  | 8.943  | 12.638 | 11.957 | 6.843  | 7.812  | 4.495  | 3.875  | 4.036  | 6.232  | 5.329  | 4.151  | 10.19  | 4.16   | 3.638  | 3.805  | 0.81175   | 0.52393 | 0.03170   | 0.18776 | 0.05610       | 0.53264 | 0.09040 | 0.44179        | 0.19024 | 1.37092  |         |
| 2400187C16RIK | RIKEN cDNA 2400187C16 gene | BG073505    | 15 | 6.256  | 7.05   | 7.418  | 6.505  | 6.505  | 3.73   | 5.409  | 4.507  | 5.798  | 7.582  | 6.473  | 6.066  | 7.31   | 7.026  | 6.373  | 7.479  | 5.985  | 6.388  | 6.077  | 6.074  | 0.56170   | 0.46823 | 0.24245   | 0.23841 | 0.27640       | 0.0170  |         |                |         |          |         |

| Gene Symbol   | Name                              | Accession # | Ch | P30_C1 | P30_C2 | P30_C3 | P30_C4 | P30_C5 | P70_C1 | P70_C2 | P70_C3 | P70_C4 | P70_C5 | P30_E1 | P30_E2 | P30_E3 | P30_E4 | P30_E5 | P70_E1 | P70_E2 | P70_E3 | P70_E4  | P70_E5  | P30_CvE p | P30_FDR | P70_CvE p | P70_FDR | P30C v P70C p | Age FDR p | CvE p   | CvE FDR p | r <sup>2</sup> | t        |          |
|---------------|-----------------------------------|-------------|----|--------|--------|--------|--------|--------|--------|--------|--------|--------|--------|--------|--------|--------|--------|--------|--------|--------|--------|---------|---------|-----------|---------|-----------|---------|---------------|-----------|---------|-----------|----------------|----------|----------|
| 2700081O15RIK | RIKEN cDNA 2700081O15 gene        | A1415721    | 19 | 7.202  | 5.585  | 6.431  | 6.871  | 6.996  | 6.066  | 7.474  | 6.355  | 6.723  | 7.622  | 7.54   | 7.765  | 7.224  | 7.925  | 7.411  | 7.137  | 6.217  | 5.877  | 6.238   | 6.939   | 0.01573   | 0.44010 | 0.37143   | 0.26525 | 0.59647       | 0.01349   | 0.33781 | 0.57496   | 0.19186        | 1.37815  |          |
| 2700089E24RIK | RIKEN cDNA 2700089E24 gene        | A1837334    | 6  | 10.613 | 10.567 | 10.811 | 11.013 | 10.741 | 10.557 | 10.989 | 10.711 | 10.649 | 10.766 | 10.503 | 10.348 | 10.492 | 10.811 | 11.095 | 10.440 | 10.826 | 11.346 | 10.826  | 0.21279 | 0.41049   | 0.21303 | 0.23193   | 0.54553 | 0.01365       | 0.72252   | 0.71011 | 0.14035   | -1.14285       |          |          |
| 2700094K13RIK | RIKEN cDNA 2700094K13 gene        | A1413963    | 2  | 5.937  | 7.352  | 5.728  | 6.341  | 5.346  | 8.541  | 6.056  | 6.314  | 7.068  | 4.857  | 7.369  | 8.346  | 6.041  | 5.199  | 6.204  | 6.981  | 7.052  | 6.652  | 0.77018 | 0.51338 | 0.81773   | 0.35389 | 0.59572   | 0.01349 | 0.68961       | 0.70169   | 0.02978 | 1.04938   |                |          |          |
| 2700097O09RIK | RIKEN cDNA 2700097O09 gene        | BG065481    | 12 | 7.736  | 7.595  | 7.266  | 8.345  | 7.02   | 6.907  | 6.926  | 7.745  | 6.858  | 7.891  | 7.028  | 7.108  | 7.098  | 8.143  | 7.768  | 5.829  | 7.878  | 8.06   | 7.368   | 0.46639 | 0.44923   | 0.11502 | 0.20963   | 0.25991 | 0.01760       | 0.61440   | 0.68033 | 0.51220   | -2.89829       |          |          |
| 2700099C18RIK | RIKEN cDNA 2700099C18 gene        | BG066023    | 17 | 5.135  | 5.786  | 5.694  | 6.947  | 6.141  | 2.322  | 4.296  | 4.94   | 4.838  | 5.661  | 6.649  | 5.478  | 5.076  | 6.781  | 7.168  | 5.301  | 4.516  | 8.074  | 6.807   | 4.745   | 0.39905   | 0.43509 | 0.13250   | 0.21372 | 0.04384       | 0.15526   | 0.09674 | 0.45256   | 0.09475        | 0.91508  |          |
| 2810002I04RIK | RIKEN cDNA 2810002I04 gene        | AA052162    | 12 | 7.217  | 6.372  | 7.094  | 5.909  | 6.614  | 6.018  | 7.123  | 6.404  | 10.34  | 6.284  | 7.318  | 5.8    | 5.883  | 6.755  | 6.648  | 6.683  | 6.332  | 6.392  | 6.088   | 0.67789 | 0.49298   | 0.31350 | 0.25336   | 0.41745 | 0.01448       | 0.23272   | 0.52516 | 0.09710   | 0.92755        |          |          |
| 2810002O09RIK | RIKEN cDNA 2810002O09 gene        | BG08695     | 8  | 7.143  | 7.576  | 6.761  | 7.887  | 7.345  | 6.565  | 5.313  | 7.002  | 7.601  | 6.767  | 7.382  | 6.275  | 7.346  | 5.024  | 6.905  | 7.144  | 6.761  | 7.037  | 6.449   | 0.24218 | 0.41273   | 0.46201 | 0.28326   | 0.09291 | 0.05139       | 0.18979   | 0.50320 | 0.02036   | 1.37472        |          |          |
| 2810003C17RIK | RIKEN cDNA 2810003C17 gene        | A1854880    | 2  | 6.612  | 6.257  | 5.326  | 7.421  | 6.111  | 8.691  | 7.011  | 7.601  | 6.63   | 8.7    | 6.179  | 5.758  | 7.07   | 6.229  | 5.524  | 7.228  | 6.532  | 7.099  | 7.036   | 0.58744 | 0.47358   | 0.18136 | 0.22483   | 0.02961 | 0.01723       | 0.24468   | 0.52116 | 0.19446   | -1.38970       |          |          |
| 2810004N23RIK | RIKEN cDNA 2810004N23 gene        | BG071872    | 8  | 6.999  | 6.008  | 5.209  | 5.262  | 5.769  | 6.006  | 6.784  | 5.841  | 5.718  | 8.748  | 6.515  | 6.957  | 7.194  | 8.022  | 6.657  | 8.391  | 6.405  | 6.544  | 6.644   | 0.01969 | 0.43694   | 0.66647 | 0.32310   | 0.09479 | 0.01723       | 0.24468   | 0.52116 | 0.19446   | -1.38970       |          |          |
| 2810006G23RIK | RIKEN cDNA 2810006G23 gene        | BG071462    | 5  | 6.568  | 7.271  | 7.572  | 6.642  | 7.362  | 6.919  | 7.952  | 7.797  | 6.046  | 5.503  | 7.122  | 6.109  | 5.385  | 6.555  | 6.479  | 5.503  | 7.827  | 7.472  | 7.027   | 0.06381 | 0.41742   | 0.79480 | 0.34919   | 0.58416 | 0.01353       | 0.22324   | 0.52043 | 0.00010   | -0.02857       |          |          |
| 2810008D09RIK | RIKEN cDNA 2810008D09 gene        | A1451655    | 11 | 9.69   | 10.047 | 9.707  | 9.876  | 9.816  | 10.022 | 9.91   | 9.877  | 10.243 | 9.689  | 10.037 | 9.524  | 10.555 | 9.578  | 9.933  | 10.073 | 10.273 | 9.98   | 9.839   | 9.815   | 0.98940   | 0.56290 | 0.71159   | 0.33246 | 0.31082       | 0.01612   | 0.06078 | 0.72983   | 0.02447        | 0.44794  |          |
| 2810008M24RIK | RIKEN cDNA 2810008M24 gene        | A1430987    | 13 | 5.114  | 5.428  | 4.624  | 5.285  | 5.609  | 7.476  | 1.952  | 5.891  | 4.891  | 5.177  | 10.061 | 6.198  | 4.863  | 4.945  | 6.433  | 4.513  | 4.47   | 6.163  | 5.684   | 4.757   | 0.21596   | 0.41035 | 0.21326   | 0.23198 | 0.17816       | 0.02277   | 0.64561 | 0.68956   | 0.00090        | 0.04892  |          |
| 2810012G03RIK | Hypothetical protein LOC100041887 | BG078295    | 18 | 6.681  | 6.814  | 7.174  | 7.108  | 6.817  | 6.689  | 6.152  | 7.002  | 7.39   | 7.934  | 7.858  | 7.799  | 7.863  | 7.538  | 6.942  | 6.319  | 7.759  | 7.874  | 7.443   | 6.914   | 0.00589   | 0.44776 | 0.63517   | 0.31724 | 0.11444       | 0.03820   | 0.46869 | 0.57988   | 0.14324        | 1.15653  |          |
| 2810021B07RIK | RIKEN cDNA 2810021B07 gene        | BG076192    | 13 | 6.078  | 6.034  | 5.506  | 6.653  | 6.206  | 10.856 | 6.687  | 6.335  | 1.78   | 5.644  | 6.873  | 6.867  | 6.107  | 6.973  | 6.289  | 6.008  | 7.01   | 6.872  | 6.687   | 0.07255 | 0.41533   | 0.82271 | 0.35491   | 0.91260 | 0.01341       | 0.54606   | 0.65833 | 0.39167   | 2.26955        |          |          |
| 2810021J22RIK | RIKEN cDNA 2810021J22 gene        | BQ551740    | 11 | 5.376  | 5.303  | 3.755  | 5.045  | 3.71   | 5.862  | 5.585  | 6.209  | 4.967  | 6.433  | 5.523  | 5.555  | 6.054  | 5.149  | 4.891  | 3.49   | 4.748  | 5.407  | 6.667   | 7.273   | 0.07564   | 0.41467 | 0.69440   | 0.32903 | 0.01076       | 0.47402   | 0.50070 | 0.64218   | 0.03570        | 0.54418  |          |
| 2810022L02RIK | RIKEN cDNA 2810022L02 gene        | A1842453    | 1  | 6.425  | 3.303  | 6.43   | 6.008  | 6.644  |        | 7.428  | 7.184  | 6.862  | 7.48   | 7.364  | 6.122  | 6.833  | 7.163  | 6.96   | 5.993  | 6.301  | 6.264  | 7.966   | 6.655   | 0.12545   | 0.40856 | 0.18923   | 0.22661 | 0.07864       | 0.06580   | 0.45575 | 0.62508   | 0.14243        | 1.15269  |          |
| 2810025M15RIK | RIKEN cDNA 2810025M15 gene        | A1804458    | 1  | 5.921  | 7.016  | 7.188  | 5.881  | 5.358  | 6.769  | 6.482  | 6.263  | 7.077  | 6.35   | 6.508  | 7.246  | 5.885  | 4.478  | 6.158  | 6.505  | 6.024  | 6.271  | 5.252   | 6.23    | 0.58749   | 0.47359 | 0.07671   | 0.20025 | 0.43526       | 0.01431   | 0.48140 | 0.49881   | 0.34057        | -2.03267 |          |
| 2810026P18RIK | RIKEN cDNA 2810026P18 gene        | BG063482    | 9  | 7.34   | 6.654  | 6.11   | 7.359  | 6.997  | 6.633  | 5.575  | 6.78   | 6.258  | 7.033  | 5.936  | 7.08   | 7.329  | 5.512  | 7.329  | 7.145  | 6.95   | 5.725  | 7.443   | 6.363   | 0.58490   | 0.47304 | 0.54176   | 0.29881 | 0.25109       | 0.01793   | 0.98375 | 0.76544   | 0.02985        | 0.49615  |          |
| 2810030E01RIK | RIKEN cDNA 2810030E01 gene        | BQ555783    | 2  | 5.328  | 5.799  | 5.109  | 5.858  | 6.945  | 3.993  | 5.524  | 6.347  | 5.939  | 4.983  | 7.259  | 5.879  | 7.109  | 8.983  | 7.377  | 5.244  | 6.031  | 7.21   | 5.395   | 6.563   | 0.04418   | 0.42387 | 0.21946   | 0.23336 | 0.42044       | 0.01445   | 0.02247 | 0.42028   | 0.57028        | -2.58626 |          |
| 2810046L04RIK | RIKEN cDNA 2810046L04 gene        | BQ562258    | 3  | 3.125  | 3.378  | 5.082  | 5.333  | 4.128  | 7.285  | 4.607  | 4.742  | 5.244  | 4.7    | 5.666  | 5.693  | 4.7    | 4.881  | 5.681  | 4.358  | 4.624  | 3.459  | 4.91    | 0.66938 | 0.49112   | 0.28666 | 0.24747   | 0.79126 | 0.01325       | 0.34000   | 0.57595 | 0.00370   | 0.17228        |          |          |
| 2810055G20RIK | RIKEN cDNA 2810055G20 gene        | A1823999    | 16 | 5.696  | 5.97   | 6.443  | 6.924  | 6.324  | 7.031  | 5.109  | 6.79   | 6.238  | 7.154  | 5.989  | 6.688  | 5.466  | 5.426  | 5.676  | 6.73   | 6.667  | 6.301  | 5.99    | 6.443   | 6.206     | 0.43264 | 0.44280   | 0.86406 | 0.36347       | 0.93214   | 0.01347 | 0.64220   | 0.68857        | 0.00012  | -0.37127 |
| 2810043A07RIK | RIKEN cDNA 2810043A07 gene        | A1836316    | 3  | 5.79   | 6.684  | 4.907  | 5.935  | 3.322  | 5.352  | 6.389  | 5.999  | 5.883  | 5.556  | 6.761  | 6.17   | 8.299  | 6.051  | 5.662  | 7.741  | 5.961  |        | 4.998   | 0.10247 | 0.41050   | 0.52534 | 0.29526   | 0.54018 | 0.01368       | 0.60749   | 0.43453 | 0.06866   | -0.76800       |          |          |
| 2810045J04RIK | RIKEN cDNA 2810045J04 gene        | BQ560445    | 17 | 4.704  | 5.424  | 4.858  | 6.106  | 7.152  |        | 7.782  | 5.999  | 7.124  | 4.876  | 6.675  | 6.392  | 6.038  | 5.414  | 5.417  | 5.21   | 5.719  | 6.327  | 3.666   | 6.332   | 0.53055   | 0.46189 | 0.49495   | 0.28969 | 0.33293       | 0.01566   | 0.98537 | 0.76574   | 0.06422        | -0.74093 |          |
| 2810045K02RIK | RIKEN cDNA 2810045K02 gene        | A1836168    | 4  | 10.885 | 10.545 | 10.427 | 10.662 | 10.244 | 10.627 | 10.566 | 10.446 | 10.253 | 10.707 | 10.584 | 10.539 | 11.023 | 10.346 | 10.461 | 10.351 | 10.744 | 10.733 | 10.544  | 10.805  | 0.73343   | 0.50524 | 0.34433   | 0.25973 | 0.91681       | 0.01342   | 0.36776 | 0.58840   | 0.21953        | 1.50088  |          |
| 2810047C02RIK | RIKEN cDNA 2810047C02 gene        | BQ559902    | 3  | 4.249  | 5.625  | 5.781  | 5.449  | 6.151  | 6.532  | 5.129  | 5.818  | 5.546  | 5.907  | 6.293  | 5.596  | 5.307  | 6.293  | 5.581  | 5.978  | 4.755  | 5.346  | 6.372   | 5.725   | 0.44333   | 0.44331 | 0.34703   | 0.29985 | 0.45495       | 0.01419   | 0.38481 | 0.37343   | 0.18424        | 1.34419  |          |
| 28100416C2RIK | RIKEN cDNA 28100416C2 gene        | A1851742    | 3  | 7.294  | 5.7    | 5.655  | 5.988  | 6.392  | 7.135  | 8.464  | 6.072  | 7.153  | 5.7    | 7.455  | 5.853  | 4.66   | 6.011  | 7.624  | 8.122  | 11.028 | 6.907  | 5.654   | 5.803   | 0.44894   | 0.45385 | 0.25473   | 0.30136 | 0.08323       | 0.06041   | 0.77218 | 0.72196   | 0.02350        | -0.42909 |          |
| 28100417H1RIK | RIKEN cDNA 28100417H1 gene        | BG063267    | 9  | 6.258  | 5.844  | 6.844  | 6.933  | 6.966  | 5.297  | 5.126  | 5.795  | 6.773  | 7.335  | 6.09   | 6.539  | 7.371  | 6.968  | 6.672  | 5.842  | 6.93   | 7.305  | 6.837   | 6.484   | 0.74591   | 0.50801 | 0.30181   | 0.25093 | 0.20750       | 0.02016   | 0.49217 | 0.63901   | 0.01204        | 0.31219  |          |
| 2810042Z02RIK | RIKEN cDNA 2810042Z02 gene        | BG066246    | 1  | 6.746  | 7.248  | 6.527  | 6.804  | 5.989  | 7.734  | 7.361  | 7.372  | 5.057  | 6.042  | 9.966  | 6.237  | 6.766  | 7.428  | 7.12   | 6.816  | 6.181  | 7.156  | 6.285   | 7.12    | 0.58795   | 0.47368 | 0.99773   | 0.30265 | 0.92854       | 0.01346   | 0.78895 | 0.72580   | 0.00890        | 0.08859  |          |
| 2810042G06RIK | RIKEN cDNA 2810042G06 gene        | A1423935    | 7  | 9.865  | 8.456  | 9.904  | 8.771  | 8.877  | 8.782  | 8.551  | 8.722  | 8.859  | 8.563  | 9.088  | 8.528  | 9.144  | 8.088  | 8.797  | 9.124  | 8.964  | 8.152  | 8.861   | 0.29622 | 0.41937   | 0.64946 | 0.32008   | 0.19923 | 0.02077       | 0.24537   | 0.53141 | 0.02805   | 0.48053        |          |          |
| 2810042B15RIK | RIKEN cDNA 2810042B15 gene        | AA125903    | 8  | 7.965  | 8.245  | 8.427  | 7.895  | 11.252 | 8.34   | 8.551  | 8.705  | 8.47   | 8.2    | 7.966  | 7.059  | 7.317  | 7.897  | 8.527  | 8.776  | 8.866  | 7.778  | 8.388   | 0.15705 | 0.40769   | 0.51675 | 0.29974   | 0.50064 | 0.01386       | 0.28202   | 0.54901 | 0.00175   | 1.11844        |          |          |
| 2810042H04RIK | RIKEN cDNA 2810042H04 gene        | BQ557506    | 13 | 5.059  | 5.84   | 3.636  | 6.939  | 5.735  |        | 8.983  | 5.089  | 4.954  | 4.022  | 6.524  | 4.916  | 4.755  | 4.237  | 4.07   | 5.777  | 5.438  | 5.646  | 5.755   | 0.83773 | 0.52834   | 0.74765 | 0.33965   | 0.75562 | 0.01325       | 0.70171   | 0.70485 | 0.30442   | 1.87113        |          |          |
| 2810042D09RIK | RIKEN cDNA 2810042D09 gene        | A1843608    | 4  | 8.142  | 8.009  | 6.95   | 7.994  | 8.422  | 8.345  | 8.291  | 8.154  | 8.78   | 8.376  | 4.529  | 8.012  | 8.784  | 8.552  | 8.306  | 7.301  | 8.185  | 8.429  | 8.426   | 8.196   | 0.75506   | 0.51003 | 0.26165   | 0.24252 | 0.11133       | 0.03968   | 0.52210 | 0.64995   | 0.44185        | -2.51657 |          |
| 2810043J12RIK |                                   |             |    |        |        |        |        |        |        |        |        |        |        |        |        |        |        |        |        |        |        |         |         |           |         |           |         |               |           |         |           |                |          |          |

| Gene Symbol   | Name                       | Accession # | Ch | P30   | P30_C2 | P30_C3 | P30_C4 | P30_C5 | P70_C1 | P70_C2 | P70_C3 | P70_C4 | P70_C5 | P30_E1 | P30_E2 | P30_E3 | P30_E4 | P70_E4 | P70_E5 | P30_CvE p | P30_FDR  | P70_CvE p | P70_FDR | P30_CvP70C p | Age FDR | CvE p   | CvE FDR | r <sup>2</sup> | t       |         |         |         |         |
|---------------|----------------------------|-------------|----|-------|--------|--------|--------|--------|--------|--------|--------|--------|--------|--------|--------|--------|--------|--------|--------|-----------|----------|-----------|---------|--------------|---------|---------|---------|----------------|---------|---------|---------|---------|---------|
| 4631426J05R1K | RIKEN cDNA 4631426J05 gene | BC055989    | 7  | 9.591 | 10.108 | 8.184  | 9.231  | 8.377  | 8.645  | 9.09   | 9.206  | 8.602  | 9.409  | 8.667  | 8.819  | 8.381  | 7.958  | 9.055  | 8.538  | 9.107     | 8.223    | 8.596     | 8.515   | 0.23795      | 0.41230 | 0.06005 | 0.19593 | 0.86570        | 0.01331 | 0.03896 | 0.41506 | 0.27675 | 1.74961 |
| 4632404H2R1K  | RIKEN cDNA 4632404H22 gene | BC069932    | X  | 7.292 | 6.049  | 6.907  | 6.673  | 6.618  | 4.984  | 9.225  | 4.903  | 4.816  | 6.199  | 8.998  | 10.228 | 6.101  | 6.951  | 6.5    | 8.738  | 5.887     | 5.259    | 7.321     | 6.552   | 0.63265      | 0.48319 | 0.82781 | 0.35993 | 0.66441        | 0.01334 | 0.06197 | 0.68111 | 0.02448 | 0.44804 |
| 4632411B12R1K | RIKEN cDNA 4632411B12 gene | A431067     | 1  | 7.443 | 6.689  | 6.489  | 5.367  | 6.932  | 6.459  | 6.824  | 6.991  | 7.394  | 7.144  | 6.218  | 6.555  | 7.275  | 6.844  | 7.748  | 6.899  | 5.616     | 7.6      | 7.268     | 0.58658 | 0.47340      | 0.33351 | 0.25751 | 0.38768 | 0.04881        | 0.03129 | 0.56342 | 0.04070 | 0.06512 |         |
| 4632417H17R1K | RIKEN cDNA 4632417H18 gene | AB032088    | 19 | 5.833 | 5.018  | 5.276  | 5.585  | 3.957  | 7.155  | 5.64   | 3.558  | 6.985  | 6.288  | 6.575  | 5.523  | 6.575  | 6.784  | 5.833  | 4.859  | 5.421     | 9.338    | 0.513268  | 0.47340 | 0.33351      | 0.25751 | 0.38768 | 0.04881 | 0.03129        | 0.56342 | 0.04070 | 0.06512 |         |         |
| 4632419K20R1K | RIKEN cDNA 4632419K22 gene | BC055989    | 8  | 5.833 | 5.018  | 5.276  | 5.585  | 3.957  | 7.155  | 5.64   | 3.558  | 6.985  | 6.288  | 6.575  | 5.523  | 6.575  | 6.784  | 5.833  | 4.859  | 5.421     | 9.338    | 0.513268  | 0.47340 | 0.33351      | 0.25751 | 0.38768 | 0.04881 | 0.03129        | 0.56342 | 0.04070 | 0.06512 |         |         |
| 4632419K20R1K | RIKEN cDNA 4632419K22 gene | BC055989    | 14 | 4.175 | 2.65   | 3.699  | 4.033  | 4.708  | 6.781  | 5.878  | 4.583  | 5.029  | 5.833  | 5.523  | 6.575  | 6.784  | 5.833  | 4.859  | 5.421  | 9.338     | 0.513268 | 0.47340   | 0.33351 | 0.25751      | 0.38768 | 0.04881 | 0.03129 | 0.56342        | 0.04070 | 0.06512 |         |         |         |
| 4632419K20R1K | RIKEN cDNA 4632419K20 gene | AB01280     | 7  | 6.605 | 7.654  | 8.117  | 7.769  | 6.927  | 6.25   | 7.001  | 6.853  | 7.222  | 7.636  | 7.199  | 7.255  | 9.098  | 8.137  | 7.29   | 7.687  | 7.891     | 7.101    | 7.406     | 7.675   | 0.44628      | 0.44472 | 0.3711  | 0.27042 | 0.26179        | 0.05732 | 0.12812 | 0.54858 | 0.17930 | 1.32083 |
| 4632427E13R1K | RIKEN cDNA 4632427E13 gene | BC070284    | 7  | 8.322 | 7.757  | 7.382  | 7.868  | 7.046  | 7.819  | 7.278  | 6.637  | 6.781  | 7.551  | 6.899  | 7.866  | 6.535  | 8.015  | 7.411  | 7.248  | 7.766     | 6.87     | 7.693     | 7.455   | 0.31348      | 0.42194 | 0.50475 | 0.29160 | 0.17724        | 0.02287 | 0.67978 | 0.69907 | 0.08440 | 0.85875 |
| 4632428N05R1K | RIKEN cDNA 4632428N05 gene | AB040173    | 10 | 8.634 | 8.374  | 8.155  | 8.357  | 7.547  | 7.568  | 8.136  | 8.239  | 6.835  | 7.007  | 7.756  | 8.131  | 7.606  | 7.478  | 7.195  | 7.443  | 7.692     | 7.408    | 8.15      | 0.92826 | 0.41171      | 0.59219 | 0.30868 | 0.06101 | 0.09654        | 0.06807 | 0.67839 | 0.15756 | 1.30613 |         |
| 4732418C07R1K | RIKEN cDNA 4732418C07 gene | BC063132    | 4  | 7.741 | 6.475  | 7.083  | 7.584  | 6.214  | 5.753  | 7.04   | 6.151  | 7.123  | 3.555  | 7.004  | 6.648  | 5.555  | 6.896  | 6.627  | 7.062  | 7.356     | 7.958    | 6.457     | 0.17569 | 0.48002      | 0.21714 | 0.32384 | 0.30065 | 0.01637        | 0.55703 | 0.66205 | 0.05639 | 0.69141 |         |
| 4732446K03R1K | RIKEN cDNA 4732446K03 gene | AA48302     | 6  | 7.44  | 7.362  | 7.785  | 6.657  | 7.121  | 12.445 | 6.087  |        |        |        |        |        |        |        |        |        |           |          |           |         |              |         |         |         |                |         |         |         |         |         |

| Gene Symbol   | Name                         | Accession # | Ch | P30_C1 | P30_C2 | P30_C3 | P30_C4 | P30_C5 | P70_C1 | P70_C2 | P70_C3 | P70_C4 | P30_E1 | P30_E2 | P30_E3 | P30_E4  | P30_E5 | P70_E1 | P70_E2 | P70_E3 | P70_E4 | P70_E5  | P30 Cve p | P30 FDR | P70 Cve p | P70 FDR | P30C v P70 | Age FDR | Cve p   | Cve FDR | r <sup>2</sup> | t        |          |
|---------------|------------------------------|-------------|----|--------|--------|--------|--------|--------|--------|--------|--------|--------|--------|--------|--------|---------|--------|--------|--------|--------|--------|---------|-----------|---------|-----------|---------|------------|---------|---------|---------|----------------|----------|----------|
| 4933400A1J1RK | RIKEN cDNA 4933400A11 gene   | BQ559255    | X  | 6.411  | 6.248  | 3.168  | 6.48   | 4.962  | 5.712  | 4.072  | 5.151  | 4.496  | 5.411  | 6.482  | 5.939  | 4.368   | 5.209  | 5.297  | 4.185  | 5.807  | 8.669  | 4.858   | 0.99448   | 0.56412 | 0.36070   | 0.26307 | 0.50926    | 0.01381 | 0.44684 | 0.62155 | 0.06127        | 0.72262  |          |
| 4933400E14RK  | RIKEN cDNA 4933400E14 gene   | BG068043    | 7  | 7.133  | 6.809  | 6.748  | 5.119  | 5.672  | 9.863  | 7.774  | 6.835  | 7.532  | 5.65   | 6.911  | 7.175  | 6.513   | 4.892  | 7.033  | 6.763  | 6.629  | 6.02   | 6.9     | 0.97848   | 0.56030 | 0.38669   | 0.26833 | 0.24634    | 0.01812 | 0.53121 | 0.65317 | 0.08234        | -0.84723 |          |
| 4933403F05RK  | RIKEN cDNA 4933403F05 gene   | BG067184    | 18 | 4.018  | 4.049  | 5.415  | 5.113  | 6.071  | 7.524  | 5.796  | 6.976  | 7      | 4.585  | 5.555  | 3.126  | 4.92    | 4      | 4.794  | 4.816  | 4.017  | 6.793  | 3.644   | 5.17      | 0.45072 | 0.44622   | 0.08679 | 0.20279    | 0.06322 | 0.09164 | 0.07517 | 0.43937        | 0.04480  | 0.61251  |
| 4933403G14RK  | RIKEN cDNA 4933403G14 gene   | A1835009    | 8  | 9.512  | 9.975  | 9.472  | 9.408  | 8.815  | 9.19   | 8.468  | 8.997  | 8.914  | 8.622  | 9.221  | 9.075  | 9.535   | 9.127  | 9.49   | 8.62   | 8.964  | 8.817  | 8.746   | 0.49948   | 0.45571 | 0.75778   | 0.34168 | 0.02946    | 0.25183 | 0.70323 | 0.70524 | 0.00057        | 0.06780  |          |
| 4933406C10RK  | RIKEN cDNA 4933406C10 gene   | BG067224    | 12 | 4.454  | 6.676  | 4.263  | 5.35   | 6.492  | 6.17   | 5.208  | 4.562  | 4.524  | 4.027  | 6.366  | 4.954  | 6.734   | 6.111  | 5.793  | 5.472  | 6.018  | 6.016  | 4.649   | 0.45843   | 0.44770 | 0.14517   | 0.21664 | 0.40298    | 0.01463 | 0.11959 | 0.46548 | 0.27583        | 1.74561  |          |
| 4933406E20RK  | RIKEN cDNA 4933406E20 gene   | A1853847    | 9  | 8.654  | 8.859  | 8.977  | 8.915  | 10.028 | 9.783  | 8.843  | 8.698  | 8.042  | 9.588  | 8.82   | 9.092  | 8.926   | 8.935  | 9.116  | 8.852  | 8.677  | 8.99   | 8.746   | 8.771     | 0.72611 | 0.50362   | 0.62177 | 0.31458    | 0.77762 | 0.01324 | 0.52162 | 0.64978        | 0.10124  | 0.31482  |
| 4933407C03RK  | RIKEN cDNA 4933407C03 gene   | A1851769    | 8  | 8.42   | 8.674  | 9.094  | 8.215  | 8.445  | 7.76   | 8.226  | 7.928  | 8.942  | 9.085  | 8.859  | 8.361  | 8.294   | 8.428  | 5.568  | 4.844  | 8.883  | 8.958  | 8.642   | 0.70761   | 0.49952 | 0.10533   | 0.20732 | 0.53453    | 0.01355 | 0.10610 | 0.50127 | 0.19051        | -1.37212 |          |
| 4933407H18RK  | RIKEN cDNA 4933407H18 gene   | BQ562002    | 5  | 4.543  | 5.644  | 5.54   | 6.774  | 6.754  | 6.617  | 5.524  | 5.238  | 4.617  | 6.559  | 5.178  | 6.146  | 5.705   | 6.699  | 5.003  | 6.845  | 4.783  | 5.791  | 5.231   | 5.771     | 0.84607 | 0.53020   | 0.32620 | 0.25600    | 0.26073 | 0.01757 | 0.47187 | 0.63132        | 0.01468  | 0.34522  |
| 4933407N01RK  | RIKEN cDNA 4933407N01 gene   | BG075550    | 11 | 8.336  | 8.731  | 8.899  | 8.971  | 8.5    | 8.632  | 9.341  | 9.06   | 9.086  | 8.328  | 8.646  | 9.243  | 9.081   |        | 8.895  | 8.814  | 8.542  | 8.82   | 9.345   | 9.007     | 0.18247 | 0.40827   | 0.92882 | 0.37724    | 0.26678 | 0.01481 | 0.43137 | 0.61534        | 0.02405  | 0.44397  |
| 4933411G11RK  | RIKEN cDNA 4933411G11RK gene | BG070786    | 5  | 5.843  | 7.024  | 6.087  | 5.181  | 4.229  | 8.257  | 8      | 6.919  | 6.001  | 7.409  | 4.593  | 3.766  | 4.322   | 6.225  | 6.829  | 5.722  | 5.85   | 9.033  | 5.396   | 4.455     | 0.50293 | 0.45639   | 0.50456 | 0.29156    | 0.02848 | 0.26078 | 0.37747 | 0.59265        | 0.08877  | -0.88281 |
| 4933411K16RK  | RIKEN cDNA 4933411K16 gene   | AA149758    | 19 | 7.272  | 5.482  | 5.814  | 5.682  | 6.053  | 7.289  | 4.173  | 6.449  | 5.728  | 5.763  | 5.89   | 6.229  | 7.227   | 6.233  | 5.82   | 5.992  | 6.339  | 7.99   | 6.195   | 0.90961   | 0.54445 | 0.43585   | 0.27813 | 0.65718    | 0.01335 | 0.44133 | 0.61927 | 0.01507        | 0.34984  |          |
| 4933411K20RK  | RIKEN cDNA 4933411K20 gene   | A183858     | 8  | 7.056  | 6.385  | 6.359  | 7.637  | 9.791  | 7.027  | 7.699  | 7.094  | 6.555  | 7.204  | 6.371  | 7.008  | 6.868   | 6.545  | 6.848  | 7.425  | 6.423  | 6.845  | 7.292   | 6.467     | 0.65358 | 0.48769   | 0.36953 | 0.26486    | 0.66835 | 0.01333 | 0.43408 | 0.61644        | 0.06543  | 0.20893  |
| 4933417Z00RK  | RIKEN cDNA 4933417Z00 gene   | A1839934    | 19 | 8.517  | 9.173  | 8.922  |        | 8.569  | 9.201  | 8.937  | 9.355  | 8.954  | 8.898  | 9.189  | 6.64   | 9.382   | 8.786  | 5.897  | 8.409  | 8.831  | 8.527  | 8.967   | 8.866     | 0.02267 | 0.43490   | 0.05406 | 0.19435    | 0.05833 | 0.10313 | 0.33587 | 0.57408        | 0.06355  | 0.73680  |
| 4933421E11RK  | RIKEN cDNA 4933421E11 gene   | BG063487    | 3  | 6.925  | 6.921  | 6.67   | 6.429  | 7.136  | 7.826  | 7.346  | 7.451  | 6.926  | 7.531  | 7.261  | 7.479  | 7.209   | 7.632  | 7.574  | 6.779  | 7.272  | 7.451  | 7.664   | 7.521     | 0.02604 | 0.43283   | 0.65933 | 0.32204    | 0.06210 | 0.09404 | 0.27696 | 0.54661        | 0.03531  | 0.54113  |
| 4933424B01RK  | RIKEN cDNA 4933424B01 gene   | AA52182     | 6  | 7.095  | 6.32   | 5.617  | 6.692  | 5.987  | 6.584  | 7.659  | 6.149  | 5.69   | 5.04   | 6.171  | 5.672  | 5.072   | 6.477  | 7.17   | 4.787  | 6.905  | 6.309  | 5.209   | 0.25527   | 0.41414 | 0.82289   | 0.35495 | 0.82348    | 0.01326 | 0.41230 | 0.60751 | 0.11700        | -1.02956 |          |
| 4933425L03RK  | RIKEN cDNA 4933425L03 gene   | BG076093    | 12 | 8.06   | 7.921  | 8.335  | 7.751  | 7.786  | 7.732  | 6.59   | 7.953  | 7.375  | 7.805  | 6.934  | 8.386  | 6.861   | 7.687  | 7.994  | 7.552  | 7.437  | 7.881  | 7.825   | 8.028     | 0.11930 | 0.40895   | 0.37108 | 0.26518    | 0.05232 | 0.12078 | 0.47480 | 0.63244        | 0.01532  | 0.35276  |
| 4933426K21RK  | RIKEN cDNA 4933426K21 gene   | A1847766    | 6  | 3.896  | 5.081  | 4.163  | 4.825  | 5.21   | 5.952  | 8.044  | 4.828  | 6.119  | 6.044  | 7.669  | 4.998  | 3.974   | 6.599  | 5.019  | 3      | 6.571  | 5.265  | 3.874   | 4.322     | 0.13656 | 0.40804   | 0.08258 | 0.20174    | 0.01627 | 0.40239 | 0.70175 | 0.70486        | 0.06541  | -0.74826 |
| 4933426M11RK  | RIKEN cDNA 4933426M11 gene   | BG075203    | 12 | 5.114  | 5.125  | 6.248  | 9.224  | 4.813  | 3.907  | 3.202  | 4.998  | 4.658  | 3.576  | 5.436  | 4.339  | 3.902   | 5.746  | 5.202  | 5.161  | 4.913  | 5.687  | 5.486   | 5.209     | 0.20251 | 0.41072   | 0.01020 | 0.18013    | 0.04995 | 0.12917 | 0.98971 | 0.76652        | 0.09676  | 0.92576  |
| 4933427D06RK  | RIKEN cDNA 4933427D06 gene   | CK345551    | 6  | 11.476 | 11.571 | 11.401 | 11.944 | 11.616 | 11.727 | 11.864 | 11.531 | 11.711 | 11.258 | 11.113 | 11.727 | 11.1465 | 11.913 | 11.618 | 11.295 | 11.685 | 12.435 | 11.596  | 0.78902   | 0.51756 | 0.91283   | 0.37380 | 0.29467    | 0.01826 | 0.93467 | 0.75625 | 0.02846        | 0.48413  |          |
| 4933427D14RK  | RIKEN cDNA 4933427D14 gene   | BG075087    | 11 | 6.244  | 6.087  | 5.975  | 4.986  | 5.953  | 11.579 | 4.96   | 5.139  | 5.764  | 5.788  | 6.149  | 5.659  | 6.865   | 5.486  | 6.949  | 4.45   | 5.899  | 0      | 5.57    | 4.97      | 0.34770 | 0.42747   | 0.17154 | 0.22262    | 0.54588 | 0.01365 | 0.24643 | 0.53193        | 0.00054  | -0.06577 |
| 4933428G09RK  | RIKEN cDNA 4933428G09 gene   | AA150180    | 5  | 7.598  | 7.026  | 7.643  | 6.419  | 6.7    | 6.917  | 6.802  | 5.57   | 6.407  | 7.116  | 7.069  | 6.998  | 7.999   | 6.883  | 7.085  | 6.905  | 7.202  | 8.057  | 7.014   | 6.642     | 0.36997 | 0.43173   | 0.46686 | 0.28420    | 0.70071 | 0.01328 | 0.23480 | 0.52619        | 0.15391  | -1.20636 |
| 4933428G20RK  | RIKEN cDNA 4933428G20 gene   | A1837434    | 11 | 8.705  | 9.052  | 8.879  | 9.379  | 8.711  | 8.846  | 9.883  | 9.957  | 8.654  | 9.64   | 8.749  | 8.263  | 9.11    | 8.876  | 9.134  | 9.138  | 9.042  | 8.994  | 9.107   | 8.972     | 0.57299 | 0.47056   | 0.52781 | 0.29609    | 0.35952 | 0.01520 | 0.39397 | 0.59978        | 0.00363  | -0.17069 |
| 4933431E20RK  | RIKEN cDNA 4933431E20 gene   | A1851293    | 3  | 6.412  | 5.564  | 6.214  | 6.868  | 7.245  | 8.778  | 7.055  | 6.968  | 6.198  | 9.245  | 7.083  | 8.117  | 6.305   | 5.866  | 5.859  | 6.363  | 6.686  | 7.14   | 7.048   | 0.50369   | 0.45654 | 0.52781   | 0.29609 | 0.35952    | 0.01520 | 0.39397 | 0.59978 | 0.00363        | -0.17069 |          |
| 4933433C11RK  | RIKEN cDNA 4933433C11 gene   | BQ559325    | 2  | 6.674  | 5.945  | 5.814  | 8.55   | 7.965  | 6.427  | 6.158  | 6.269  | 5.582  | 7.953  | 5.796  | 5.733  | 5.411   | 6.18   | 7.15   | 7.461  | 4.162  | 5.793  | 5.795   | 6.448     | 0.43698 | 0.44362   | 0.62305 | 0.31484    | 0.76435 | 0.01324 | 0.34905 | 0.58005        | 0.04584  | 0.61992  |
| 4933433F14RK  | RIKEN cDNA 4933433F14 gene   | A1849430    | 12 | 7.558  | 7.967  | 8.427  | 8.483  | 7.592  | 9.249  | 8.344  | 8.643  | 8.529  | 9.047  | 8.614  | 8.892  | 9.192   | 8.788  | 8.423  | 9.299  | 9.116  | 8.81   | 9.359   | 8.771     | 0.14054 | 0.40791   | 0.68050 | 0.32626    | 0.05169 | 0.12290 | 0.23654 | 0.52705        | 0.06117  | -0.72200 |
| 4933434E20RK  | RIKEN cDNA 4933434E20 gene   | A1843511    | 3  | 7.523  | 7.863  | 7.53   | 8.011  | 7.438  | 7.866  | 7.721  | 6.647  | 7.48   | 7.279  | 8.172  | 8.14   | 7.639   | 8.02   | 7.16   | 7.849  | 7.761  | 8.378  | 7.848   | 8.065     | 0.50910 | 0.45761   | 0.01793 | 0.18312    | 0.31129 | 0.01669 | 0.03150 | 0.40946        | 0.0021   | 0.13322  |
| 4933434F05RK  | RIKEN cDNA 4933434F05 gene   | BG070514    | 4  | 7.48   | 7.836  | 2.973  | 6.981  | 7.01   | 6.286  | 7.289  | 6.603  | 7.169  | 7.125  | 7.039  | 6.823  | 7.349   | 7.966  | 6.938  | 5.57   | 7.06   | 7.239  | 6.714   | 0.44128   | 0.44443 | 0.98231   | 0.38908 | 0.64133    | 0.01338 | 0.41289 | 0.60775 | 0.23698        | -1.57627 |          |
| 4933437F05RK  | RIKEN cDNA 4933437F05 gene   | BG076717    | 12 | 8.934  | 8.804  | 9.656  | 8.824  | 9.027  | 7.555  | 8.232  | 9.236  | 9.966  | 8.892  | 8.938  | 8.738  | 9.155   | 8.732  | 9.031  | 8.612  | 8.624  | 8.317  | 9.39331 | 0.43552   | 0.89768 | 0.37056   | 0.23829 | 0.01846    | 0.5248  | 0.65080 | 0.00250 | 0.14161        |          |          |
| 4933439C20RK  | RIKEN cDNA 4933439C20 gene   | BG063632    | 11 | 6.749  | 7.228  | 6.506  | 8.34   | 7.774  | 6.972  | 6.528  | 7.309  | 6.324  | 5.658  | 6.503  | 7.051  | 6.573   | 5.833  | 5.559  | 6.481  | 6.396  | 7.837  | 6.34    | 7.022     | 0.25626 | 0.41426   | 0.35699 | 0.29788    | 0.49825 | 0.01387 | 0.58309 | 0.67060        | 0.17634  | -1.30873 |
| 4933439F18RK  | RIKEN cDNA 4933439F18 gene   | A1842014    | 11 | 7.806  | 8.331  | 8.273  | 8.877  | 9.988  | 7.758  | 7.941  | 8.339  | 8.58   | 8.172  | 8.038  | 8.252  | 7.993   | 7.848  | 7.809  | 7.595  | 8.012  | 5.229  | 6.229   | 7.97      | 0.21593 | 0.41034   | 0.08512 | 0.20237    | 0.29779 | 0.01330 | 0.54907 | 0.94212        | 0.23150  | -1.55236 |
| 5031414D18RK  | RIKEN cDNA 5031414D18 gene   | BG067457    | 14 | 6.199  | 6.521  | 7.05   | 8.36   | 7.699  | 5.465  | 7.011  | 7.143  | 6.175  | 5.858  | 5.886  | 5.414  | 6.959   | 5.965  | 7.274  | 5.895  | 7.624  | 7.132  | 7.022   | 5.378     | 0.67311 | 0.49193   | 0.61192 | 0.31264    | 0.13978 | 0.02938 | 0.91735 | 0.75288        | 0.02117  | -0.41591 |
| 5031439G07RK  | RIKEN cDNA 5031439G07 gene   | BG087497    | 15 | 8.71   | 8.973  | 8.873  | 8.598  | 8.743  | 9.001  | 9.19   | 9.77   | 8.837  | 8.766  | 8.466  | 9.964  | 9.207   | 9.083  | 9.655  | 9.911  | 7.756  | 9.083  | 9.51023 | 0.45783   | 0.74740 | 0.33906   | 0.23771 | 0.01702    | 0.96824 | 0.76259 | 0.02887 | -0.48767       |          |          |
| 503144D02RK   | RIKEN cDNA 503144D02 gene    | BQ555349    | 19 | 5.8    | 5.8    | 2.152  | 3.791  | 2.881  | 8.90   |        |        |        |        |        |        |         |        |        |        |        |        |         |           |         |           |         |            |         |         |         |                |          |          |

| Gene Symbol   | Name                        | Accession # | Ch | P30_C1 | P30_C2 | P30_C3 | P30_C4 | P30_C5 | P30_C6 | P70_C1 | P70_C2 | P70_C3 | P70_C4 | P70_C5 | P30_E1 | P30_E2 | P30_E3 | P30_E4 | P30_E5 | P70_E1 | P70_E2 | P70_E3 | P70_E4 | P70_E5  | P30_CvE p | P30_FDR | P70_CvE p | P70_FDR | P30C v P70C p | Age FDR   | CvE p   | CvE FDR | r <sup>2</sup> | t       |
|---------------|-----------------------------|-------------|----|--------|--------|--------|--------|--------|--------|--------|--------|--------|--------|--------|--------|--------|--------|--------|--------|--------|--------|--------|--------|---------|-----------|---------|-----------|---------|---------------|-----------|---------|---------|----------------|---------|
| G030458C1J1RK | RIKEN cDNA 6030458C1J1 gene | CK352213    | 15 | 6.446  | 5.436  | 4.481  | 5.938  | 4.219  | 5.215  | 5.492  | 6.459  | 5.257  | 7.907  | 6.184  | 5.322  | 5.095  | 4.907  | 6.925  | 5.907  | 5.218  | 6.357  | 6.74   | 6.619  | 0.51947 | 0.45967   | 0.86511 | 0.36369   | 0.28460 | 0.01680       | 0.56352   | 0.66422 | 0.01809 | 0.38933        |         |
| G030490I01RK  | RIKEN cDNA 6030490I01 gene  | A1431693    | 17 | 7.979  | 7.526  | 7.327  | 6.86   | 7.97   | 7.227  | 7.325  | 6.462  | 7.234  | 7.02   | 8.163  | 8.093  | 8.635  | 7.817  | 7.819  | 6.881  | 7.357  | 8.279  | 7.18   | 7.843  | 0.05733 | 0.41925   | 0.15960 | 0.21993   | 0.10502 | 0.04308       | 0.03411   | 0.41144 | 0.03963 | 0.57453        |         |
| G230409E13RK  | RIKEN cDNA 60230409E13 gene | A1837880    | 4  | 7.795  | 7.888  | 8.223  | 7.813  | 7.208  | 6.263  | 7.848  | 7.626  | 7.008  | 7.545  | 8.178  | 8.16   | 8.718  | 7.375  | 8.405  | 6.081  | 7.071  | 7.619  | 7.775  | 7.641  | 7.28    | 0.13807   | 0.40798 | 0.50343   | 0.29134 | 0.14676       | 0.02774   | 0.03404 | 0.50176 | 0.50072        | 2.83248 |
| G230416J20RK  | RIKEN cDNA 6230416J20 gene  | BG065710    | 4  | 6.628  | 7.401  | 7.154  | 8.579  | 4.858  | 6.28   | 5.883  | 6.157  | 5.729  | 5.874  | 6.729  | 5.629  | 5.743  | 4.959  | 6.281  | 7.124  | 5.44   | 5.981  | 8.842  | 5.401  | 0.15789 | 0.40769   | 0.40971 | 0.27294   | 0.16555 | 0.02440       | 0.62483   | 0.68347 | 0.00031 | 0.04959        |         |
| G330403A02RK  | RIKEN cDNA 6330403A02 gene  | A1834764    | 1  | 5.36   | 6.831  | 5.48   |        | 4.892  | 6.31   | 7.602  | 7.346  | 7.913  | 4.635  | 6.686  | 6.209  | 6.576  | 6.344  | 5.392  | 0.099  | 6.104  | 6.619  | 6.563  | 6.244  | 0.22205 | 0.41085   | 0.27451 | 0.24522   | 0.18810 | 0.02173       | 0.46260   | 0.62775 | 0.05630 | 0.69086        |         |
| G330403K07RK  | RIKEN cDNA 6330403K07 gene  | A1850799    | 11 | 10.823 | 10.76  | 10.853 | 10.288 | 10.667 | 11.029 | 10.956 | 10.975 | 10.989 | 11.008 | 11.112 | 10.903 | 10.86  | 10.597 | 10.922 | 11.135 | 10.936 | 11.014 | 11.168 | 11.152 | 0.16638 | 0.40778   | 0.06560 | 0.19379   | 0.02346 | 0.31390       | 0.10028   | 0.45461 | 0.07049 | 0.77890        |         |
| G330406J15RK  | RIKEN cDNA 6330406J15 gene  | A1844364    | 5  | 6.489  | 7.807  | 6.186  | 6.144  | 6.129  | 6.288  | 6.972  | 7.174  | 7.159  | 7.488  | 6.802  | 6.165  | 7.363  | 6.48   | 6.722  | 6.138  | 6.325  | 7.44   | 7.284  | 7.356  | 0.50181 | 0.45617   | 0.91280 | 0.37379   | 0.32015 | 0.01592       | 0.7180    | 0.64841 | 0.28139 | 1.76991        |         |
| G330407J23RK  | RIKEN cDNA 6330407J23 gene  | A1854435    | 10 | 8.894  | 8.883  | 9.007  | 8.149  | 8.858  | 8.798  | 8.301  | 8.924  | 8.313  | 8.705  | 8.832  | 8.932  | 8.927  | 9.043  | 8.711  | 8.45   | 8.438  | 9.008  | 8.582  | 8.44   | 0.25292 | 0.46096   | 0.88740 | 0.36838   | 0.24675 | 0.01810       | 0.82166   | 0.73308 | 0.00317 | 0.15961        |         |
| G330409N04RK  | RIKEN cDNA 6330409N04 gene  | BG069482    | 14 | 7.302  | 6.898  | 6.761  | 6.599  | 6.706  | 6.629  | 7.946  | 6.279  | 7.043  | 6.7    | 6.883  | 7.041  | 6.607  | 6.944  | 6.899  | 7.502  | 7.287  | 6.74   | 6.832  | 7.362  | 0.24571 | 0.41310   | 0.50362 | 0.29138   | 0.83574 | 0.01327       | 0.61151   | 0.51455 | 0.16951 | 1.27783        |         |
| G330416G13RK  | RIKEN cDNA 6330416G13 gene  | BQ558874    | 4  | 7.7    | 8.009  | 7.434  | 6.805  | 6.882  | 8.042  | 8.321  | 7.195  | 7.489  | 8.095  | 7.43   | 7.11   | 7.155  | 7.96   | 7.868  | 6.954  | 7.142  | 6.56   | 7.058  | 7.65   | 0.64736 | 0.48635   | 0.02439 | 0.18534   | 0.17735 | 0.02286       | 0.17005   | 0.49280 | 0.00073 | 0.07639        |         |
| G330419J23RK  | RIKEN cDNA 6330419J24 gene  | A1852337    | X  | 5.893  | 7.062  | 6.28   | 6.737  | 6.76   | 7.244  | 7.928  | 0.399  | 6.869  | 7.697  | 6.938  | 6.99   | 6.615  | 5.757  | 6.049  | 6.521  | 6.024  | 6.353  | 6.087  | 5.946  | 0.87223 | 0.53604   | 0.00321 | 0.17670   | 0.03164 | 0.23313       | 0.01515   | 0.39495 | 0.06252 | 0.73044        |         |
| G330439K17RK  | RIKEN cDNA 6330439K17 gene  | A1851840    | 2  | 9.855  | 9.996  | 9.681  | 10.062 | 9.824  |        | 10.725 | 9.626  | 10.21  | 9.538  | 10.245 | 9.985  | 9.441  | 9.61   | 10.104 | 10.829 | 9.875  | 10.116 | 10.210 | 10.381 | 0.96923 | 0.55813   | 0.43156 | 0.27728   | 0.59072 | 0.01351       | 0.46055   | 0.62695 | 0.06184 | 0.76260        |         |
| G330442E10RK  | RIKEN cDNA 6330442E10 gene  | BG075824    | 12 | 6.604  | 7.035  | 7.957  | 7.439  | 8.014  | 8.829  | 7.943  | 7.705  | 7.316  | 6.285  | 6.658  | 7.474  | 6.845  | 7.315  | 7.193  | 6.822  | 6.829  | 6.64   | 6.801  | 7.153  | 0.34110 | 0.42636   | 0.25486 | 0.24107   | 0.68859 | 0.01330       | 0.14304   | 0.46183 | 0.01186 | 0.30586        |         |
| G330500D04RK  | RIKEN cDNA 6330500D04 gene  | BQ562329    | 13 | 5.579  | 8.613  | 6.755  | 3.585  | 4.392  | 1.433  | 7.34   | 5.426  | 4.601  | 4.077  | 5.556  | 5.541  | 4.479  | 5.17   | 5.211  | 7.492  | 5.306  | 4.624  | 5.892  | 4.547  | 0.53218 | 0.46222   | 0.39224 | 0.26944   | 0.38244 | 0.01448       | 0.77834   | 0.72338 | 0.10006 | 0.94312        |         |
| G330503K22RK  | RIKEN cDNA 6330503K22 gene  | A1427129    | 7  | 9.746  | 9.15   | 9.431  | 8.894  | 9.366  | 9.035  | 8.963  | 9.633  | 8.923  | 9.211  | 9.038  | 9.202  | 9.028  | 9.326  | 9.056  | 8.738  | 9.221  | 9.037  | 8.878  |        | 0.25827 | 0.41449   | 0.32204 | 0.25514   | 0.41847 | 0.01447       | 0.14244   | 0.47798 | 0.37997 | 1.21419        |         |
| G330512M04RK  | RIKEN cDNA 6330512M04 gene  | BQ555803    | 7  | 6.551  | 6.838  | 8.629  | 5.348  | 6.03   | 6.124  | 8.14   | 7.306  | 5.374  | 5.6    | 12.669 | 4.969  | 8.781  | 3.558  | 5.409  | 8.404  | 6.49   | 6.79   | 7.147  | 7.306  | 0.64364 | 0.48555   | 0.27993 | 0.24633   | 0.82553 | 0.01327       | 0.36834   | 0.58865 | 0.17929 | 1.32198        |         |
| G330514A18RK  | RIKEN cDNA 6330514A18 gene  | BQ552865    | 10 | 4.905  | 6.309  | 5.916  | 5.636  | 6.086  | 11.414 | 8.369  | 6.912  | 7.105  | 5.98   | 8.267  | 5.249  | 6.323  | 5.964  | 7.196  | 11.554 | 6.707  | 6.719  | 6.977  | 6.386  | 0.24055 | 0.41256   | 0.83771 | 0.35800   | 0.06496 | 0.08795       | 0.77624   | 0.72290 | 0.22700 | 1.53273        |         |
| G330527O06RK  | RIKEN cDNA 6330527O06 gene  | A1836669    | 2  | 9.844  | 9.367  | 9.327  | 10.241 | 9.741  |        | 9.645  | 9.473  | 9.382  | 9.383  | 9.402  | 9.533  | 9.486  | 10.104 | 9.876  | 9.344  | 9.497  | 9.733  | 10.081 | 9.673  | 0.91436 | 0.54553   | 0.07279 | 0.19323   | 0.27659 | 0.01700       | 0.41492   | 0.60860 | 0.02271 | 0.43114        |         |
| G330534C20RK  | RIKEN cDNA 6330534C20 gene  | A1428240    | X  | 6.8    | 7.068  | 6.55   | 6.45   | 5.935  | 8.102  | 5.49   | 6.78   | 3.899  | 9.687  | 7.114  | 7.802  | 5.977  | 6.267  | 6.699  | 6.938  | 6.616  | 7.311  | 6.119  | 6.616  | 0.28297 | 0.41753   | 0.73484 | 0.33709   | 0.47367 | 0.01431       | 0.72983   | 0.71191 | 0.39574 | 2.28894        |         |
| G330560M22RK  | RIKEN cDNA 6330560M22 gene  | A1840448    | 3  | 4.781  | 4.602  | 5.781  | 4.644  | 6.111  | 6.646  | 5.974  | 6.359  | 7.225  | 6.688  | 5.185  | 4.717  | 3.589  | 4.196  | 4.85   | 6.463  | 6.656  | 5.421  | 4.196  | 4.508  | 0.32595 | 0.42590   | 0.01582 | 0.18235   | 0.00055 | 0.67460       | 0.03532   | 0.41234 | 0.04657 | 0.62511        |         |
| G330577E15RK  | RIKEN cDNA 6330577E15 gene  | BG075747    | 19 | 10.153 | 10.241 | 10.275 | 10.058 | 10.27  | 10.389 | 10.243 | 10.214 | 10.15  | 10.21  | 10.064 | 10.323 | 10.788 | 10.786 | 10.545 | 10.584 | 9.955  | 10.197 | 10.142 | 10.25  | 0.07299 | 0.41523   | 0.95417 | 0.38278   | 0.48903 | 0.01392       | 0.46318   | 0.48000 | 0.51055 | 1.28876        |         |
| G330578E17RK  | RIKEN cDNA 6330578E17 gene  | BG075904    | 1  | 7.17   | 9.42   | 7.628  | 6.528  | 7.314  | 7.953  | 8.48   | 7.671  | 7.58   | 7.082  | 8.477  | 8.003  | 8.234  | 6.98   | 9.81   | 8.134  | 7.349  | 7.837  | 6.726  | 8.248  | 0.04244 | 0.42459   | 0.80105 | 0.35047   | 0.06263 | 0.09289       | 0.11068   | 0.46051 | 0.00127 | 0.10099        |         |
| G332401O19RK  | RIKEN cDNA 6332401O19 gene  | A1853493    | 6  | 7.411  | 8.344  | 7.975  | 7.331  | 7.562  | 8.076  | 7.917  | 8.058  | 8.332  | 7.812  | 7.117  | 6.696  | 7.654  | 8.537  | 9.718  | 8.302  | 7.488  | 8.179  | 9.133  | 8.589  | 0.30692 | 0.42094   | 0.50428 | 0.29151   | 0.03683 | 0.19944       | 0.33033   | 0.56696 | 0.38597 | 2.24248        |         |
| G340514L14RK  | RIKEN cDNA 6430514L14 gene  | A1838776    | 9  | 6.584  | 7.179  | 7.466  | 7.105  | 6.885  | 5.864  | 7.807  | 6.445  | 5.894  | 7.53   | 6.288  | 7.591  | 7.481  | 6.947  | 8.034  | 8.016  | 7.667  | 7.349  | 7.375  |        | 0.52112 | 0.46000   | 0.16036 | 0.20755   | 0.47119 | 0.01410       | 0.07184   | 0.43728 | 0.01393 | 0.39660        |         |
| G340514M23RK  | RIKEN cDNA 6430514M23 gene  | A1842757    | 1  | 7.276  | 7.038  | 6.7    | 6.671  | 6.066  | 4.938  | 6.875  | 6.723  | 6.304  | 6.652  | 6.832  | 7.132  | 7.32   | 6.65   | 6.354  | 6.956  | 6.386  | 6.224  | 6.29   | 7.333  | 0.08780 | 0.56251   | 0.22585 | 0.23477   | 0.05458 | 0.07005       | 0.30223   | 0.55854 | 0.07332 | 0.73520        |         |
| G340517E21RK  | RIKEN cDNA 6430517E21 gene  | A1849174    | 1  | 9.182  | 8.284  | 8.79   | 7.418  | 8.1    | 8.555  | 10.686 | 8.408  | 8.354  | 8.399  | 8.6    | 8.24   | 8.58   | 7.845  | 8.574  | 8.626  | 8.25   | 7.542  | 8.428  | 8.471  | 0.30809 | 0.42111   | 0.20142 | 0.22835   | 0.15366 | 0.02654       | 0.52003   | 0.64924 | 0.2873  | 1.79586        |         |
| G340527G18RK  | RIKEN cDNA 6430527G18 gene  | A1837633    | 12 | 9.547  | 9.24   | 9.68   | 8.864  | 9.722  | 10.153 | 8.993  | 9.861  | 10.166 | 9.946  | 10.299 | 9.92   | 9.869  | 10.037 | 10.071 | 10.64  | 9.914  | 9.821  | 9.674  | 10.083 | 0.04734 | 0.42240   | 0.82086 | 0.35453   | 0.02173 | 0.33456       | 0.13591   | 0.47228 | 0.06150 | 0.72403        |         |
| G340548M08RK  | RIKEN cDNA 6430548M08 gene  | BG071527    | 8  | 8.187  | 8.115  | 7.871  | 8.376  | 8.743  | 8.674  | 7.757  | 8.258  | 8.314  | 8.211  | 7.903  | 8.95   | 7.965  | 8.925  | 8.922  | 8.845  | 8.231  | 8.31   | 8.509  |        | 0.04494 | 0.44446   | 0.11410 | 0.21570   | 0.94163 | 0.01350       | 0.89978   | 0.74940 | 0.00042 | 0.05768        |         |
| G340550H21RK  | RIKEN cDNA 6530550H21 gene  | A1842611    | X  | 5.461  | 6.82   | 6.795  | 6.73   | 6.531  | 6.614  | 6.607  | 13.842 | 8.836  | 6.4    | 7.352  | 6.624  | 6.692  | 6.528  | 6.7    | 6.178  | 7.06   | 6.09   | 7.828  | 6.194  | 0.25228 | 0.41381   | 0.29182 | 0.24884   | 0.23701 | 0.01852       | 0.41151   | 0.60703 | 0.00664 | 0.23120        |         |
| G340704M03RK  | RIKEN cDNA 6430704M03 gene  | A1851180    | 4  | 10.15  | 10.961 | 10.221 | 10.262 | 10.24  | 10.747 | 10.628 | 10.131 | 10.407 | 10.49  | 10.336 | 10.644 | 10.396 | 10.821 | 10.539 | 10.415 | 10.487 | 10.488 | 10.29  | 10.338 | 0.32526 | 0.42379   | 0.46365 | 0.28358   | 0.55106 | 0.01363       | 0.65874   | 0.69329 | 0.17574 | 1.30603        |         |
| G340706D22RK  | RIKEN cDNA 6430706D22 gene  | BG068349    | 1  | 7.098  | 6.114  | 8.305  | 3.644  |        | 5.386  | 7.164  | 5.653  | 5.748  | 6.261  | 8.404  | 6.084  | 6.122  | 5.73   | 5.391  | 6.941  | 6.353  | 5.676  | 5.977  | 6.568  | 0.94556 | 0.55264   | 0.35536 | 0.26198   | 0.66279 | 0.01333       | 0.48191   | 0.63515 | 0.19674 | 1.39977        |         |
| G340710C18RK  | RIKEN cDNA 6430710C18 gene  | A1118723    | 2  | 5.651  | 5.981  | 5.659  | 5.805  | 6.02   | 7.807  | 6.989  | 6.066  | 6.758  | 8.129  | 6.228  | 5.736  | 6.489  | 5.833  | 6.226  |        | 6.32   | 6.103  | 6.166  | 6      | 0.11787 | 0.40906   | 0.14353 | 0.21626   | 0.02725 | 0.32860       | 0.05776</ |         |         |                |         |

| Gene Symbol    | Name                                | Accession # | Ch | P30_C1 | P30_C2 | P30_C3 | P30_C4 | P30_C5 | P70_C1 | P70_C2 | P70_C3 | P70_C4 | P70_C5 | P30_E1 | P30_E2 | P30_E3 | P30_E4 | P30_E5 | P70_E1 | P70_E2 | P70_E3 | P70_E4 | P70_E5  | P30_CvE p | P30_FDR | P70_CvE p | P70_FDR | P30C v P70C p | Age FDR | CvE p   | CvE FDR | r <sup>2</sup> | t        |
|----------------|-------------------------------------|-------------|----|--------|--------|--------|--------|--------|--------|--------|--------|--------|--------|--------|--------|--------|--------|--------|--------|--------|--------|--------|---------|-----------|---------|-----------|---------|---------------|---------|---------|---------|----------------|----------|
| 9930012K11R1K  | RIKEN cDNA 9930012K11 gene          | BG076657    | 14 | 5.555  | 7.603  | 6.591  | 5.257  | 6.375  | 10.302 | 5.084  | 6.815  | 5.822  | 6.509  | 8.039  | 6.087  | 6.471  | 6.129  | 6.392  | 8.451  | 7.214  | 9.441  | 7.035  | 8.833   | 0.54495   | 0.46481 | 0.23626   | 0.23706 | 0.59977       | 0.01637 | 0.19057 | 0.50361 | 0.00053        | 0.06506  |
| 9930012D14R1K  | RIKEN cDNA 9930012D14 gene          | AB857848    | 17 | 8.589  | 7.512  | 7.609  | 7.527  | 8.379  | 7.809  | 6.686  | 7.384  | 7.074  | 8.182  | 8.448  | 7.198  | 7.298  | 9.021  | 7.843  | 8.107  | 7.874  | 7.82   | 7.928  | 7.623   | 0.96667   | 0.56224 | 0.24536   | 0.23904 | 0.30048       | 0.01343 | 0.43928 | 0.61853 | 0.07754        | -0.80200 |
| 9930012J03R1K  | RIKEN cDNA 9930012J03 gene          | BG076140    | 19 | 6.781  | 6.478  | 6.585  | 7.029  | 6.826  | 7.481  | 6.948  | 8.347  | 6.872  | 6.3    | 7.383  | 5.919  | 5.322  | 4.064  | 5.691  | 6.426  | 6.384  | 7.079  | 6.988  | 6.914   | 0.05850   | 0.41279 | 0.28087   | 0.24653 | 0.24462       | 0.01818 | 0.05643 | 0.42730 | 0.37868        | -2.20815 |
| a              | hNRPn-associated with lethal yellow | BG069999    | 2  | 7.091  | 7.407  | 7.526  | 7.928  | 7.494  | 7.922  | 8.62   | 7.608  | 7.82   | 8.468  | 7.703  | 8.087  | 7.475  | 4.272  | 7.833  | 7.412  | 7.523  | 7.8    | 7.877  | 8.912   | 0.52318   | 0.46013 | 0.20760   | 0.23605 | 0.03511       | 0.20708 | 0.31240 | 0.56404 | 0.54835        | 3.11659  |
| A03007L17R1K   | RIKEN cDNA A03007L17 gene           | BG074555    | 6  | 6.29   | 5.766  | 6.244  | 5.843  | 6.503  | 4.927  | 3.694  | 5.94   | 6.348  | 5.923  | 5.522  | 6.263  | 6.09   | 6.749  | 4.559  | 6.459  | 6.553  | 6.03   | 6.248  | 5.525   | 0.61550   | 0.47953 | 0.20395   | 0.22991 | 0.12391       | 0.03427 | 0.33896 | 0.57548 | 0.33895        | -0.20253 |
| A03009H04R1K   | RIKEN cDNA A03009H04 gene           | AB840713    | 11 | 10.461 | 10.18  | 10.671 | 10.783 | 10.603 | 10.236 | 10.181 | 10.596 | 10.347 | 10.883 | 10.464 | 10.011 | 10.723 | 10.740 | 10.782 | 10.222 | 10.553 | 10.638 | 10.72  | 0.60829 | 0.47799   | 0.55629 | 0.30167   | 0.28517 | 0.01679       | 0.93275 | 0.75588 | 0.13826 | -1.13294       |          |
| A13001J15R1K   | RIKEN cDNA A13001J15 gene           | BG0560632   | 1  | 6.443  | 6.077  | 6.524  | 8.354  | 7.109  | 4.807  | 6.15   | 6.451  | 5.609  | 4.861  | 6.134  | 6.67   | 4.858  | 5.424  | 6.949  | 4.47   | 5.413  | 6.147  | 6.49   | 5.87    | 0.12399   | 0.40865 | 0.83704   | 0.35786 | 0.03390       | 0.21571 | 0.27579 | 0.54605 | 0.00649        | -0.22852 |
| A13002J15R1K   | RIKEN cDNA A13002J15 gene           | AI450835    | 6  | 4.929  | 4.601  | 3.322  | 3.896  | 4.196  | 8.414  | 12.289 | 5.727  | 5.296  | 4.499  | 6.092  | 6.095  | 4.519  | 4.345  | 4.447  | 4.47   | 5.278  | 4.803  | 4      | 5.167   | 0.04982   | 0.42172 | 0.18801   | 0.22633 | 0.07169       | 0.57576 | 0.51433 | 0.64716 | 0.00148        | -0.08879 |
| A13004Z20R1K   | RIKEN cDNA A13004Z20 gene           | AI464450    | 10 | 8.589  | 8.226  | 7.926  | 8.175  | 7.326  | 7.916  | 7.48   | 8.061  | 7.838  | 7.502  | 8.224  | 8.146  | 9.061  | 8.196  | 7.626  | 7.614  | 7.997  | 8.935  | 7.933  | 0.20331 | 0.40942   | 0.36334 | 0.26361   | 0.39294 | 0.01475       | 0.13448 | 0.47368 | 0.35090 | -0.20796       |          |
| A13009K04R1K   | RIKEN cDNA A13009K04 gene           | AB847209    | 10 | 7.18   | 7.494  | 6.546  | 6.312  | 6.921  | 5.559  | 5.368  | 6.632  | 6.613  | 8.553  | 4.805  | 6.909  | 6.177  | 2.215  | 7.305  | 6.704  | 2.499  | 6.808  | 6.737  | 6.92    | 0.24672   | 0.41320 | 0.57173   | 0.30470 | 0.60418       | 0.03474 | 0.20683 | 0.41209 | 0.27289        | -1.73275 |
| A23005A4004R1K | RIKEN cDNA A23005A40 gene           | BK          |    |        |        |        |        |        |        |        |        |        |        |        |        |        |        |        |        |        |        |        |         |           |         |           |         |               |         |         |         |                |          |

| Gene Symbol | Name                                                    | Accession # | Ch | P30_C1 | P30_C2 | P30_C3 | P30_C4 | P30_C5 | P70_C1 | P70_C2 | P70_C3 | P70_C4 | P70_C5 | P30_E1 | P30_E2 | P30_E3 | P30_E4 | P30_E5 | P70_E1 | P70_E2 | P70_E3 | P70_E4 | P70_E5  | P30 Cve p | P30 FDR | P70 Cve p | P70 FDR | P30C v P70C p | Age FDR | Cve p   | Cve FDR | r <sup>2</sup> | t        |
|-------------|---------------------------------------------------------|-------------|----|--------|--------|--------|--------|--------|--------|--------|--------|--------|--------|--------|--------|--------|--------|--------|--------|--------|--------|--------|---------|-----------|---------|-----------|---------|---------------|---------|---------|---------|----------------|----------|
| Abca2       | ATP-binding cassette, sub-family A (ABC1), member 2     | A1836521    | 2  | 7.814  | 7.368  | 8.487  | 7.661  | 7.975  | 7.845  | 8.15   | 8.444  | 8.629  | 7.686  | 8.01   | 7.705  | 8.508  | 6.446  | 7.672  | 7.686  | 7.796  | 7.823  | 5.115  | 7.006   | 0.63242   | 0.48314 | 0.08590   | 0.20257 | 0.29103       | 0.01662 | 0.07517 | 0.43937 | 0.09302        | 0.90578  |
| Abca5       | ATP-binding cassette, sub-family A (ABC1), member 5     | A1837166    | 11 | 8.364  | 7.329  | 8.303  | 8.074  | 8.442  | 7.028  | 7.723  | 7.997  | 6.16   | 8.069  | 7.802  | 7.491  | 7.459  | 7.47   | 8.16   | 6.534  | 7.484  | 7.861  | 8.105  | 8.183   | 0.11978   | 0.40892 | 0.62522   | 0.31527 | 0.12508       | 0.03384 | 0.73712 | 0.71368 | 0.10610        | -0.97445 |
| Abca7       | ATP-binding cassette, sub-family A (ABC1), member 7     | BQ554460    | 10 | 3.605  | 6.758  | 6.167  |        | 6.644  | 7.907  | 7.039  | 7.595  | 5.817  | 7.833  | 6.585  | 5.363  | 6.757  | 3.206  | 5.565  | 7.34   | 5.943  | 7.892  | 6.57   | 8.33    | 0.76731   | 0.51275 | 0.96910   | 0.38610 | 0.10805       | 0.04138 | 0.71285 | 0.70769 | 0.01249        | 0.31809  |
| Abca9       | ATP-binding cassette, sub-family A (ABC1), member 9     | A1447704    | 11 | 11.779 | 6.78   | 6.428  | 6.988  | 6.655  | 5.714  | 6.622  | 6.386  | 8.915  | 6.294  | 6.17   | 5.892  | 6.644  | 6.15   | 7.346  | 7.045  | 6.845  | 5.897  | 6.172  | 5.931   | 0.25532   | 0.41415 | 0.51683   | 0.29395 | 0.44043       | 0.01427 | 0.16931 | 0.49240 | 0.01058        | -0.29241 |
| Abcb10      | ATP-binding cassette, sub-family B (MDR/TAP), member 10 | BG065696    | 8  | 6.821  | 6.14   | 6.845  | 8.581  | 6.115  | 6.407  | 6.24   | 7.492  | 5.209  | 4.509  | 6.518  | 5.92   | 6.648  | 7.402  | 6.648  | 7.121  | 6.455  | 7.272  | 7.437  | 7.175   | 0.60469   | 0.47722 | 0.07218   | 0.19908 | 0.21071       | 0.01995 | 0.29180 | 0.55362 | 0.01990        | -0.40307 |
| Abcb1a      | ATP-binding cassette, sub-family B (MDR/TAP), member 1A | A1849213    | 5  | 7.383  | 7.348  | 7.678  | 8.318  | 7.175  |        | 8.004  | 7.294  | 7.458  | 7.619  | 7.514  | 6.457  | 7.281  | 7.121  | 7.297  | 6.526  | 7.748  | 7.392  | 7.051  | 7.164   | 0.13733   | 0.40801 | 0.15860   | 0.21970 | 0.96115       | 0.01357 | 0.02699 | 0.40589 | 0.00273        | 0.14792  |
| Abcb1b      | ATP-binding cassette, sub-family B (MDR/TAP), member 1B | BQ562618    | 5  | 6.399  | 6.785  | 5.679  | 7.745  | 6.527  | 8.121  | 8.835  | 8.318  | 6.889  | 7.504  | 7.366  | 8.396  | 6.993  | 6.74   |        | 9.13   | 8.158  | 7.52   | 6.153  | 7.762   | 0.17592   | 0.40803 | 0.75689   | 0.34150 | 0.02498       | 0.29714 | 0.50179 | 0.64258 | 0.14865        | -1.18189 |
| Abcb6       | ATP-binding cassette, sub-family B (MDR/TAP), member 6  | BG064268    | 1  | 9.528  | 9.314  | 8.239  | 8.954  | 8.619  | 9.296  | 8.462  | 8.447  | 8.256  | 8.414  | 8.825  | 8.797  | 8.501  | 9.419  | 8.647  | 9.324  | 8.421  | 9.015  | 8.945  | 8.756   | 0.74842   | 0.50856 | 0.21722   | 0.23286 | 0.26425       | 0.01744 | 0.54787 | 0.65895 | 0.00003        | 0.01550  |
| Abcb7       | ATP-binding cassette, sub-family B (MDR/TAP), member 7  | BG069454    | X  | 6.502  | 6.015  | 6.009  | 6.68   | 6.948  |        | 5.7    | 5.217  | 5.163  | 6.466  | 5.949  | 6.336  | 6.917  | 6.23   | 7.242  | 6.12   | 7.17   | 6.443  | 6.886  | 5.695   | 0.73829   | 0.50632 | 0.07723   | 0.20038 | 0.05112       | 0.12492 | 0.13200 | 0.47233 | 0.26400        | -1.69397 |
| Abcb8       | ATP-binding cassette, sub-family B (MDR/TAP), member 8  | A1840662    | 5  | 5.979  | 6.047  | 4.982  | 4.097  |        | 6.056  | 6.383  | 6.63   | 6.873  | 5.477  | 6.11   | 6.655  | 7      | 6.307  | 5.549  | 6.066  | 5.945  | 5.937  | 5.518  | 6.088   | 0.07105   | 0.41566 | 0.19502   | 0.22791 | 0.07912       | 0.06521 | 0.37995 | 0.59374 | 0.04983        | -0.64771 |
| Abcb9       | ATP-binding cassette, sub-family B (MDR/TAP), member 9  | A1839727    | 5  |        | 7.962  | 7.375  | 7.768  | 7.768  | 8.018  | 7.095  | 7.907  | 7.793  | 8.082  | 7.615  | 8.244  | 7.463  | 8.356  | 7.14   | 7.994  | 7.596  | 7.049  | 8.274  | 8.355   | 0.87815   | 0.53736 | 0.80962   | 0.35222 | 0.79841       | 0.01325 | 0.77607 | 0.72286 | 0.01915        | 0.39521  |
| Abcc1       | ATP-binding cassette, sub-family C (CFTR/MRP), member 1 | CK334466    | 16 | 7.396  | 7.208  | 6.392  | 6.305  | 6.948  | 5.88   | 4.274  | 7.836  | 5.626  | 7.479  | 6.57   | 6.093  | 6.622  | 6.477  | 4.809  |        | 7.176  | 7.051  | 5.545  | 6.508   | 0.10520   | 0.41020 | 0.67632   | 0.32542 | 0.38429       | 0.01486 | 0.61830 | 0.68151 | 0.00233        | -0.13656 |
| Abcc3       | ATP-binding cassette, sub-family C (CFTR/MRP), member 3 | BG069275    | 11 |        | 6.237  | 5.496  | 6.133  | 6.363  | 5.807  | 7.108  | 6.713  | 5.907  | 7.256  | 5.645  | 7.208  | 6.145  | 7.489  | 6.276  | 6.246  | 6.615  | 6.103  | 6.776  | 6.313   | 0.28273   | 0.41750 | 0.66146   | 0.32246 | 0.22908       | 0.01890 | 0.58477 | 0.67113 | 0.01559        | -0.35590 |
| Abcc4       | ATP-binding cassette, sub-family C (CFTR/MRP), member 4 | BQ561675    | 14 | 5.753  | 5.459  | 5.022  | 3.968  | 4.354  | 3.408  | 2.939  | 11.673 | 6.857  | 5.771  | 5.083  | 5.008  | 4.459  | 4.283  | 4.618  | 4.955  | 4.737  | 3.882  | 4.261  | 5.818   | 0.56423   | 0.46875 | 0.40717   | 0.27244 | 0.46819       | 0.01405 | 0.32457 | 0.56891 | 0.03202        | -0.51447 |
| Abcc5       | ATP-binding cassette, sub-family C (CFTR/MRP), member 5 | A1851781    | 16 | 0      | 6.197  | 0      | 5.284  | 5.498  | 9.06   | 6.226  | 7.876  | 7.586  | 8.847  | 6.539  | 4.674  | 3.351  | 0      | 4.03   | 3.121  | 5.959  | 7.656  | 3.376  |         | 0.85881   | 0.53304 | 0.03570   | 0.18903 | 0.01586       | 0.40773 | 0.31839 | 0.56606 | 0.00266        | 0.14594  |
| Abcc8       | ATP-binding cassette, sub-family C (CFTR/MRP), member 8 | A1841490    | 7  | 7.144  | 6.196  | 10.083 | 8.264  | 7.333  | 7.842  | 6.553  | 6.589  | 7.043  | 6.229  | 6.456  | 7.314  | 6.338  | 8.762  | 6.491  | 5.873  | 6.677  | 5.967  | 5.935  | 6.377   | 0.38740   | 0.43445 | 0.62458   | 0.31514 | 0.21911       | 0.01943 | 0.31716 | 0.56550 | 0.39275        | -2.27466 |
| Abcc9       | ATP-binding cassette, sub-family C (CFTR/MRP), member 9 | BQ557159    | 6  | 5.571  | 6.103  | 5.812  | 5.873  | 6.951  | 4.234  | 6.916  | 6.392  | 5.444  | 7.77   | 5.57   | 6.287  | 7.019  | 8.761  | 6.129  | 8.206  | 5.543  | 5.495  | 6.845  | 5.84    | 0.42580   | 0.44152 | 0.38385   | 0.26776 | 0.56256       | 0.01359 | 0.22368 | 0.52066 | 0.01816        | 0.38470  |
| Abcd2       | ATP-binding cassette, sub-family D (ALD), member 2      | A1847122    | 15 | 7.624  | 7.852  | 8.057  | 7.643  | 7.324  |        | 8.451  | 7.929  | 7.746  | 7.996  |        | 7.929  | 7.895  | 8.153  | 8.408  | 8.703  | 8.049  | 8.755  | 7.546  | 8.061   | 0.05663   | 0.41946 | 0.52684   | 0.29591 | 0.12795       | 0.03284 | 0.07610 | 0.43995 | 0.00162        | 0.11383  |
| Abcd3       | ATP-binding cassette, sub-family D (ALD), member 3      | A1838991    | 3  | 5.635  | 6.945  | 7      | 5.713  | 6.57   | 6.971  | 6.648  | 7.365  | 6.204  | 5.322  | 6.437  |        | 5.779  | 6.078  | 5.788  | 4.501  | 5.798  | 5.436  | 6.075  | 6       | 0.36203   | 0.42993 | 0.07210   | 0.19906 | 0.78499       | 0.01325 | 0.03203 | 0.40985 | 0.52015        | -2.94478 |
| Abcd4       | ATP-binding cassette, sub-family D (ALD), member 4      | BG073440    | 12 | 11.31  | 10.921 | 11.068 | 10.993 | 11.37  | 11.632 | 11.552 | 11.293 | 11.148 | 11.389 | 11.31  | 11.102 | 11.055 | 11.191 | 11.312 | 11.508 | 11.209 | 11.289 | 11.596 | 11.184  | 0.23826   | 0.41233 | 0.71400   | 0.33293 | 0.02026       | 0.35315 | 0.73572 | 0.71334 | 0.09633        | -0.92348 |
| Abce1       | ATP-binding cassette, sub-family E (OABP), member 1     | BG068195    | 8  | 9.542  | 9.663  | 9.585  | 9.473  | 9.872  | 9.49   | 9.843  | 9.56   | 9.558  | 9.831  | 10.002 | 9.261  | 9.704  | 9.593  | 10.348 | 9.913  | 9.526  | 10.786 | 9.96   | 9.828   | 0.45515   | 0.44707 | 0.15889   | 0.21977 | 0.77942       | 0.01324 | 0.10141 | 0.45526 | 0.16213        | 1.24418  |
| Abcf1       | ATP-binding cassette, sub-family F (GCN20), member 1    | CK334434    | 17 | 8.778  | 9.094  | 9.471  | 8.639  | 10.039 | 8.776  | 9.278  | 9.447  | 9.264  | 9.049  | 9.066  | 9.344  | 9.025  | 8.229  | 8.891  | 9.883  | 9.387  | 9.002  | 9.284  | 9.593   | 0.37769   | 0.43270 | 0.60995   | 0.31225 | 0.88539       | 0.01335 | 0.56611 | 0.66508 | 0.01765        | -0.37910 |
| Abcf2       | ATP-binding cassette, sub-family F (GCN20), member 2    | BG070598    | 5  | 8.514  | 7.858  | 7.748  | 8.319  | 7.713  | 7.936  | 8.043  | 6.933  | 7.254  | 8.332  | 7.436  | 8.2    | 7.626  | 8.634  | 6.872  | 11.804 | 7.731  | 7.665  | 7.651  | 6.99    | 0.44698   | 0.44551 | 0.48242   | 0.28724 | 0.31295       | 0.01607 | 0.68333 | 0.70002 | 0.07099        | -0.78185 |
| Abcf3       | ATP-binding cassette, sub-family F (GCN20), member 3    | AA073431    | 16 | 6.312  | 5.676  | 5.597  | 6.285  | 6.178  | 4.115  | 6.308  | 4.789  | 4.562  | 6.783  | 7.194  | 7.392  | 5.453  | 6.6    | 6.747  | 7.143  | 6.782  | 6.539  | 6.072  | 5.899   | 0.11029   | 0.40969 | 0.07245   | 0.19915 | 0.23465       | 0.01863 | 0.01486 | 0.39464 | 0.14956        | 1.18612  |
| Abcg1       | ATP-binding cassette, sub-family G (WHITE), member 1    | A1853792    | 17 | 8.589  | 8.299  | 7.921  | 8.883  | 9.018  | 8.602  | 9.005  | 9.011  | 8.956  | 8.294  | 9.388  | 8.402  | 8.774  | 9.205  | 8.683  | 8.102  | 8.542  | 8.801  | 8.55   | 8.472   | 0.22906   | 0.41146 | 0.16055   | 0.22014 | 0.37064       | 0.01504 | 0.84371 | 0.73784 | 0.00031        | -0.04957 |
| Abcg2       | ATP-binding cassette, sub-family G (WHITE), member 2    | BQ561807    | 6  | 6.933  | 6.495  | 7      | 7.975  | 7.137  | 7.195  | 7.261  | 8.763  | 6.701  | 6.388  | 7.164  | 7.15   | 6.376  | 6.837  | 6.821  | 7.495  | 7.897  | 7.171  | 7.655  | 7.466   | 0.42140   | 0.44069 | 0.53586   | 0.29766 | 0.75456       | 0.01325 | 0.94565 | 0.75835 | 0.18998        | -1.36979 |
| Abcg4       | ATP-binding cassette, sub-family G (WHITE), member 4    | A1846047    | 9  | 8.744  | 9.202  | 8.759  | 9.28   | 8.838  | 8.834  | 8.99   | 9.55   | 9.491  | 9.376  | 9.683  | 8.866  | 9.201  | 9.295  | 9.363  | 8.304  | 9.686  | 8.807  | 8.859  | 8.337   | 0.10703   | 0.41001 | 0.15653   | 0.21923 | 0.15915       | 0.02539 | 0.72283 | 0.71018 | 0.03888        | -0.56886 |
| Abhd1       | Abhydrolase domain containing 1                         | BQ562724    | 5  | 8.271  | 8.361  | 8.607  | 8.47   | 8.221  | 8.44   | 8.535  | 8.153  | 8.489  | 8.623  | 8.304  | 8.536  | 8.186  | 7.561  | 8.162  | 8.221  | 8.411  | 8.188  | 8.199  | 8.313   | 0.21593   | 0.41034 | 0.07893   | 0.20081 | 0.57408       | 0.01356 | 0.04255 | 0.41771 | 0.01207        | -0.31267 |
| Abhd10      | Abhydrolase domain containing 10                        | BG088307    | 16 | 7.108  | 7.468  | 7.792  | 6.392  | 7.451  | 7.334  | 8.785  | 7.811  | 6.586  | 6.714  | 6.651  | 5.263  | 5.306  | 5.456  | 5.07   | 7.269  | 7.406  | 6.745  | 6.678  | 0.01263 | 0.44313   | 0.19762 | 0.22850   | 0.67687 | 0.07747       | 0.01332 | 0.00747 | 0.38651 | 0.04114        | 0.58585  |
| Abhd11      | Abhydrolase domain containing 11                        | BG080565    | 5  | 6.888  | 7.841  | 6.804  | 7.194  | 6.152  | 7.962  | 7.401  | 7.561  | 8.075  | 6.785  | 7.466  | 6.636  | 5.905  | 6.803  | 7.637  | 6.965  | 7.221  | 7.577  | 7.832  | 6.945   | 0.36879   | 0.43112 | 0.41249   | 0.27350 | 0.14337       | 0.02850 | 0.88847 | 0.74712 | 0.09117        | 1.37506  |
| Abhd12      | Abhydrolase domain containing 12                        | BG072895    | 2  | 12.214 | 12.477 | 12.69  | 12.686 | 12.457 | 12.356 | 12.334 | 12.548 | 12.781 | 13.417 | 12.432 | 12.377 | 12.32  | 13.065 | 12.588 | 12.91  | 12.536 | 12.806 | 12.576 | 12.475  | 0.75670   | 0.51040 | 0.90516   | 0.37216 | 0.42693       | 0.01439 | 0.92550 | 0.75447 | 0.08416        | -0.85742 |
| Abhd13      | Abhydrolase domain containing 13                        | BG074070    | 8  | 6.713  | 5.62   | 6.877  | 5.2    | 6.017  | 2.992  | 8.4    | 6.12   | 6.122  | 7.609  | 5.758  | 7.114  | 6.944  | 7.92   | 7.175  | 7.588  | 5.374  | 7.229  | 7.426  | 6.913   | 0.09410   | 0.41154 | 0.55089   | 0.30237 | 0.87166       | 0.01332 | 0.16829 | 0.49185 | 0.32623        | 1.96814  |
| Abhd14a     | Abhydrolase domain containing 14A                       | BG076132    | 9  | 6.689  | 5.559  | 7.620  | 4.17   | 5.615  | 6.073  | 8.135  | 8.242  | 6.639  | 6.297  | 6.472  | 6.887  | 5.999  | 6.642  | 7.031  | 6.539  | 7.214  | 7.138  | 6.31   | 0.301   |           |         |           |         |               |         |         |         |                |          |

| Gene Symbol                            | Name                                                                             | Accession # | Ch | P30_C1 | P30_C2 | P30_C3 | P30_C4 | P30_C5 | P70_C1 | P70_C2 | P70_C3 | P70_C4 | P70_C5 | P30_E1 | P30_E2 | P30_E3 | P30_E4 | P30_E5 | P70_E1 | P70_E2 | P70_E3 | P70_E4 | P70_E5  | P30 Cve p | P30 FDR | P70 Cve p | P70 FDR | P30C v P70C p | Age FDR | Cve p   | Cve FDR | r <sup>2</sup> | t        |          |
|----------------------------------------|----------------------------------------------------------------------------------|-------------|----|--------|--------|--------|--------|--------|--------|--------|--------|--------|--------|--------|--------|--------|--------|--------|--------|--------|--------|--------|---------|-----------|---------|-----------|---------|---------------|---------|---------|---------|----------------|----------|----------|
| Acad10                                 | Acyl-Coenzyme A dehydrogenase family, member 10                                  | A1838780    | 5  | 7.167  | 7.719  | 5.734  | 6.476  | 5.628  | 7.282  | 7.358  | 7.46   | 7.64   | 6.358  | 7.15   | 7.077  | 6.729  | 6.248  | 6.705  | 7.392  | 7.085  | 6.736  | 6.158  | 6.669   | 0.60074   | 0.47638 | 0.21459   | 0.23228 | 0.18224       | 0.02232 | 0.75426 | 0.71778 | 0.00209        | 0.12952  |          |
| Acad8                                  | Acyl-Coenzyme A dehydrogenase family, member 8                                   | BG075387    | 9  | 7.284  | 6.34   | 5.868  | 6.165  | 9.048  | 7.212  | 6.479  | 7.933  | 7.029  | 7.028  | 7.756  | 7.022  | 6.375  | 7.275  | 6.615  | 8.186  | 7.498  | 7.125  | 6.331  | 7.229   | 0.91677   | 0.54608 | 0.72679   | 0.33549 | 0.76212       | 0.01324 | 0.77272 | 0.72209 | 0.47664        | 2.69921  |          |
| Acad9                                  | Acyl-Coenzyme A dehydrogenase family, member 9                                   | A1846542    | 3  | 6.043  | 6.382  | 6.057  | 6.253  | 6.505  | 5.794  | 5.935  | 6.426  | 6.266  | 5.515  | 7.084  | 5.939  | 4.881  | 6.209  | 5.675  | 6.157  | 5.55   | 6.666  | 5.164  | 5.933   | 0.45481   | 0.44700 | 0.76717   | 0.34358 | 0.19960       | 0.02074 | 0.41546 | 0.60882 | 0.46560        | 2.64010  |          |
| Acadl                                  | Acyl-Coenzyme A dehydrogenase, long-chain                                        | A1851564    | 1  | 8.452  | 8.606  | 8.919  | 8.523  | 7.566  |        | 8.715  | 8.509  | 9.178  | 8.426  | 8.421  | 9.344  | 8.577  | 8.205  | 8.543  | 8.249  | 8.682  | 8.465  | 8.438  | 8.123   | 0.51043   | 0.45787 | 0.12933   | 0.21299 | 0.35423       | 0.01529 | 0.83083 | 0.73507 | 0.03198        | -0.51408 |          |
| Acadm                                  | Acyl-Coenzyme A dehydrogenase, medium chain                                      | A1840666    | 3  | 5.642  | 1.259  | 6.37   | 5.871  | 5.499  | 6.803  | 7.651  | 5.307  | 5      | 5.762  | 6.329  | 4.813  | 5.564  | 4.799  | 4.539  | 5.426  | 6.999  | 4.844  | 3.974  | 4.408   | 0.78306   | 0.51624 | 0.21305   | 0.23194 | 0.29576       | 0.01649 | 0.57535 | 0.66810 | 0.01606        | 0.36140  |          |
| Acads                                  | Acyl-Coenzyme A dehydrogenase, short chain                                       | BG065033    | 5  | 8.241  | 5.432  | 5.55   | 5.251  | 6.044  | 5.919  | 5.513  | 5.29   | 5.831  | 6.284  | 10.366 | 5.886  | 6.301  | 4.877  | 5.542  | 4.988  | 5.084  | 6.543  | 5.322  | 6.278   | 0.67184   | 0.49166 | 0.74107   | 0.33834 | 0.57573       | 0.01355 | 0.75512 | 0.71798 | 0.10922        | 0.99039  |          |
| Acadvl                                 | Acyl-Coenzyme A dehydrogenase, very long chain                                   | A1839605    | 11 | 6.203  | 6.224  | 5.672  | 6.78   | 5.239  | 6.519  | 7.231  | 6.415  | 7.532  | 7.209  | 7.038  | 6.485  | 6.199  | 8.201  | 7.046  | 7.207  | 6.093  | 7.058  | 6.89   | 7.391   | 0.05502   | 0.41996 | 0.86878   | 0.36446 | 0.02312       | 0.31804 | 0.14154 | 0.47750 | 0.00324        | -0.16137 |          |
| Acat1                                  | Acetyl-Coenzyme A acetyltransferase 1                                            | BG070487    | 9  | 8.758  | 8.547  | 9.246  | 8.566  | 9.112  | 9.495  | 9.205  | 9.045  | 9.562  | 8.807  | 8.873  | 8.807  | 8.928  | 9.081  | 8.945  | 8.102  | 8.548  | 8.877  | 9.263  | 8.857   | 0.60297   | 0.47685 | 0.07295   | 0.19928 | 0.09621       | 0.04883 | 0.18804 | 0.50228 | 0.03245        | 0.51800  |          |
| Acat2                                  | Acetyl-Coenzyme A acetyltransferase 2                                            | A1845300    | 17 | 11.792 |        | 11.541 | 11.197 | 11.405 | 11.816 | 11.693 | 11.584 | 11.897 | 11.692 | 11.793 | 11.74  | 11.717 | 12.332 | 11.813 | 11.666 | 11.795 | 11.827 | 11.817 | 11.733  | 0.05294   | 0.42064 | 0.62961   | 0.31614 | 0.08445       | 0.05913 | 0.04742 | 0.42119 | 0.19808        | 1.40572  |          |
| Acbdb3                                 | Acyl-Coenzyme A binding domain containing 3                                      | A1838572    | 1  | 7.852  | 7.671  | 8.023  | 7.876  | 8.018  | 7.587  | 8.14   | 8.365  | 8.193  | 8.039  | 7.575  | 7.529  | 7.618  | 6.83   | 7.7    | 7.768  | 7.852  | 8.225  | 7.907  | 8.036   | 0.03322   | 0.42893 | 0.50352   | 0.29136 | 0.25970       | 0.01760 | 0.06793 | 0.43481 |                | 0.53668  | -3.04411 |
| Acbdb4                                 | Acyl-Coenzyme A binding domain containing 4                                      | BQ559510    | 11 | 6.714  | 6.854  | 5.937  | 6.375  | 6.688  | 5.249  | 7.722  | 6.514  | 6.832  | 6.595  | 6.346  | 6.548  | 6.501  | 6.42   | 6.842  | 7.047  | 6.538  | 6.499  | 6.676  | 7.022   | 0.92561   | 0.54808 | 0.68496   | 0.32715 | 0.87658       | 0.01333 | 0.66388 | 0.69472 | 0.15636        | 1.21768  |          |
| Acdb5                                  | Acyl-Coenzyme A binding domain containing 5                                      | BG070817    | 2  | 6.939  | 8.365  | 7.833  | 6.635  | 7.263  | 6.659  | 6.684  | 7.288  | 3      | 6.986  | 7.818  | 7.568  | 7.811  | 8.828  | 7.134  | 7.228  | 6.278  | 6.921  | 7.539  | 7.528   | 0.33860   | 0.42595 | 0.27013   | 0.24430 | 0.16870       | 0.02395 | 0.17849 | 0.49728 | 0.07335        | -0.79576 |          |
| Acdb6                                  | Acyl-Coenzyme A binding domain containing 6                                      | A1841390    | 1  | 5.747  | 5.854  | 5.285  | 4.835  | 4.818  | 1.467  | 6.066  | 5.997  | 4.781  | 2.385  | 7.255  |        | 4.689  | 5.18   | 5.631  | 4.835  | 5.227  | 4.136  | 5.664  | 3.92    | 0.50930   | 0.45765 | 0.55358   | 0.30113 | 0.26192       | 0.01752 | 0.47327 | 0.63186 | 0.02992        | 0.49670  |          |
| Accn1                                  | Amiloride-sensitive cation channel 1, neuronal (degenerin)                       | A1851029    | 11 | 9.731  | 9.277  | 9.303  | 9.573  | 9.503  | 9.665  | 9.055  | 9.302  | 9.434  | 8.951  | 9.213  | 9.292  | 8.874  | 9.397  | 9.385  | 9.906  | 9.464  | 9.476  | 8.722  | 9.318   | 0.09163   | 0.41189 | 0.68839   | 0.32783 | 0.23960       | 0.01840 | 0.57466 | 0.66788 | 0.05120        | -0.65705 |          |
| Accn1/Chr1 trans-spliced mRNA sequence | Accn1/Chr1 trans-spliced mRNA sequence                                           | BG067002    | 1  | 5.727  | 6.821  | 7.021  | 7.564  | 6.916  | 5.544  | 6.508  | 6.779  | 6.954  | 7.291  | 5.954  | 6.516  | 6.172  | 6.067  | 6.327  | 6.433  | 6.408  | 7.192  | 6.481  | 6.938   | 0.09262   | 0.41175 | 0.82859   | 0.35612 | 0.65666       | 0.01335 | 0.27469 | 0.54552 | 0.03836        | 0.56488  |          |
| Accn2                                  | Amiloride-sensitive cation channel 2, neuronal                                   | A1843610    | 15 | 8.663  | 7.685  | 7.847  | 7.709  | 8.507  | 7.847  | 7.566  | 7.908  | 7.52   | 8.386  | 7.882  | 8.243  | 7.794  | 7.92   | 8.231  | 8.457  | 8.198  | 7.842  | 7.607  | 8.2     | 0.77296   | 0.51400 | 0.34688   | 0.26025 | 0.38875       | 0.01480 | 0.63725 | 0.68714 | 0.00931        | 0.27423  |          |
| Accn3                                  | Amiloride-sensitive cation channel 3                                             | A1414211    | 5  | 6.019  | 5.874  | 6.761  |        | 5.985  | 6.658  |        | 7.616  | 6.536  | 7.149  | 5.937  | 6.091  | 6.473  | 7.132  | 5.964  | 8.222  | 6.492  | 6.179  | 6.578  | 6.241   | 0.62324   | 0.48118 | 0.62207   | 0.31465 | 0.04090       | 0.17040 | 0.88988 | 0.74741 | 0.10790        | 0.98369  |          |
| Accs                                   | 1-aminocyclopropane-1-carboxylate synthase homolog (Arabidopsis)(non-functional) | BQ553048    | 2  | 6.331  | 6.309  | 4.065  | 5.589  | 4.216  |        | 5.859  | 6.131  | 5.945  | 1.585  | 5.801  | 4.542  | 5.504  | 6.195  | 5.884  | 4.639  | 5.713  | 6.875  | 4.892  | 8.693   | 0.63187   | 0.48302 | 0.35045   | 0.26098 | 0.71658       | 0.01327 | 0.25364 | 0.53544 |                | 0.10428  | -0.96507 |
| Acd                                    | Adrenocortical dysplasia                                                         | BQ553313    | 8  | 5.029  | 6.148  | 5.416  | 6.022  | 6.611  | 6.445  | 6.7    | 6.472  | 5.454  | 7.623  | 7.46   | 4.388  | 5.109  | 5.421  | 4.967  | 5.037  | 5.741  | 5.371  | 4.087  | 6.429   | 0.96936   | 0.55816 | 0.04889   | 0.19292 | 0.04192       | 0.16488 | 0.17348 | 0.49463 | 0.29732        | 1.83982  |          |
| Ache                                   | Acetylcholinesterase                                                             | A1847791    | 5  | 6.436  | 7.052  | 8.167  | 7.991  | 9.125  | 7.627  | 7.186  | 7.046  | 7.112  | 7.683  | 7.292  | 8.211  | 8.29   | 6.837  | 7.43   | 7.67   | 7.329  | 8.154  | 7      | 7.19    | 0.79993   | 0.51998 | 0.58742   | 0.30779 | 0.40780       | 0.01458 | 0.99403 | 0.76730 | 0.06490        | -0.74511 |          |
| Acin1                                  | Apoptotic chromatin condensation inducer 1                                       | A1448352    | 14 | 7.914  | 7.742  | 7.699  |        | 7.451  | 8.407  | 8.235  | 8.451  | 8.028  | 8.2    | 8.087  | 7.493  | 7.713  | 8.306  | 8.044  |        | 7.735  | 8.612  | 8.167  | 8.21    | 0.25693   | 0.41433 | 0.65724   | 0.32163 | 0.00228       | 0.55028 | 0.87077 | 0.74350 |                | 0.12033  | -1.04612 |
| Acly                                   | ATP citrate lyase                                                                | A1841630    | 11 | 10.903 | 11.003 | 11.169 | 11.087 | 10.936 | 11.094 | 11.139 | 11.088 | 10.943 | 11.213 | 11.12  | 11.139 | 11.088 | 10.967 | 11.407 | 10.805 | 11.196 | 10.564 | 10.944 | 11.347  | 0.67687   | 0.49276 | 0.82774   | 0.35594 | 0.84222       | 0.01328 | 0.93091 | 0.75552 | 0.12381        | 1.05341  |          |
| Acn9                                   | ACN9 homolog (S. cerevisiae)                                                     | A1848347    | 6  | 10.331 | 9.734  | 9.792  | 10.077 | 10.41  | 10.482 | 10.016 | 9.977  | 9.7    | 9.826  | 9.634  | 9.85   | 9.627  | 9.606  | 9.423  | 9.913  | 9.508  | 9.793  | 10.05  | 10.012  | 0.02025   | 0.43654 | 0.40613   | 0.27223 | 0.72836       | 0.01326 | 0.01855 | 0.39840 | 0.21861        | 1.49605  |          |
| Acn1                                   | Aconitase 1                                                                      | BG063382    | 4  | 8.541  | 7.015  | 7.001  | 7.174  | 8.121  | 7.366  | 7.797  | 7.197  | 7.585  | 7.045  | 7.368  | 7.333  | 7.168  | 7.737  | 7.811  | 7.922  | 6.962  | 7.448  | 7.227  | 7.017   | 0.75162   | 0.50927 | 0.30739   | 0.25209 | 0.65866       | 0.01335 | 0.89298 | 0.74803 | 0.01365        | -0.33274 |          |
| Acn2                                   | Aconitase 2, mitochondrial                                                       | BG075401    | 15 | 8.543  | 9.145  | 8.727  | 8.424  | 9.217  | 8.37   | 8.907  | 7.948  | 8      | 7.976  | 8.381  | 8.851  | 9.008  | 8.168  | 8.468  | 8.948  | 8.953  | 10.567 | 9.808  | 9.071   | 0.31827   | 0.42269 | 0.01006   | 0.18007 | 0.04658       | 0.14267 | 0.08087 | 0.44293 | 0.07056        | -0.77931 |          |
| Acti010                                | Acyl-CoA thioesterase 10                                                         | A1427919    | 15 | 7.141  | 6.445  | 5.582  | 6.815  | 6.245  | 7.176  | 6.941  | 5.725  | 7.484  | 6.595  | 5.869  | 5.881  | 6.644  | 6.435  | 7.206  | 5.729  | 6.809  | 6.165  | 6.107  | 5.103   | 0.91843   | 0.54645 | 0.06708   | 0.19776 | 0.34095       | 0.01551 | 0.11873 | 0.46500 | 0.03187        | -0.51321 |          |
| Act03                                  | Acyl-CoA thioesterase 3                                                          | BQ556371    | 12 | 5.459  | 10.132 | 6.459  | 6.36   | 6.112  | 12.437 | 6.237  | 5.019  | 5.322  | 5.62   | 3.759  | 6.781  | 4.524  | 4.6    | 5.602  | 4.919  | 6.364  | 4.716  | 4.862  | 4.844   | 0.09462   | 0.41147 | 0.31005   | 0.25264 | 0.91712       | 0.01342 | 0.05306 | 0.42566 | 0.06071        | 0.71906  |          |
| Act06                                  | Acyl-CoA thioesterase 6                                                          | BQ555318    | 12 | 7.464  | 6.535  | 6.603  | 7.14   | 5.93   | 6.661  | 6.138  | 6.93   | 6.574  | 6.626  | 6.047  | 6.989  | 6.549  | 6.769  | 8.317  | 6.753  | 7.523  | 7.007  | 7.61   | 6.66449 | 0.49005   | 0.09110 | 0.20386   | 0.94952 | 0.01352       | 0.31275 | 0.56345 | 0.13017 | -1.09471       |          |          |
| Act07                                  | Acyl-CoA thioesterase 7                                                          | BG069979    | 4  | 6.183  | 8.984  | 6.435  | 4.357  | 4.438  | 2.293  | 5.844  | 5.494  | 5.417  | 5.759  | 5.312  | 6.829  | 5.635  | 5.615  | 5.055  | 5.875  | 5.325  | 5.11   | 5.807  | 6.508   | 0.67500   | 0.49235 | 0.31632   | 0.25395 | 0.33021       | 0.01571 | 0.74779 | 0.71624 | 0.00490        | -0.19849 |          |
| Act09                                  | Acyl-CoA thioesterase 9                                                          | BG063815    | X  | 7.699  | 7.761  | 7.244  | 6.567  | 7.455  | 6.681  | 5.766  | 6      | 7.816  | 7.648  | 7.102  | 7.786  | 7.561  | 7.142  | 6.312  | 7.391  | 7.43   | 7.588  | 6.666  | 0.29411 | 0.41907   | 0.56497 | 0.30337   | 0.66439 | 0.01334       | 0.64809 | 0.69027 | 0.06374 | 0.73801        |          |          |
| Actox1                                 | Acyl-Coenzyme A oxidase 1, palmitoyl                                             | BG064038    | 11 | 6.697  | 7.655  | 7.6    | 6.472  | 7.52   | 6.803  | 6.808  | 6.962  | 7.259  | 7.066  | 7.286  | 6.742  | 7.578  | 7.12   | 7.881  | 7.491  | 9.031  | 7.392  | 7.278  | 7.588   | 0.68663   | 0.49490 | 0.04859   | 0.19284 | 0.45165       | 0.01418 | 0.06521 | 0.43307 | 0.00932        | -0.27431 |          |
| Actox2                                 | Acyl-Coenzyme A oxidase 2, branched chain                                        | A1324849    | 14 | 6.989  | 7.761  | 7.244  | 6.567  | 7.455  | 6.681  | 5.766  | 6      | 7.816  | 7.648  | 7.102  | 7.786  | 7.561  | 7.142  | 6.312  | 7.391  | 7.43   | 7.588  | 6.666  | 0.49873 | 0.45556   | 0.55992 | 0.30238   | 0.39043 | 0.01478       | 0.43654 | 0.61743 | 0.00016 | 0.03554        |          |          |
| Actox3                                 | Acyl-Coenzyme A oxidase 3, pristanoyl                                            | BQ552447    | 5  | 4.736  | 6.103  | 5.552  | 4.447  | 2.722  | 6.224  | 5.798  | 5.146  | 5.714  | 6.503  | 4.358  | 3.641  | 7.095  | 3.7    | 5.152  | 6.136  | 5.249  | 6.256  | 7.206  | 6.575   | 0.33640   | 0.42559 | 0.14388   | 0.21634 | 0.89198       | 0.01336 | 0.80461 | 0.72932 | 0.00002        |          |          |

| Gene Symbol | Name                                                                                                      | Accession # | Ch | P30_C1 | P30_C2 | P30_C3 | P30_C4 | P30_C5 | P70_C1 | P70_C2 | P70_C3 | P70_C4 | P70_C5 | P30_E1 | P30_E2 | P30_E3 | P30_E4 | P30_E5 | P70_E1 | P70_E2 | P70_E3 | P70_E4 | P70_E5  | P30 CvE p | P30 FDR | P70 CvE p | P70 FDR | P30C v P70C p | Age FDR | CvE p   | CvE FDR | r <sup>2</sup> | t        |
|-------------|-----------------------------------------------------------------------------------------------------------|-------------|----|--------|--------|--------|--------|--------|--------|--------|--------|--------|--------|--------|--------|--------|--------|--------|--------|--------|--------|--------|---------|-----------|---------|-----------|---------|---------------|---------|---------|---------|----------------|----------|
| Actr2       | ARP2 actin-related protein 2 homolog (yeast)                                                              | CK335034    | 11 | 10.268 | 9.923  | 9.997  | 10.422 | 9.884  | 10.13  | 10.2   | 9.697  | 10.379 | 10.162 | 10.033 | 10.404 | 10.508 | 10.366 | 10.133 | 10.237 | 10.065 | 10.343 | 10.045 | 10.132  | 0.20404   | 0.40947 | 0.69689   | 0.32953 | 0.92582       | 0.01345 | 0.19884 | 0.50794 | 0.04238        | -0.59502 |
| Actr3       | ARP3 actin-related protein 3 homolog (yeast)                                                              | BG064070    | 1  | 7.852  | 7.857  | 8.274  | 7.883  | 8.497  | 7.17   | 8.126  | 7.997  | 8.45   | 8.019  | 8.105  | 8.123  | 9.276  | 7.561  | 8.328  | 8.201  | 7.844  | 8.005  | 8.234  | 9.156   | 0.52466   | 0.46071 | 0.31236   | 0.25312 | 0.64328       | 0.01338 | 0.20927 | 0.51335 | 0.03111        | 0.50684  |
| Actr3b      | ARP3 actin-related protein 3 homolog B (yeast)                                                            | A1838905    | 5  | 5.766  | 6.04   | 5.527  | 5.653  | 5.767  | 6.831  | 3.382  | 5.409  | 6.949  | 6.428  | 5.374  | 5.954  | 6.19   | 5.19   | 6.19   | 4.907  | 6.12   | 5.863  | 6.538  | 5.66    | 0.90114   | 0.54254 | 0.98077   | 0.38873 | 0.94308       | 0.01350 | 0.94802 | 0.75880 | 0.06965        | 0.77390  |
| Actr6       | ARP6 actin-related protein 6 homolog (yeast)                                                              | BG071727    | 10 | 6.4    | 6.375  | 7.431  | 5.756  | 6.653  |        | 5.933  | 6.921  | 5.677  | 7.155  | 7.098  | 7.068  | 6.343  | 6.09   | 5.256  | 6.823  | 6.932  | 5.778  | 6.213  | 7.655   | 0.73644   | 0.50591 | 0.60967   | 0.31219 | 0.82517       | 0.01326 | 0.87929 | 0.74526 | 0.09771        | -0.93078 |
| Actr8       | ARP8 actin-related protein 8 homolog (S. cerevisiae)                                                      | BG067817    | 14 | 7.989  | 6.66   | 6.87   | 6.97   | 8.044  | 4.895  | 7.186  | 6.267  | 6.925  | 6.65   | 6.879  | 7.102  | 3.02   | 1.85   | 6.417  |        | 6.869  | 7.168  | 6.719  | 6.242   | 0.08119   | 0.41360 | 0.47788   | 0.28635 | 0.10151       | 0.04521 | 0.14763 | 0.48078 | 0.04120        | 0.58632  |
| Acvr1b      | Activin A receptor, type 1B                                                                               | A1851648    | 15 | 5.321  | 5.754  | 4.476  | 5.525  | 5.061  | 5.933  | 6.032  | 6.306  | 6.585  | 5.813  | 6.457  | 5.783  | 7.476  | 6.153  | 5.775  | 5.694  | 6.585  | 6.733  | 6.28   | 0.00780 | 0.44949   | 0.97360 | 0.38711   | 0.00827 | 0.50280       | 0.02346 | 0.40294 | 0.57735 | -3.30575       |          |
| Acvr2a      | Activin receptor IIA                                                                                      | BG079366    | 2  | 6.418  | 7.158  | 7.18   | 7.113  | 6.899  | 6.253  | 6.543  | 6.627  | 7.355  | 7.754  | 6.953  | 6.397  | 6.974  | 8.028  | 7.675  | 6.598  | 6.87   | 8.147  | 6.731  | 7.153   | 0.45701   | 0.44742 | 0.57009   | 0.30438 | 0.88403       | 0.01334 | 0.32490 | 0.56907 | 0.46363        | 2.62963  |
| Acvr2b      | Activin receptor IIB                                                                                      | BQ550869    | 9  | 6.043  | 5.623  | 5.755  | 5.265  | 5.861  | 6.539  | 4.707  | 6.077  | 6.539  | 5.911  | 6.235  | 6.831  | 5.707  | 6.174  | 6.502  | 6.599  | 6.525  | 5.974  | 6.64   | 6.317   | 0.03412   | 0.42847 | 0.23761   | 0.23735 | 0.51548       | 0.01378 | 0.02097 | 0.40070 | 0.27983        | -1.76309 |
| Acvr1       | Activin A receptor, type II-like 1                                                                        | A1427544    | 15 | 6.902  | 6.845  | 6.238  | 7.644  | 6.361  | 7.881  | 6.4    | 6.663  | 8.276  | 5.846  | 6.582  | 7.863  | 6.978  | 6.648  | 6.255  |        | 6.814  | 7.785  | 6.984  | 7.063   | 0.86048   | 0.53341 | 0.79635   | 0.34950 | 0.69077       | 0.01330 | 0.77299 | 0.72215 | 0.00380        | 0.17476  |
| Acy1        | Aminoacylase 1                                                                                            | BQ553977    | 9  | 8.254  | 7.672  | 7.166  | 7.007  | 7.383  |        | 7.794  | 7.776  | 7.618  | 7.648  | 8.543  | 7.344  | 8.123  | 8.076  | 7.864  | 8.064  | 8.582  | 7.687  | 8.1    | 7.634   | 0.13185   | 0.40823 | 0.16740   | 0.22169 | 0.42724       | 0.01439 | 0.03048 | 0.40868 | 0.39915        | -2.30533 |
| Acy3        | Aspartoacylase (aminoacylase) 3                                                                           | BG064737    | 19 | 7.086  | 7.495  | 7.62   | 7.22   | 7.684  | 7.066  | 8.017  | 7.54   | 6.844  | 6.592  | 8.041  | 7.886  | 8.596  | 7.05   | 7.651  | 7.8    | 7.303  | 7.746  | 8.242  | 7.483   | 0.16529   | 0.40776 | 0.13271   | 0.21377 | 0.47576       | 0.01400 | 0.03036 | 0.40859 | 0.00023        | 0.04296  |
| Acyp1       | Acylphosphatase 1, erythrocyte (common) type                                                              | A1325944    | 12 | 10.221 | 9.887  | 9.786  | 10.059 | 9.389  | 9.196  | 10.06  | 9.77   | 9.809  | 9.151  | 10.063 | 10.352 | 10.188 | 9.909  | 9.95   | 9.778  | 10.287 | 10.23  | 9.96   | 10.148  | 0.20569   | 0.40958 | 0.04449   | 0.19167 | 0.26982       | 0.01725 | 0.01447 | 0.39425 | 0.00840        | 0.26026  |
| Acyp2       | Acylphosphatase 2, muscle type                                                                            | A1327338    | 11 | 10.145 | 10.309 | 9.762  | 9.698  | 10.429 | 9.849  | 9.285  | 9.792  | 9.646  | 11.982 | 9.93   |        | 10.043 | 10.095 | 9.813  | 9.976  | 9.812  | 10.244 | 9.309  | 10.287  | 0.58999   | 0.47411 | 0.72579   | 0.33529 | 0.93478       | 0.01348 | 0.59401 | 0.67405 | 0.07778        | 0.82142  |
| Ada         | Adenosine deaminase                                                                                       | BQ559341    | 2  | 6.842  | 6.984  | 6.724  | 7.257  | 6.09   |        | 5.854  | 6.816  | 7.925  | 8.925  | 6.454  | 6.34   | 6.34   | 5.585  | 6.17   | 7.732  | 6.404  | 6.058  | 6.04   | 6.61    | 0.04163   | 0.42494 | 0.27359   | 0.24503 | 0.36683       | 0.01506 | 0.06887 | 0.43541 | 0.01048        | 0.29113  |
| Adam10      | A disintegrin and metallopeptidase domain 10                                                              | A1661341    | 9  | 10.208 | 9.713  | 9.988  | 9.635  | 10.005 | 9.449  | 10.303 | 9.811  | 9.811  | 10.252 | 9.824  | 9.518  | 9.453  | 9.355  | 9.809  | 9.896  | 9.586  | 9.773  | 9.715  | 9.519   | 0.05474   | 0.42005 | 0.22283   | 0.23411 | 0.93734       | 0.01348 | 0.01967 | 0.39948 | 0.26024        | 1.67760  |
| Adam11      | A disintegrin and metallopeptidase domain 11                                                              | A1849742    | 11 | 10.419 | 9.982  | 10.522 | 10.582 | 10.202 | 10.051 | 10.364 | 10.468 | 10.555 | 10.457 | 10.473 | 10.068 | 10.501 | 10.618 | 10.843 | 10.384 | 10.463 | 10.32  | 10.558 | 10.33   | 0.37089   | 0.43150 | 0.75277   | 0.34068 | 0.79655       | 0.01325 | 0.31817 | 0.56596 | 0.01970        | 0.40092  |
| Adam17      | A disintegrin and metallopeptidase domain 17                                                              | BQ552426    | 12 | 5.937  | 5.477  | 5.651  | 6.276  | 4.996  | 7.157  | 7.976  | 8.177  | 5.932  | 5.359  | 7.522  | 4.082  | 5.64   | 7.019  | 9.811  | 2      | 7.305  | 3.424  | 6.963  | 7.026   | 0.27640   | 0.41668 | 0.23632   | 0.23707 | 0.06857       | 0.08105 | 0.79392 | 0.72693 | 0.49890        | 2.82221  |
| Adam19      | A disintegrin and metallopeptidase domain 19 (meltrin beta)                                               | CK334137    | 11 | 6.628  | 7.432  | 6.603  | 6.356  | 7.856  | 5.492  | 6.521  | 6.78   | 6.151  | 6.644  | 8.138  | 7.629  | 7.773  | 7.693  | 6.827  | 6.429  | 6.969  | 7.057  | 6.47   | 7.566   | 0.11243   | 0.40950 | 0.10008   | 0.20605 | 0.11126       | 0.03972 | 0.04066 | 0.41632 | 0.03457        | 0.53526  |
| Adam21      | A disintegrin and metallopeptidase domain 21                                                              | BQ558598    | 12 | 9.57   | 4.926  | 6.623  | 6.585  | 5.642  | 8.387  | 9.64   | 7.963  | 7.463  | 5.461  | 7.732  | 10.877 | 5.204  | 5.854  | 5.57   | 6.977  | 8.771  | 7.195  | 6.38   | 6.73    | 0.78118   | 0.51582 | 0.49398   | 0.28950 | 0.31786       | 0.01596 | 0.89848 | 0.74914 | 0.01684        | 0.37020  |
| Adam22      | A disintegrin and metallopeptidase domain 22                                                              | BQ558528    | 5  | 7.553  | 8.178  | 6.794  | 6.156  | 7.063  | 8.704  | 6.966  | 7.123  | 6.738  | 7.031  | 6.996  | 7.151  | 6.97   | 5.308  | 7.47   | 7.413  | 7.378  | 7.945  | 6.388  | 5.9     | 0.48917   | 0.45368 | 0.57186   | 0.30473 | 0.75435       | 0.01325 | 0.34182 | 0.57678 | 0.08574        | 0.86614  |
| Adam23      | A disintegrin and metallopeptidase domain 23                                                              | BQ559031    | 1  | 5.552  | 4.399  | 6.8    | 7.748  | 5.426  | 5.131  | 5.22   | 4.587  | 5.337  | 6.142  | 3.983  | 4.973  | 4.496  | 4.382  | 5.125  | 6.011  | 5.728  | 5.886  | 5.209  | 4.851   | 0.05423   | 0.42022 | 0.46775   | 0.28438 | 0.30065       | 0.01637 | 0.15585 | 0.48519 | 0.32432        | 1.95959  |
| Adam8       | A disintegrin and metallopeptidase domain 8 (meltrin gamma)                                               | A1846627    | 7  | 9.959  | 6.359  | 6.52   | 6.856  | 6.675  | 7.272  | 7.129  | 7.565  | 6.797  | 7.987  | 5.94   | 6.387  | 6.295  | 6.536  | 5.476  | 5.802  | 6.439  | 6.436  | 6      | 6.684   | 0.19246   | 0.40876 | 0.00310   | 0.17662 | 0.00852       | 0.50014 | 0.05609 | 0.38348 | 0.00920        | -0.27255 |
| Adam9       | A disintegrin-like and metallopeptidase (repolysin type) with thrombospondin type 1 motif, 1              | BQ552690    | 8  | 8.595  | 9.464  | 8.732  | 9.043  | 8.927  | 14.247 | 8.507  | 9.426  | 8.156  | 8.593  | 9.274  | 9.231  | 8.954  | 8.791  | 9.05   | 8.648  | 9.288  | 8.982  | 9.017  | 8.74    | 0.55283   | 0.46642 | 0.47690   | 0.28616 | 0.48713       | 0.01393 | 0.51664 | 0.64799 | 0.00688        | -0.23538 |
| Adamts1     | A disintegrin-like and metallopeptidase (repolysin type) with thrombospondin type 1 motif, 1              | BG065692    | 16 | 5.739  | 6.585  | 5.346  | 5.187  | 8.707  | 3.822  | 6.155  | 6.254  | 7.144  | 5.213  | 6.567  | 5.948  | 6.411  | 6.423  | 5.701  | 7.869  | 5.316  | 5.426  | 5.722  | 6.794   | 0.88120   | 0.53805 | 0.51483   | 0.29356 | 0.50717       | 0.01382 | 0.67909 | 0.69888 | 0.44361        | -2.52556 |
| Adamts10    | A disintegrin-like and metallopeptidase (repolysin type) with thrombospondin type 1 motif, 10             | A1428523    | 17 | 7.622  | 7.543  | 7.397  | 6.731  | 7.559  | 10.834 | 7.627  | 7.634  | 7.594  | 8.172  | 7.88   | 7.469  | 6.585  | 8.354  | 8.041  |        | 7.138  | 7.925  | 7.196  | 7.52    | 0.29206   | 0.41878 | 0.24216   | 0.23834 | 0.15952       | 0.02533 | 0.49939 | 0.64169 | 0.01136        | 0.30324  |
| Adamts12    | A disintegrin-like and metallopeptidase (repolysin type) with thrombospondin type 1 motif, 12             | BQ552224    | 15 | 5.498  | 4.924  | 4.939  | 5.672  | 6.629  | 5.874  | 2.533  | 4.926  | 5.459  |        | 5.079  | 6.781  | 5.395  | 5.431  | 5.703  | 4.459  | 5.383  | 4.912  | 6.564  | 5.375   | 0.74278   | 0.50731 | 0.43144   | 0.27726 | 0.30000       | 0.01638 | 0.42776 | 0.61388 | 0.08382        | -0.85554 |
| Adamts14    | A disintegrin-like and metallopeptidase (repolysin type) with thrombospondin type 1 motif, 14             | BQ559214    | 10 | 6.516  | 6.107  | 5.107  | 7.93   | 6.623  | 6.376  | 6.856  | 6.168  | 6.365  | 4.415  | 5.95   | 5.689  | 5.728  | 6.445  | 6.251  | 4.847  | 6.346  | 5.462  | 5.536  | 5.225   | 0.38060   | 0.43322 | 0.28999   | 0.24846 | 0.51664       | 0.01378 | 0.16142 | 0.48817 | 0.05664        | 0.69304  |
| Adamts17    | A disintegrin-like and metallopeptidase (repolysin type) with thrombospondin type 1 motif, 17             | BG075964    | 7  | 6.025  | 6.345  | 6.597  | 5.433  | 5.774  | 4.443  | 5.417  | 6.443  | 5.615  | 6.25   | 5.958  | 6.54   | 7.11   | 6.53   | 5.178  | 6.093  | 5.749  | 6.437  | 6.002  | 6.624   | 0.57028   | 0.47000 | 0.19445   | 0.22779 | 0.35514       | 0.01527 | 0.16254 | 0.48877 | 0.10095        | -0.94776 |
| Adamts19    | A disintegrin-like and metallopeptidase (repolysin type) with thrombospondin type 1 motif, 19             | CK335120    | 18 | 7.174  | 6.951  | 7.083  | 6.655  | 6.299  |        | 6.113  | 6.347  | 6.115  | 5.325  | 7.202  | 5.74   | 6.753  | 6.913  | 6.714  | 6.167  | 6.549  | 6.392  | 6.459  | 7.126   | 0.58302   | 0.47265 | 0.07286   | 0.19925 | 0.01484       | 0.42065 | 0.53413 | 0.65420 | 0.00037        | -0.05426 |
| Adamts2     | A disintegrin-like and metallopeptidase (repolysin type) with thrombospondin type 1 motif, 2              | A1448033    | 11 | 7.759  | 7.761  | 8.381  | 7.418  | 7.538  | 7.155  | 7.022  | 7.766  | 7.112  | 5.832  | 8.169  | 7.916  | 7.476  | 8.11   | 7.179  | 7.698  | 8.489  | 8.338  | 7.866  | 8.47    | 0.99573   | 0.56442 | 0.00985   | 0.17998 | 0.05634       | 0.10855 | 0.03015 | 0.40842 | 0.03840        | 0.56525  |
| Adamts3     | A disintegrin-like and metallopeptidase (repolysin type) with thrombospondin type 1 motif, 3              | BQ556625    | 5  | 6.559  | 4.92   | 7.814  | 4.943  | 5.026  | 9.607  | 6.006  | 5.04   | 4.654  | 7.077  | 4.807  | 5.244  | 5.077  | 5.34   | 5.466  | 4.426  | 4.646  | 5.093  | 8.229  | 4.163   | 0.29278   | 0.41888 | 0.34415   | 0.25969 | 0.57226       | 0.01356 | 0.15863 | 0.48667 | 0.07072        | -0.78024 |
| Adamts4     | A disintegrin-like and metallopeptidase (repolysin type) with thrombospondin type 1 motif, 4              | BG064671    | 1  | 11.884 | 12.426 | 11.828 | 12.565 | 12.12  | 11.929 | 12.518 | 11.757 | 11.928 | 11.649 | 11.397 | 11.791 | 12.094 | 12.096 | 11.758 | 11.516 | 11.839 | 12.024 | 11.497 | 11.47   | 0.12116   | 0.40883 | 0.16322   | 0.22074 | 0.34797       | 0.01539 | 0.32316 | 0.40996 | 0.00681        | -0.23428 |
| Adamts5     | A disintegrin-like and metallopeptidase (repolysin type) with thrombospondin type 1 motif, 5 (aggreCAN-2) | A1851347    | 16 | 6.771  | 5.469  | 6.585  | 6.407  | 5.249  | 5.022  | 7.086  |        |        |        |        |        |        |        |        |        |        |        |        |         |           |         |           |         |               |         |         |         |                |          |

| Gene Symbol | Name                                                        | Accession # | Ch | P30_C1 | P30_C2 | P30_C3 | P30_C4 | P30_C5 | P70_C1 | P70_C2 | P70_C3 | P70_C4 | P70_C5 | P30_E1 | P30_E2 | P30_E3 | P30_E4 | P30_E5 | P70_E1 | P70_E2 | P70_E3 | P70_E4 | P70_E5  | P30 Cve p | P30 FDR | P70 Cve p | P70 FDR | P30C v P70C p | Age FDR | Cve p   | Cve FDR | r <sup>2</sup> | t        |          |
|-------------|-------------------------------------------------------------|-------------|----|--------|--------|--------|--------|--------|--------|--------|--------|--------|--------|--------|--------|--------|--------|--------|--------|--------|--------|--------|---------|-----------|---------|-----------|---------|---------------|---------|---------|---------|----------------|----------|----------|
| Adcy9       | Adenylylate cyclase 9                                       | A1844659    | 16 | 6.048  | 6.656  | 6.676  | 6.633  | 6.054  | 6.252  | 7.916  | 7.159  | 6.989  | 8.049  | 5.889  | 5.888  | 6.325  | 6.011  | 6.621  | 6.84   | 7.312  | 7.276  | 6.829  | 6.555   | 0.23134   | 0.41167 | 0.41156   | 0.27331 | 0.04396       | 0.15471 | 0.31204 | 0.56312 | 0.02999        | 0.49732  |          |
| Adcyap1     | Adenylylate cyclase activating polypeptide 1                | A1323443    | 17 | 8.233  | 8.676  | 8.64   | 8.532  | 8.704  | 8.826  | 8.281  | 8.303  | 8.591  | 7.992  | 9.432  | 8.587  | 8.745  | 8.999  | 7.709  | 8.462  | 8.377  | 8.123  | 8.704  | 8.18    | 0.65650   | 0.48832 | 0.87205   | 0.36514 | 0.37001       | 0.01505 | 0.75976 | 0.71907 | 0.36268        | -2.13365 |          |
| Adcyap1r1   | Adenylylate cyclase activating polypeptide 1 receptor 1     | A1846590    | 6  | 9.985  | 9.129  | 9.203  | 9.373  | 9.166  | 9.413  | 9.525  | 9.623  | 9.507  | 9.392  | 9.729  | 9.908  | 9.695  | 9.495  | 9.636  |        | 9.403  | 9.767  | 9.204  | 9.642   | 0.09960   | 0.41083 | 0.92300   | 0.37599 | 0.48344       | 0.01396 | 0.11838 | 0.46481 | 0.00290        | -0.15258 |          |
| Adi1        | Adducin 1 (alpha)                                           | BG087409    | 5  | 10.137 | 10.364 | 9.8    | 10.245 | 10.375 | 10.285 | 9.971  | 10.101 | 9.795  | 9.921  | 10.127 | 10.217 | 10.107 | 10.383 | 9.887  | 9.899  | 10.316 | 9.855  | 10.179 | 10.507  | 0.77085   | 0.51353 | 0.38673   | 0.26834 | 0.24281       | 0.01826 | 0.62914 | 0.68475 | 0.07738        | -0.81912 |          |
| Adi2        | Adducin 2 (beta)                                            | A1835996    | 6  | 11.004 | 11.189 | 11.145 | 11.231 | 11.055 |        | 11.101 | 10.644 | 11.13  | 10.797 | 10.959 | 11.432 | 11.152 | 11.071 | 11.309 | 10.899 | 10.788 | 11.011 | 10.774 | 10.8    | 0.54254   | 0.46431 | 0.59984   | 0.31025 | 0.11348       | 0.03864 | 0.09150 | 0.74773 | 0.08786        | -0.87781 |          |
| Adi3        | Adducin 3 (gamma)                                           | A1449373    | 19 | 7.979  | 7.925  | 7.953  | 7.79   | 7.962  | 8.534  | 8.237  | 8.154  | 8.248  | 8.163  | 7.639  | 7.624  | 8.237  | 6.888  | 7.993  | 6.993  | 8.262  | 7.737  | 8.043  | 8.042   | 0.31793   | 0.42263 | 0.08792   | 0.20307 | 0.00208       | 0.55113 | 0.85050 | 0.42331 | 0.01477        | -0.34636 |          |
| Adfp        | Adipose differentiation related protein                     | A1848880    | 4  | 7.937  | 6.52   | 7.572  | 8.438  | 7.501  | 5.174  | 6.15   | 6.802  | 5.668  | 6.365  | 6.623  | 6.55   | 7.443  | 7.165  | 6.939  | 7.496  | 7.79   | 7.103  | 6.114  |         | 0.10630   | 0.41008 | 0.04635   | 0.19220 | 0.00611       | 0.52549 | 0.58848 | 0.67231 | 0.00100        | -0.08949 |          |
| Adh1        | Alcohol dehydrogenase 1 (class I)                           | A1850278    | 3  | 8.501  | 6.59   | 7.246  | 7.125  | 7.421  | 5.358  | 7.846  | 6.334  | 4.999  | 6.602  | 7.139  | 7.492  | 8.1    | 7.529  | 7.032  | 7.316  | 7.313  | 6.849  | 6.997  | 6.726   | 0.82837   | 0.52627 | 0.05981   | 0.19586 | 0.06432       | 0.08927 | 0.09940 | 0.45392 | 0.04464        | 0.61142  |          |
| Adh5        | Alcohol dehydrogenase 5 (class III), chi polypeptide        | BG064803    | 3  | 7.383  | 7.248  | 7.893  | 7.822  | 8.033  | 7.827  | 8.183  | 6.824  | 6.93   | 7.603  | 7.935  | 7.72   | 7.857  | 8.284  | 7.819  | 8.216  | 7.7    | 7.121  | 7.683  | 7.6     | 0.20808   | 0.40975 | 0.46722   | 0.28428 | 0.49970       | 0.01386 | 0.18305 | 0.49968 | 0.01137        | -1.03141 |          |
| Adh7        | Alcohol dehydrogenase 7 (class IV), mu or sigma polypeptide | BQ560659    | 3  | 5.98   | 5.364  | 6.032  | 4.48   | 6.755  | 5.392  | 6.492  | 5.001  | 9.925  | 6.501  | 8.104  | 5.49   | 9.964  | 3.857  | 5.03   | 5.555  | 5.755  | 4.397  | 5.392  | 5.48    | 0.53251   | 0.46228 | 0.17303   | 0.22296 | 0.35045       | 0.01535 | 0.70053 | 0.70454 | 0.01858        | -0.38916 |          |
| Adh1e1      | Alcohol dehydrogenase, iron containing, 1                   | A1846354    | 1  | 7.303  | 7.118  | 7.298  | 7.301  | 7.074  | 8.023  | 8.49   | 7.621  | 6.995  | 6.307  | 7.897  | 6.781  | 6.666  | 7.165  | 7.564  | 7.392  | 6.965  | 7.652  | 7.277  | 6.558   | 0.79478   | 0.51884 | 0.47772   | 0.28632 | 0.41785       | 0.01448 | 0.61475 | 0.68044 | 0.02685        | -0.46983 |          |
| Adi1        | Acireductone dioxygenase 1                                  | BG063576    | 12 | 5.747  | 7.248  | 6.846  | 7.286  | 7.165  | 6.756  | 7.096  | 6.267  | 5.367  | 5.365  | 4.224  | 6.312  | 5.892  | 7.626  | 6.637  | 4.271  | 5.505  | 6.357  | 5.55   | 7.047   | 0.28442   | 0.41773 | 0.48894   | 0.28851 | 0.17006       | 0.02377 | 0.19536 | 0.50611 | 0.18430        | -1.34443 |          |
| Adipor1     | Adiponectin receptor 1                                      | BG065410    | 1  | 9.755  | 8.972  | 8.563  | 8.812  | 9.222  | 8.692  |        | 8.716  | 8.595  | 8.435  | 9.224  | 9.3    | 8.493  | 8.076  | 9.456  |        | 9.209  | 9.923  | 9.134  | 9.276   | 0.65586   | 0.48818 | 0.00685   | 0.17815 | 0.09625       | 0.04881 | 0.26739 | 0.54204 | 0.07236        | -0.78993 |          |
| Adipor2     | Adiponectin receptor 2                                      | A1854179    | 6  | 6.342  | 6.454  | 5.928  | 7.443  | 6.364  | 7.771  | 7.42   | 8.339  | 7.455  | 5.797  | 7.15   | 7.129  | 7.605  | 6.222  | 7.661  | 7.257  | 7.21   | 7.127  | 6.654  | 6.268   | 0.19764   | 0.40906 | 0.01272   | 0.18815 | 0.01824       | 0.37805 | 0.04869 | 0.67110 | 0.03547        | 0.54241  |          |
| Adk         | Adenosine kinase                                            | BG065190    | 14 | 9.059  | 6.89   | 7.539  | 7.697  | 7.033  | 6.696  | 11.341 | 7.652  | 7.477  | 7.372  | 7.539  | 7.484  | 8.132  | 8.115  | 7.757  | 7.963  | 7.323  | 7.062  | 7.811  | 7.741   | 0.70238   | 0.49836 | 0.54803   | 0.30004 | 0.62379       | 0.01342 | 0.68865 | 0.70144 | 0.00603        | -0.22025 |          |
| Adm         | Adrenomedullin                                              | BG063462    | 7  | 7.682  | 7.508  | 7.899  | 6.952  | 7.087  | 7.398  | 6.516  | 6.459  | 6.414  | 6.858  | 7.42   | 7.034  | 7.829  | 8.864  | 7.561  | 7.43   | 7.396  | 6.719  | 6.915  | 6.466   | 0.40108   | 0.43694 | 0.36020   | 0.26297 | 0.02648       | 0.28063 | 0.30389 | 0.55932 | 0.34885        | 0.20706  |          |
| Adnp        | Activity-dependent neuroprotective protein                  | A1847388    | 2  | 3.57   | 5.833  | 3.925  | 4.566  | 4.522  | 5.986  | 6.88   | 5.68   | 5.787  | 4.831  | 3.796  | 5.13   | 5.833  | 5.629  | 5.668  | 5.807  | 4.717  | 4.544  | 5.925  | 4.613   | 0.25268   | 0.41386 | 0.14707   | 0.21708 | 0.02854       | 0.26026 | 0.90898 | 0.75123 | 0.12272        | 0.10578  |          |
| Adnp2       | ADNP homeobox 2                                             | BQ558624    | 18 | 6.213  | 6.89   | 7.395  | 6.194  | 6.883  | 8.5    | 7.363  | 6.923  | 7.337  | 6.209  | 6.059  | 6.848  | 6.063  | 6.198  | 6.233  | 6.576  | 6.888  | 6.362  | 6.85   | 6.644   | 0.14769   | 0.40776 | 0.15578   | 0.21906 | 0.02423       | 0.01828 | 0.42391 | 0.03145 | 0.50967        |          |          |
| Ado         | 2-aminoethanol (cysteamine) dioxygenase                     | BG063126    | 10 | 7.013  | 7.391  | 8.285  | 8.111  | 7.471  |        | 7.435  | 7.298  | 7.949  | 8.142  | 7.9    | 7.714  | 7.316  | 7.855  | 7.597  | 7.81   | 8.101  | 8.123  | 7.909  | 7.707   | 0.93376   | 0.54994 | 0.29891   | 0.25032 | 0.87662       | 0.01333 | 0.44890 | 0.62237 | 0.14951        | 1.18587  |          |
| Adora1      | Adenosine A1 receptor                                       | A1848715    | 1  | 10.508 | 10.613 | 10.2   | 10.436 | 10.146 | 10.251 | 10.107 | 10.346 | 10.266 | 10.036 | 10.796 |        | 10.681 | 10.709 | 10.511 | 10.283 | 10.3   | 10.534 | 10.275 | 10.145  | 0.03721   | 0.42696 | 0.24492   | 0.23894 | 0.12906       | 0.03247 | 0.07589 | 0.43982 | 0.03671        | -0.55218 |          |
| Adora2a     | Adenosine A2a receptor                                      | A18465291   | 10 | 8.914  | 7.788  | 9.132  | 8.937  |        | 9.525  | 9.327  | 9.323  | 9.233  | 9.037  | 9.037  | 8.923  | 8.989  | 9.277  | 8.878  | 8.867  | 9.617  | 9.451  | 8.968  | 9.261   | 0.45403   | 0.46685 | 0.25557   | 0.24123 | 0.00947       | 0.49003 | 0.47743 | 0.63345 | 0.01488        | -0.34757 |          |
| Adora2b     | Adenosine A2b receptor                                      | A1836141    | 11 | 5.02   | 5.748  | 5.924  | 5.158  | 6.149  | 6.594  | 6.48   | 5.983  | 4.616  | 5.909  | 4.907  | 6.35   | 5.129  | 7.234  | 5.414  | 4.853  | 5.65   | 5.732  | 5.672  | 5.375   | 0.30707   | 0.42096 | 0.26923   | 0.24411 | 0.46694       | 0.1407  | 0.13399 | 0.47286 | 0.00707        | -0.23867 |          |
| Adpgk       | ADP-dependent glucokinase                                   | BG065968    | 9  | 8.541  | 6.777  | 8.595  | 7.845  | 7.615  | 7.881  | 7.568  | 8.206  | 7.658  | 8.314  | 7.962  | 8.255  | 7.469  | 8.282  | 7.664  | 7.898  | 8.356  | 7.957  | 7.944  | 7.998   | 0.64356   | 0.48153 | 0.54930   | 0.30029 | 0.02974       | 0.13141 | 0.94131 | 0.43431 | 0.07512        | 0.01413  | -0.38866 |
| Adprh       | ADP-ribosylarginine hydrolase                               | BG064935    | 16 | 7.721  | 8.263  | 8.05   | 7.344  | 8.163  | 7.331  | 7.261  | 7.536  | 7.542  | 7.306  | 7.933  | 7.886  | 7.438  | 9.11   | 7.943  | 8.247  | 8.104  | 8.061  |        | 7.538   | 0.64879   | 0.48666 | 0.00594   | 0.17819 | 0.02060       | 0.34861 | 0.07329 | 0.43820 | 0.30568        | 1.87674  |          |
| Adprh2      | ADP-ribosylhydrolase like 2                                 | A1836109    | 4  | 8.534  | 8.69   | 8.5    | 9.965  | 8.853  |        | 8.239  | 8.381  | 8.85   | 8.559  | 8.277  | 8.129  | 8.843  | 8.276  | 9.002  | 8.197  | 9      | 8.276  | 7.96   |         | 0.16238   | 0.40772 | 0.76219   | 0.34257 | 0.26202       | 0.01752 | 0.40913 | 0.60619 | 0.23761        | 1.57902  |          |
| Adra1b      | Adrenergic receptor, alpha 1b                               | A1838767    | 11 | 7.674  | 6.663  | 7.459  | 6.444  | 7.29   | 7.732  | 6.679  | 6.993  | 7.178  | 6.801  |        | 8.562  | 7.151  | 7.234  | 7.547  | 7.305  | 6.957  | 7.041  | 7.093  | 0.59829 | 0.47396   | 0.40410 | 0.28680   | 0.45905 | 0.01415       | 0.42476 | 0.61265 | 0.02654 | 0.46703        |          |          |
| Adra1d      | Adrenergic receptor, alpha 1d                               | A1839485    | 2  | 6.307  | 6.021  | 6.16   | 6.175  | 7.082  | 7.895  | 6.536  | 6.884  | 5.644  | 5.891  | 6.738  | 6.258  | 5.616  | 6.285  | 5.598  | 6.06   | 6.085  | 5.548  | 6.237  | 6.253   | 0.41149   | 0.43885 | 0.10682   | 0.20767 | 0.62964       | 0.01341 | 0.67972 | 0.43480 | 0.00704        | -0.24152 |          |
| Adra2a      | Adrenergic receptor, alpha 2a                               | A1415673    | 19 | 8.555  | 8.209  | 8.556  | 9.384  | 7.874  | 9.281  | 6.998  | 8.946  | 8.6    | 9.015  | 9.08   | 8.819  | 9.36   | 8.152  | 9.095  | 8.962  | 8.941  | 9.127  | 9.215  | 8.852   | 0.51152   | 0.45809 | 0.66119   | 0.32241 | 0.16321       | 0.02474 | 0.76793 | 0.72140 | 0.14927        | -1.18384 |          |
| Adrb2       | Adrenergic receptor, beta 2                                 | BG065799    | 18 | 6.392  | 6.05   | 6.492  | 6.541  | 6.058  | 6.2    | 6.788  | 7.145  | 6.392  | 5.706  | 7.336  | 6.412  | 6.794  | 6.755  | 6.338  | 6.371  | 6.618  | 6.218  | 6.672  | 6.255   | 0.07590   | 0.41462 | 0.52891   | 0.29631 | 0.83405       | 0.01327 | 0.09350 | 0.45065 | 0.00124        | 0.09951  |          |
| Adrbk1      | Adrenergic receptor kinase, beta 1                          | BG072616    | 19 | 11.449 | 11.645 | 11.874 | 11.767 | 11.891 | 11.416 | 11.641 | 11.479 | 11.596 | 11.152 | 11.812 | 11.532 | 11.884 | 11.291 | 11.84  | 11.764 | 11.656 |        |        | 11.581  | 0.41069   | 0.43871 | 0.02840   | 0.18668 | 0.05098       | 0.12541 | 0.67645 | 0.69817 | 0.00474        | -0.19518 |          |
| Adrbk2      | Adrenergic receptor kinase, beta 2                          | A1851927    | 5  | 10.278 | 10.04  | 9.982  | 10.653 | 10.164 | 9.845  | 10.034 | 10.152 | 9.936  | 10.592 | 10.029 | 10.18  | 10.153 | 10.008 | 10.132 | 9.912  | 9.692  | 9.767  | 9.622  | 9.556   | 0.38569   | 0.43414 | 0.02743   | 0.18636 | 0.52939       | 0.01372 | 0.03858 | 0.41477 | 0.04586        | -0.62011 |          |
| Adrm1       | Adhesion regulating molecule 1                              | BG064004    | 2  | 9.278  | 10.468 | 9.962  | 10.143 | 10.315 | 9.975  | 9.944  | 9.833  | 9.887  | 9.746  | 10.071 | 10.486 | 9.939  | 9.488  | 9.776  | 10.266 | 9.587  | 10.178 | 9.611  | 9.738   | 0.60465   | 0.47721 | 0.99484   | 0.39197 | 0.02727       | 0.27288 | 0.67185 | 0.69692 | 0.26831        | 1.71279  |          |
| Adsl        | Adenylosuccinate lyase                                      | A1327444    | 15 | 9.71   | 9.617  | 9.168  | 9.405  | 9.143  | 9.668  | 9.359  | 9.022  | 9.124  | 9.326  | 9.496  | 9.272  | 8.866  | 9.996  | 8.731  | 8.897  | 9.113  | 9.359  | 8.848  | 9.47    | 0.60646   | 0.47760 | 0.28037   | 0.24644 | 0.72066       | 0.01327 | 0.24747 | 0.53244 | 0.03843        | -0.56546 |          |
| Adss        | Adenylosuccinate synthetase, non muscle                     | BG077498    | 1  |        |        |        |        |        |        |        |        |        |        |        |        |        |        |        |        |        |        |        |         |           |         |           |         |               |         |         |         |                |          |          |

| Gene Symbol | Name                                                           | Accession # | Ch | P30_C1 | P30_C2 | P30_C3 | P30_C4 | P30_C5 | P70_C1 | P70_C2 | P70_C3 | P70_C4 | P70_C5 | P30_E1 | P30_E2 | P30_E3 | P30_E4 | P30_E5 | P70_E1 | P70_E2 | P70_E3 | P70_E4 | P70_E5  | P30 Cve p | P30 FDR | P70 Cve p | P70 FDR | P30C v P70C p | Age FDR | Cve p   | Cve FDR | r <sup>2</sup> | t        |         |
|-------------|----------------------------------------------------------------|-------------|----|--------|--------|--------|--------|--------|--------|--------|--------|--------|--------|--------|--------|--------|--------|--------|--------|--------|--------|--------|---------|-----------|---------|-----------|---------|---------------|---------|---------|---------|----------------|----------|---------|
| Agxt2l2     | Alanine-glyoxylate aminotransferase 2-like 2                   | BG071048    | 11 | 5.618  | 5.655  | 6.646  | 5.783  | 6.728  | 2.251  | 7.069  | 4.181  | 6.635  | 9.43   | 6.7    | 5.48   | 4.823  | 5.845  | 9.398  | 6.754  | 5.772  | 5.524  | 6.066  | 5.552   | 0.68435   | 0.49440 | 0.98746   | 0.39026 | 0.08830       | 0.01335 | 0.79794 | 0.72783 | 0.01937        | -0.39747 |         |
| Ahctf1      | AT hook containing transcription factor 1                      | AH854586    | 1  | 5.881  | 6.96   | 6.559  | 6.732  | 5.724  | 5.528  | 8.306  | 7.158  | 7.331  | 6.932  | 6.725  | 6.707  | 5.178  | 7.957  | 6.733  | 8.809  | 6.524  | 10.673 | 6.814  | 7.14    | 0.45314   | 0.44668 | 0.52466   | 0.29548 | 0.00867       | 0.49860 | 0.39591 | 0.60060 | 0.00002        | 0.01219  |         |
| Ahcy        | S-adenosylhomocysteine hydrolase                               | BG075171    | 2  | 7.129  | 5.943  | 5.146  | 6.98   | 5.935  | 7.207  | 6.821  | 7.025  | 6.911  | 6.863  | 6.974  | 7.414  | 7.746  | 6.198  | 6.467  | 8.869  | 7.573  | 6.708  | 6.532  | 7.501   | 0.15510   | 0.40769 | 0.29393   | 0.24928 | 0.08427       | 0.05932 | 0.08488 | 0.44542 | 0.00264        | -0.14551 |         |
| Ahcy1       | S-adenosylhomocysteine hydrolase-like 1                        | A1842095    | 3  | 7.001  | 6.133  | 9.512  | 6.979  | 7.19   | 6.999  | 7.018  | 6.518  | 6.758  | 6.662  | 7.119  | 6.669  | 6.822  | 7.377  | 7.583  | 7.324  | 6.499  | 7.264  | 6.808  | 7.011   | 0.68517   | 0.49458 | 0.32151   | 0.25503 | 0.34946       | 0.01536 | 0.92494 | 0.75436 | 0.06817        | -0.76500 |         |
| Ahcy2       | S-adenosylhomocysteine hydrolase-like 2                        | BQ552820    | 6  | 7.121  | 5.414  | 6.221  | 4.722  | 5.129  | 8.366  | 14.288 | 11.059 | 5.881  | 5.399  | 5.663  | 6.383  | 5.727  | 7.482  | 6.659  | 6.463  | 6.611  | 6.47   | 7.381  | 6.398   | 0.25748   | 0.41440 | 0.20045   | 0.22913 | 0.09270       | 0.05156 | 0.11131 | 0.60702 | 0.02393        | 0.44284  |         |
| Ahd1        | AT hook, DNA binding motif, containing 1                       | BG069894    | 4  | 7.244  | 7.82   | 7.99   | 8.206  | 6.481  | 7.487  | 8.228  | 7.623  | 7.386  | 7.444  | 7.711  | 7.593  | 9.967  | 7.654  | 8.269  | 7.707  | 7.487  | 9.866  | 8.624  | 8.176   | 0.57293   | 0.47055 | 0.26369   | 0.24295 | 0.25453       | 0.01779 | 0.19924 | 0.50814 | 0.04725        | -0.62989 |         |
| Ahl1        | Abelson helper integration site 1                              | A1429223    | 10 | 5.203  | 4.087  | 7.103  |        | 6.644  | 6.314  | 6.11   | 5.85   | 4.861  | 1.474  | 4.926  | 0.234  | 4.336  | 4.272  | 5.293  | 4.322  | 3.793  | 4.718  | 2.304  | 4.611   | 0.14885   | 0.40774 | 0.35944   | 0.26281 | 0.50215       | 0.01385 | 0.07300 | 0.43801 | 0.03919        | 0.57126  |         |
| Ahnak2      | AHNAK nucleoprotein 2                                          | CK35095     | 12 | 4.675  | 5.477  | 4.253  | 5.307  | 4.735  | 5.858  | 11.789 | 5.536  | 5.891  | 5.074  | 7.161  | 4.382  | 5.883  | 4.807  | 4.479  | 4.288  | 5.266  | 6.044  | 4.387  | 4.585   | 0.45139   | 0.44634 | 0.13928   | 0.21529 | 0.16460       | 0.02454 | 0.26002 | 0.54139 | 0.07781        | 0.82159  |         |
| Ahr         | Aryl-hydrocarbon receptor                                      | A1852710    | 12 | 5.432  | 5.619  | 6.503  | 5.578  | 5.354  | 7.607  | 8.861  | 0.528  | 4.541  | 5.994  | 5.437  | 6.22   | 5.194  | 6.585  | 4.627  | 5.7    | 5.162  | 5.51   | 5.886  | 6.503   | 0.84139   | 0.52916 | 0.87035   | 0.36478 | 0.89896       | 0.01338 | 0.91147 | 0.75172 | 0.06377        | -0.73818 |         |
| Ahsa1       | AHA1, activator of heat shock protein ATPase homolog 1 (yeast) | BG064466    | 12 | 10.156 | 9.497  | 9.535  | 9.572  | 10.299 | 10.098 | 9.849  | 9.5    | 9.852  | 9.75   | 9.635  | 9.333  | 8.122  | 9.425  | 9.474  | 9.803  | 9.704  | 9.961  | 9.832  | 9.554   | 0.09365   | 0.41160 | 0.74945   | 0.34001 | 0.99214       | 0.01371 | 0.09962 | 0.45422 | 0.02291        | 0.43314  |         |
| Ahsa2       | AHA1, activator of heat shock protein ATPase homolog 2 (yeast) | A1852029    | 11 | 9.616  | 10.08  | 9.813  | 9.695  | 10.339 | 10.738 | 9.729  | 10.082 | 10.399 | 9.927  | 9.889  | 9.687  | 10.020 | 10.217 | 9.341  | 10.078 | 9.504  | 9.895  | 8.912  | 9.291   | 0.71042   | 0.50014 | 0.04846   | 0.19280 | 0.26570       | 0.01739 | 0.05377 | 0.42554 | 0.08713        | -0.87385 |         |
| Alda        | Activation-induced cytidine deaminase                          | A151070     | 6  | 7.311  | 7.409  | 6.906  | 7.364  | 7.205  | 7.242  | 6.721  | 7.472  | 8.242  | 5.871  | 7.711  | 7.218  | 6.683  | 7.398  | 6.658  | 7.708  | 7.241  | 8.104  | 8.104  | 0.95168 | 0.55405   | 0.56329 | 0.30304   | 0.75744 | 0.01325       | 0.54456 | 0.65781 | 0.05288 | -0.66833       |          |         |
| Aida        | Axin interactor, dorsalization associated                      | BG070084    | 1  | 8.373  | 8.311  | 8.508  | 8.205  | 8.515  | 8.329  | 8.288  | 8.478  | 8.374  | 8.683  | 8.46   | 8.797  | 8.964  | 7.985  | 8.539  | 8.26   | 8.957  | 8.433  | 8.778  | 8.624   | 0.37531   | 0.43228 | 0.24016   | 0.23791 | 0.61655       | 0.01344 | 0.12560 | 0.46881 | 0.00000        | -0.00010 |         |
| Aifm1       | Apoptosis-inducing factor, mitochondrion-associated 1          | A1426377    | X  | 6.623  | 7.268  | 7.078  | 6.857  | 6.594  | 9.955  | 6.775  | 6.684  | 6.496  | 6.692  | 7.539  |        | 7.535  | 7.041  | 6.87   | 6.951  | 6.627  | 6.575  | 8.043  | 6.978   | 0.12931   | 0.40835 | 0.69860   | 0.32987 | 0.53481       | 0.01370 | 0.94448 | 0.75813 | 0.05647        | 0.69195  |         |
| Aifm2       | Apoptosis-inducing factor, mitochondrion-associated 2          | A1427772    | 10 | 6.653  | 6.667  | 6.965  | 7.261  | 6.15   | 8.3    | 7.22   | 7.05   | 8.046  | 8.468  | 7.133  | 7.246  | 6.298  | 6.731  | 6.482  | 6.464  | 6.164  | 6.993  | 7.149  | 7.436   | 0.88491   | 0.53888 | 0.02961   | 0.18708 | 0.01355       | 0.43711 | 0.11004 | 0.46015 | 0.09343        | 0.90799  |         |
| Aifm3       | Apoptosis-inducing factor, mitochondrion-associated 3          | A1835101    | 16 | 7.091  | 6.987  | 7.031  | 7.389  | 7.903  | 7.303  | 12.681 | 8.278  | 7.793  | 7.075  | 6.344  | 7.579  | 7.153  | 9.062  | 6.68   |        | 7.463  | 7.568  | 7.077  | 7.234   | 0.87249   | 0.53610 | 0.30929   | 0.25249 | 0.25533       | 0.01860 | 0.34672 | 0.57900 | 0.00760        | -0.24746 |         |
| Aig1        | Androgen-induced 1                                             | A1839111    | 10 | 8.887  | 9.331  | 8.946  | 7.377  | 9.883  | 10.293 | 9.685  | 9.406  | 9.231  | 9.103  | 8.779  | 8.916  | 9.156  | 8.755  | 9.373  | 9.306  | 9.502  | 9.341  | 8.821  | 9.459   | 0.21493   | 0.41026 | 0.61670   | 0.31358 | 0.65292       | 0.02336 | 0.22057 | 0.51909 | 0.03945        | -0.57321 |         |
| Aim1        | Absent in melanoma 1                                           | BQ560845    | 10 | 5.423  | 5.386  | 8.044  | 5.174  | 5.138  | 4.585  | 5.919  | 6.583  | 7.176  | 6.529  | 5.896  | 5.459  | 5.273  | 4.894  | 5.084  | 4.312  | 5.628  | 4.945  | 5.553  | 6.087   | 0.40449   | 0.43050 | 0.21794   | 0.23302 | 0.84253       | 0.01328 | 0.11782 | 0.46450 | 0.00040        | -0.05667 |         |
| Aip         | Aryl-hydrocarbon receptor-interacting protein                  | A1838968    | 19 | 7.009  | 6.937  | 6.657  | 6.17   | 6.181  | 7.492  | 7.922  | 8.151  | 7.71   | 7.551  | 7.767  | 7.084  | 6.282  | 5.482  | 6.65   | 6.884  | 7.364  | 6.74   | 6.888  | 6.659   | 0.89210   | 0.54050 | 0.06334   | 0.17840 | 0.00272       | 0.54884 | 0.03496 | 0.47394 | 0.17039        | 1.28183  |         |
| Ak1         | Adenylylate kinase 1                                           | BQ560823    | 2  | 7.806  | 7.875  | 7.269  | 9.313  | 7.637  | 7.362  | 7.783  | 8.314  | 7.193  | 7.599  | 8.13   | 7.611  | 6.512  | 7.183  | 7.459  | 9.124  | 8.491  | 8.178  | 7.693  | 0.20826 | 0.40976   | 0.30968 | 0.25257   | 0.31825 | 0.01596       | 0.86675 | 0.74267 | 0.29426 | 1.82635        |          |         |
| Ak2         | Adenylylate kinase 2                                           | BG076165    | 4  | 7.033  | 7.36   | 6.438  | 7.177  | 8.536  | 9.518  | 7.319  |        | 10.044 | 6.684  | 7.218  | 6.775  | 7.124  | 6.973  | 7.557  | 7.058  | 7.589  | 7.706  | 8.533  | 7.344   | 0.67246   | 0.49179 | 0.11946   | 0.21068 | 0.07477       | 0.01897 | 0.11308 | 0.46185 | 0.12646        | 1.27544  |         |
| Ak20484     | CDNA sequence AK20484                                          | BQ557865    | 18 | 6.276  | 5.347  | 5.729  | 4.543  | 5.34   | 7.85   | 13.794 | 8.591  | 6.837  | 4.148  | 6.022  | 6.642  | 5.492  | 6.455  | 5.32   | 9.964  | 6.05   | 6.083  | 6.935  | 5.676   | 0.28292   | 0.41753 | 0.48097   | 0.28696 | 0.13781       | 0.02990 | 0.61005 | 0.68531 | 0.09734        | -0.92884 |         |
| Ak3         | Adenylylate kinase 3                                           | CK334684    | 19 | 7.985  | 8.131  | 7.975  | 8.603  | 7.971  | 6.865  | 7.492  | 8.259  | 7.788  | 7.917  | 8.099  | 7.742  | 7.564  | 7.386  | 7.937  | 7.737  | 7.841  | 8.096  |        | 8.494   | 0.05862   | 0.41886 | 0.41073   | 0.27315 | 0.11385       | 0.03847 | 0.72623 | 0.71739 | 0.40452        | -0.58123 |         |
| Ak3l1       | Adenylylate kinase 3-like 1                                    | BG069397    | 4  | 6.244  | 6.575  | 7.818  | 7.359  | 7.702  | 4.755  | 6.304  | 8.234  | 6.702  | 4.942  | 6.755  | 7.085  | 6.144  | 6.702  | 6.379  | 6.709  | 6.883  | 7.353  | 6.718  | 0.17248 | 0.40792   | 0.53524 | 0.29754   | 0.34180 | 0.01549       | 0.84369 | 0.73783 | 0.04409 | 0.61029        |          |         |
| Ak7         | Adenylylate kinase 7                                           | BG070721    | 12 | 9.25   | 9.284  | 8.921  | 9.361  | 7.741  | 10.966 | 8.536  | 8.885  | 6.474  | 8.133  | 8.095  | 9.135  | 8.134  | 8.865  | 8.019  | 8.42   | 8.733  | 8.291  | 8.565  | 6.108   | 0.20953   | 0.40985 | 0.52666   | 0.29587 | 0.69999       | 0.01329 | 0.24858 | 0.53298 | 0.05772        | 0.70002  |         |
| Akap1       | A kinase (PRKA) anchor protein 1                               | A1846507    | 11 | 7.437  | 6.415  | 5.653  | 6.782  | 7.665  | 6.421  | 7.033  | 6.465  | 6.569  | 6.603  | 7.209  | 7.154  | 6.759  | 6.511  | 7.457  | 6.416  | 6.84   | 6.85   | 4.949  | 7.189   | 0.57173   | 0.47030 | 0.45236   | 0.28137 | 0.66066       | 0.01334 | 0.38913 | 0.59770 | 0.13723        | -1.12804 |         |
| Akap10      | A kinase (PRKA) anchor protein 10                              | A1449765    | 11 | 7.834  | 7.661  |        | 6.016  | 4.348  | 7.478  | 7.248  | 6.49   | 7.335  | 7.038  | 5.949  | 5.583  | 5.233  | 6.685  | 6.455  | 5.023  | 6.33   | 6.476  | 5.807  | 5.138   | 0.55402   | 0.46666 | 0.00415   | 0.17724 | 0.40846       | 0.01457 | 0.02808 | 0.40679 | 0.00997        | 0.28388  |         |
| Akap11      | A kinase (PRKA) anchor protein 11                              | BG075014    | 14 | 9.562  | 9.278  | 9.509  | 9.412  | 8.611  | 9.329  | 9.089  | 9.217  | 9.232  | 9.301  | 8.813  | 9.194  | 8.94   |        | 8.841  | 9.774  | 9.164  | 9.257  | 9.015  | 9.52    | 0.73182   | 0.50488 | 0.44907   | 0.28072 | 0.42418       | 0.01326 | 0.92196 | 0.75378 | 0.56542        | -3.22626 |         |
| Akap12      | A kinase (PRKA) anchor protein (gravin) 12                     | A1836130    | 10 | 7.34   | 8.149  | 7.547  | 7.806  | 7.865  | 7.744  | 7.815  | 9.264  | 7.736  | 8.349  | 7.745  |        | 8.198  | 5.75   | 7.357  | 7.192  | 8.114  | 8.309  | 8.763  | 8.208   | 0.36420   | 0.43032 | 0.53484   | 0.29746 | 0.88022       | 0.01425 | 0.76395 | 0.72005 | 0.00169        | -0.11636 |         |
| Akap13      | A kinase (PRKA) anchor protein 13                              | BQ553323    | 7  | 5.379  | 6.597  | 5.368  | 4.425  | 5.022  | 6.684  | 6.148  | 6.066  | 7.781  | 6.392  | 5.47   | 5.895  | 6.506  | 5.25   | 5.492  | 5.674  | 4.819  | 5.45   | 5.361  | 5.871   | 0.40927   | 0.43844 | 0.02018   | 0.18391 | 0.01515       | 0.41688 | 0.22883 | 0.52323 | 0.18979        | 1.36891  |         |
| Akap2       | A kinase (PRKA) anchor protein 2                               | BQ560635    | 4  | 5.687  | 5.586  | 5.429  | 6.065  | 6.319  | 6.275  | 6.022  | 7.396  | 6.582  | 6.492  | 6.259  | 5.006  | 6.047  | 5.29   | 4.533  | 6.141  | 6.427  | 2.705  | 5.184  | 5.501   | 0.20544   | 0.40957 | 0.20206   | 0.22909 | 0.78819       | 0.01325 | 0.60642 | 0.42994 | 0.00499        | 0.20036  |         |
| Akap6       | A kinase (PRKA) anchor protein 6                               | A1844422    | 12 | 11.252 | 11.099 | 10.518 | 10.693 | 10.848 | 10.742 | 10.757 | 10.727 | 10.488 | 10.745 | 10.681 | 10.893 | 10.841 | 11.165 | 10.697 | 10.303 | 10.714 | 10.842 | 10.727 | 10.691  | 0.87138   | 0.53585 | 0.73819   | 0.33776 | 0.21850       | 0.01947 | 0.75870 | 0.71882 | 0.12532        | -1.07061 |         |
| Akap8       | A kinase (PRKA) anchor protein 8                               | BG069776    | 17 | 9.865  | 8.316  | 7.285  | 8.891  | 7.901  | 7.049  | 9.152  | 8.839  | 8.175  | 7.923  | 7.854  | 7.458  | 8.504  | 7.734  | 7.666  | 7.972  | 8.111  | 7.018  | 8.815  | 7.236   | 7.143     | 0.49433 | 0.40859   | 0.14623 | 0.21688       | 0.72166 | 0.01326 | 0.15565 | 0.46329        | 0.00103  | 0.03225 |
| Akap8l      | A kinase (PRKA) anchor protein 8                               |             |    |        |        |        |        |        |        |        |        |        |        |        |        |        |        |        |        |        |        |        |         |           |         |           |         |               |         |         |         |                |          |         |

| Gene Symbol | Name                                                                                           | Accession # | Ch | P30_C1 | P30_C2 | P30_C3 | P30_C4 | P30_C5 | P70_C1 | P70_C2 | P70_C3 | P70_C4 | P70_C5 | P30_E1 | P30_E2  | P30_E3 | P30_E4 | P30_E5 | P70_E1 | P70_E2 | P70_E3 | P70_E4 | P70_E5  | P30 Cve p | P30 FDR | P70 Cve p | P70 FDR | P30C v P70C p | Age FDR | Cve p   | Cve FDR | r <sup>2</sup> | t        |         |
|-------------|------------------------------------------------------------------------------------------------|-------------|----|--------|--------|--------|--------|--------|--------|--------|--------|--------|--------|--------|---------|--------|--------|--------|--------|--------|--------|--------|---------|-----------|---------|-----------|---------|---------------|---------|---------|---------|----------------|----------|---------|
| Aldh7a1     | Aldehyde dehydrogenase family 7, member A1                                                     | BG063304    | 18 | 7.886  | 7.743  | 8.101  | 8.631  | 7.44   | 7.643  | 7.747  | 7.972  | 7.811  | 7.037  | 7.819  | 8.02    | 7.999  | 8.148  | 7.96   | 7.823  | 8.12   | 7.815  | 7.552  | 7.967   | 0.89156   | 0.54038 | 0.17626   | 0.22369 | 0.17393       | 0.02327 | 0.31139 | 0.56282 | 0.47483        | -2.68946 |         |
| Aldh9a1     | Aldehyde dehydrogenase 9, subfamily A1                                                         | BG077736    | 1  | 9.621  | 8.743  | 8.841  | 9.18   | 8.699  |        | 9.005  | 9.086  | 8.857  | 9.183  | 9.225  | 9.427   | 9.193  | 8.659  | 8.925  | 8.928  | 9.396  | 9.366  | 8.761  | 9.026   | 0.76013   | 0.51115 | 0.69489   | 0.32913 | 0.94025       | 0.01349 | 0.60935 | 0.67871 | 0.04323        | 0.60119  |         |
| Aldoa       | Aldolase A, fructose-bisphosphate                                                              | A1846609    | 7  | 12.462 | 12.375 | 12.454 | 12.401 | 12.271 | 12.364 | 12.154 | 12.159 | 12.375 | 12.353 | 12.204 | 12.283  | 12.196 | 12.448 | 12.251 | 12.358 | 12.497 | 12.181 | 12.047 | 12.26   | 0.07697   | 0.41440 | 0.89601   | 0.37021 | 0.10719       | 0.04184 | 0.25214 | 0.53471 | 0.00338        | 0.16483  |         |
| Aldob       | Aldolase B, fructose-bisphosphate                                                              | BG067523    | 4  | 9.832  | 10.173 | 10.103 | 10.521 | 10.46  | 10.541 | 10.555 | 10.337 | 9.996  | 10.097 | 10.167 | 10.094  | 10.349 | 9.983  | 10.388 | 10.269 | 10.304 | 9.94   | 10.174 | 10.204  | 0.77047   | 0.51345 | 0.35820   | 0.26256 | 0.79205       | 0.01325 | 0.37275 | 0.59059 | 0.00000        | -0.06061 |         |
| Aldoc       | Aldolase C, fructose-bisphosphate                                                              | BG067158    | 11 | 11.345 | 10.813 | 11.224 | 11.177 | 11.225 | 11.49  | 11.324 | 11.279 | 11.568 | 11.293 | 11.171 | 11.431  | 11.166 | 11.167 | 11.271 | 11.337 | 11.305 | 11.053 | 11.156 | 11.389  | 0.44040   | 0.44426 | 0.13240   | 0.21370 | 0.06110       | 0.09633 | 0.69941 | 0.70425 | 0.08463        | 0.86004  |         |
| Alg1        | Asparagine-linked glycosylation 1 homolog (yeast, beta-1,4-mannosyltransferase)                | BQ558320    | 16 | 5.884  | 5.806  | 6.788  | 5.859  | 6.43   | 5.923  | 4.66   | 5.586  | 5.003  | 6.167  | 5.932  | 6.071   | 5.346  | 5.84   | 4.859  | 5.739  | 5.704  | 5.18   | 5.615  | 5.565   | 0.10430   | 0.41029 | 0.76363   | 0.34286 | 0.07986       | 0.06431 | 0.33793 | 0.57501 | 0.12117        | 1.05025  |         |
| Alg10b      | Asparagine-linked glycosylation 10 homolog B (yeast, alpha-1,2-glycosyltransferase)            | BG071776    | 15 | 7.657  | 7.332  | 7.941  | 6.939  | 6.009  | 8.27   | 7.556  | 7.405  | 7.356  | 5.679  | 7.754  | 7.118   | 5.459  | 8.994  | 6.975  | 7.257  | 7.168  | 8.192  | 7.492  | 7.153   | 0.90219   | 0.54278 | 0.68207   | 0.32657 | 0.88899       | 0.01336 | 0.71711 | 0.70876 | 0.07146        | 0.78466  |         |
| Alg11       | Asparagine-linked glycosylation 11 homolog (yeast, alpha-1,2-mannosyltransferase)              | BQ560731    | 8  | 7.129  | 6.074  | 5.516  | 5.836  | 5.151  | 10.48  | 7.94   | 6.797  | 6.228  | 7.497  | 6.82   | 6.969   | 5.005  | 6.23   | 6.872  | 6.336  | 6.841  | 6.469  | 6.582  | 5.533   | 0.40388   | 0.43745 | 0.09781   | 0.20550 | 0.05128       | 0.12435 | 0.35825 | 0.58417 | 0.21085        | 1.46200  |         |
| Alg12       | Asparagine-linked glycosylation 12 homolog (yeast, alpha-1,6-mannosyltransferase)              | A1852615    | 15 | 7.064  | 6.471  | 6.532  | 6.163  | 6.755  | 4.461  | 6.251  | 6.255  | 5.916  | 7.453  | 6.574  | 6.956   | 6.959  | 7.123  | 8.093  | 7.681  | 7.827  | 6.908  | 6.813  | 7.531   | 0.10294   | 0.41044 | 0.03919   | 0.19010 | 0.32224       | 0.01587 | 0.00666 | 0.38553 | 0.00772        | 0.24941  |         |
| Alg13       | Asparagine-linked glycosylation 13 homolog (S. cerevisiae)                                     | A1840388    | X  | 8.296  | 8.421  | 8.604  | 8.241  | 8.642  | 7.764  | 9.493  | 8.123  | 7.616  | 8.064  | 8.071  | 7.724   | 8.054  | 6.946  | 7.622  | 6.547  | 8.093  | 7.635  | 8.118  | 7.828   | 0.00872   | 0.44812 | 0.23395   | 0.23655 | 0.52369       | 0.01374 | 0.01149 | 0.39111 | 0.09332        | -0.90740 |         |
| Alg14       | Asparagine-linked glycosylation 14 homolog (yeast)                                             | A1854024    | 3  | 6.484  | 7.857  | 7.017  | 7.426  | 7.571  | 7.961  | 7.501  | 7.653  | 6.72   | 7.905  | 7.506  | 6.996   | 7.624  | 6.709  | 8.418  | 8.132  | 8.125  | 7.741  | 7.928  | 7.537   | 0.64792   | 0.48647 | 0.20684   | 0.23056 | 0.42151       | 0.01444 | 0.27158 | 0.54404 | 0.01509        | 0.35007  |         |
| Alg2        | Asparagine-linked glycosylation 2 homolog (yeast, alpha-1,3-mannosyltransferase)               | A1852834    | 4  | 8.737  | 7.789  | 8.638  | 8.059  | 8.643  | 8.912  | 8.519  | 9.647  | 7.961  | 8.801  | 9.014  | 8.27    | 8.576  | 8.449  | 8.216  | 8.729  | 8.766  | 8.313  | 8.298  | 8.569   | 0.59300   | 0.47474 | 0.44794   | 0.28050 | 0.27032       | 0.01724 | 0.79207 | 0.72651 | 0.00207        | 0.12887  |         |
| Alg3        | Asparagine-linked glycosylation 3 homolog (yeast, alpha-1,3-mannosyltransferase)               | CK334497    | 16 | 8.337  | 8.512  | 8.175  | 8.941  | 8.356  | 8.423  | 8.791  | 8.61   | 8.858  | 8.666  | 8.378  |         | 8.127  | 8.053  | 7.891  | 8.528  | 7.95   | 7.998  | 8.158  | 8.19    | 0.08109   | 0.41361 | 0.00404   | 0.17716 | 0.21072       | 0.01995 | 0.00087 | 0.32777 | 0.37667        | 2.19872  |         |
| Alg5        | Asparagine-linked glycosylation 5 homolog (yeast, dolichyl-phosphate beta-glycosyltransferase) | A1448021    | 3  | 8.85   | 9.534  | 8.919  | 9.068  | 9.942  | 8.582  | 8.9    | 8.5    | 8.87   | 8.348  | 8.748  |         | 8.539  | 8.482  | 8.735  | 9.333  | 8.321  | 8.715  | 9.156  | 8.612   | 0.03427   | 0.42839 | 0.40472   | 0.27195 | 0.02851       | 0.26054 | 0.27508 | 0.54571 | 0.42372        | 2.42531  |         |
| Alg6        | Asparagine-linked glycosylation 6 homolog (yeast, alpha-1,3, glycosyltransferase)              | A1451111    | 4  | 8.029  | 7.586  | 6.942  | 8.353  | 7.509  | 8.096  | 8.195  | 7.784  | 7.663  | 9.116  | 7.783  |         | 7.42   | 6.905  | 7.532  |        | 7.449  | 7.722  | 7.872  | 7.88    | 0.41683   | 0.43984 | 0.18980   | 0.22674 | 0.20276       | 0.02050 | 0.14183 | 0.47765 | 0.36139        | 2.12774  |         |
| Alg9        | Asparagine-linked glycosylation 9 homolog (yeast, alpha-1,2-mannosyltransferase)               | BG064755    | 9  | 8.412  | 7.633  | 7.657  | 8.018  | 7.45   | 9.095  | 7.616  | 8.475  | 7.384  | 7.288  | 7.846  | 7.869   | 8.079  | 7.062  | 7.765  | 8.211  | 7.335  | 8.352  | 7.293  | 7.738   | 0.66081   | 0.48926 | 0.66441   | 0.32305 | 0.73332       | 0.01326 | 0.52203 | 0.64992 | 0.19158        | 1.37689  |         |
| Alk         | Anaplastic lymphoma kinase                                                                     | A1838638    | 17 | 5.668  | 6.918  | 6.285  | 7.172  | 7.772  | 7.833  | 6.906  | 4.248  | 6.833  | 5.995  | 6.7    | 6.555   | 6.496  | 4.968  | 7.568  | 6.632  | 6.827  | 6.352  | 5.352  | 5.792   | 0.85936   | 0.53316 | 0.58147   | 0.30662 | 1.00000       | 0.01375 | 0.62031 | 0.71251 | 0.44961        | 2.55638  |         |
| Alkbh1      | AlkB, alkylation repair homolog 1 (E. coli)                                                    | BG069448    | 12 | 5.465  | 5.461  | 6.236  | 5.712  | 5.833  | 4.23   | 6.423  | 6.106  | 5.954  | 6.668  | 5.97   | 6.001   | 6.123  | 5.931  | 6.289  | 3.901  | 6.251  | 5.562  | 6.13   | 5.626   | 0.56203   | 0.46830 | 0.97856   | 0.38823 | 0.61426       | 0.01344 | 0.68603 | 0.70074 | 0.03837        | -0.56502 |         |
| Alkbh2      | AlkB, alkylation repair homolog 2 (E. coli)                                                    | BG070741    | 5  | 5.714  | 8.24   | 6.431  | 5.084  | 5.153  | 12.356 | 5.759  | 6.108  | 5.129  | 6.48   | 6.425  | 5.5     | 6.714  | 6.27   | 7.227  | 6.739  | 9.588  | 8.051  | 6.726  | 6.794   | 0.42084   | 0.44059 | 0.82371   | 0.35511 | 0.48965       | 0.01392 | 0.89155 | 0.74774 | 0.00611        | -0.22175 |         |
| Alkbh3      | AlkB, alkylation repair homolog 3 (E. coli)                                                    | BG072839    | 2  | 8.417  | 8.545  | 8.575  | 8.166  | 8.473  | 7.889  | 8.669  | 8.424  | 8.235  | 8.491  | 9.393  | 8.583   | 8.077  | 8.997  | 8.796  | 8.556  | 8.393  | 9.169  | 8.558  | 8.66    | 0.18514   | 0.40839 | 0.12084   | 0.21100 | 0.55357       | 0.01362 | 0.03260 | 0.40988 | 0.08658        | 0.87082  |         |
| Alkbh5      | AlkB, alkylation repair homolog 5 (E. coli)                                                    | A1846954    | 11 | 9.229  | 9.366  | 4.04   | 6.994  | 6.379  | 6.664  | 6.674  | 6.333  | 4.272  | 4.206  | 3.988  | 3.923   | 4.248  | 4.551  | 4.637  | 3.988  | 4.038  | 0.996  | 0.3762 | 5.814   | 5.05      | 0.08762 | 0.41250   | 0.33026 | 0.25184       | 0.48338 | 0.01396 | 0.03762 | 0.61406        | 0.00048  | 0.06190 |
| Alkbh6      | AlkB, alkylation repair homolog 6 (E. coli)                                                    | A1839550    | 7  | 8.9    | 9.348  | 9.686  | 9.203  | 9.742  | 9.33   | 9.355  | 9.847  | 8.943  | 9.631  | 10.716 | 8.587   | 9.446  | 8.466  | 9.401  | 9.175  | 9.581  | 9.712  | 9.109  | 9.694   | 0.90600   | 0.54364 | 0.98844   | 0.39049 | 0.71935       | 0.01327 | 0.90340 | 0.75012 | 0.00335        | 1.16403  |         |
| Alkbh7      | AlkB, alkylation repair homolog 7 (E. coli)                                                    | A1427610    | 17 | 9.219  | 9.79   | 9.095  | 9.122  | 9.984  | 8.355  | 9.935  | 9.559  | 8.833  | 9.078  | 9.225  | 9.122   | 9.772  | 9.349  | 9.62   | 9.157  | 9.239  | 9.027  | 9.28   | 9.442   | 0.43097   | 0.44249 | 0.19565   | 0.22806 | 0.25196       | 0.01789 | 0.54697 | 0.65864 | 0.26083        | 1.68017  |         |
| Alkbh8      | AlkB, alkylation repair homolog 8 (E. coli)                                                    | BG087583    | 9  | 7.019  | 6.762  | 6.49   | 7.43   | 7.206  | 6.565  | 7.538  | 6.634  | 6.723  | 9.62   | 6.537  | 6.993   | 7.251  | 8.917  | 8.084  | 8.104  | 6.248  | 5.868  | 6.686  | 6.587   | 0.24095   | 0.41260 | 0.31482   | 0.25364 | 0.49041       | 0.01391 | 0.83608 | 0.73620 | 0.35373        | -2.09255 |         |
| Alms1       | Alstrom syndrome 1 homolog (human)                                                             | A1427680    | 6  | 6.023  | 6.426  | 4.17   | 4.198  | 6.409  | 8.492  | 6.522  | 3.263  | 7.294  | 3.206  | 3.546  | 3.611   | 4.361  | 6.617  | 4.621  | 5.745  | 4.912  | 5.596  | 4.437  | 4.407   | 0.20393   | 0.40946 | 0.57885   | 0.30610 | 0.60761       | 0.01346 | 0.26560 | 0.54119 | 0.14082        | -1.14508 |         |
| Alox12      | Arachidonate 12-lipoxygenase                                                                   | BG069982    | 11 | 6.066  | 5.242  | 5.366  | 4.714  | 5.025  | 5.599  | 6.409  | 3.032  | 6.095  | 4.831  | 4.6    | 6.333   | 7.492  | 6.629  | 4.842  | 4.956  | 5.362  | 5.467  | 7.011  | 5.604   | 0.27422   | 0.41640 | 0.39023   | 0.26904 | 0.89287       | 0.01336 | 0.15435 | 0.48439 | 0.28576        | -1.78907 |         |
| Alox12e     | Arachidonate lipoxygenase, epidermal                                                           | BG067951    | 11 | 6.458  | 6.155  | 6.79   | 6.539  | 7.64   | 3.212  | 6.492  | 6.105  | 5.858  | 7.399  | 6.652  | 6.714   | 6.601  | 6.347  | 5.811  | 6.361  | 5.621  | 6.722  | 5.919  | 0.71696 | 0.50159   | 0.46362 | 0.28357   | 0.25997 | 0.01759       | 0.41534 | 0.60877 | 0.33119 | 1.99037        |          |         |
| Alox5       | Arachidonate 5-lipoxygenase                                                                    | A1850497    | 6  | 7.194  | 8.235  | 6.859  | 7.006  | 9.17   | 7.362  | 6.517  | 7.492  | 7.967  | 7.072  | 7.665  | 7.83    | 8.54   | 7.004  | 7.27   | 7.192  | 8.37   | 6.9    | 7.458  | 0.89589 | 0.54136   | 0.79732 | 0.34970   | 0.54692 | 0.01365       | 0.99147 | 0.76684 | 0.19165 | 1.37721        |          |         |
| Alox5ap     | Arachidonate 5-lipoxygenase activating protein                                                 | BG073030    | 5  | 7.411  | 6.405  | 7.221  | 6.277  | 6.704  | 7.595  | 6.653  | 6.679  | 6.395  | 6.108  | 8.135  | 7.991   | 7.634  | 8.819  | 6.339  | 7.674  | 7.637  | 8.304  | 6.099  | 8.669   | 0.06846   | 0.41626 | 0.18190   | 0.22496 | 0.83602       | 0.01327 | 0.01715 | 0.39699 | 0.46873        | 2.65673  |         |
| Alpl        | Alkaline phosphatase, liver/bone/kidney                                                        | A1851320    | 4  | 8.279  | 9.122  | 7.883  | 7.937  | 7.699  | 7.995  | 7.733  | 7.456  | 8.08   | 8.093  | 7.992  | 8.087   | 7.162  | 7.638  | 8.713  | 7.873  | 8.043  | 8.08   | 7.688  | 7.86    | 0.24338   | 0.41285 | 0.89501   | 0.36999 | 0.27587       | 0.01706 | 0.28959 | 0.55258 | 0.04192        | 1.59348  |         |
| Als2        | Amyotrophic lateral sclerosis 2 (juvenile) homolog (human)                                     | A1413853    | 1  | 5.444  | 6.523  | 7.346  | 6.606  | 5.114  | 6.484  | 6.6    | 6.56   | 7.563  | 7.085  | 7.162  |         | 4.556  | 3.6    | 6.517  | 5.17   | 6.478  | 6.728  | 6.165  | 6.203   | 0.41563   | 0.43962 | 0.06723   | 0.19779 | 0.19163       | 0.02140 | 0.13976 | 0.47653 | 0.26316        | 1.69034  |         |
| Als2cl      | ALS2 C-terminal like                                                                           | BQ557691    | 9  | 5.818  | 5.534  | 4.205  | 5.54   | 6.07   | 12.147 | 7.714  | 5.882  | 6.472  | 4.331  | 7.799  | 7.285   | 7.852  | 5.557  | 4.977  | 6.03   | 6.021  | 6.725  | 4.824  | 5.362   | 0.10069   | 0.41070 | 0.29883   | 0.25031 | 0.20661       | 0.02022 | 0.87429 | 0.74423 | 0.00095        | 0.08723  |         |
| Als2cr13    | Amyotrophic lateral sclerosis 2 (juvenile) chromosome region, candidate 13 (human)             | BG069019    | 1  | 6.301  | 6.672  | 8.483  | 6.836  | 6.508  | 6.302  | 6.761  | 7.273  | 7.024  | 5.66   | 7.012  | 6.291</ |        |        |        |        |        |        |        |         |           |         |           |         |               |         |         |         |                |          |         |

| Gene Symbol | Name                                                          | Accession # | Ch | P30_C1 | P30_C2 | P30_C3 | P30_C4 | P30_C5 | P70_C1 | P70_C2 | P70_C3 | P70_C4 | P70_C5 | P30_E1 | P30_E2 | P30_E3 | P30_E4 | P30_E5 | P70_E1 | P70_E2 | P70_E3 | P70_E4 | P70_E5 | P30 Cve p | P30 FDR | P70 Cve p | P70 FDR | P30C v P70C p | Age FDR | Cve p   | Cve FDR | r <sup>2</sup> | t        |          |
|-------------|---------------------------------------------------------------|-------------|----|--------|--------|--------|--------|--------|--------|--------|--------|--------|--------|--------|--------|--------|--------|--------|--------|--------|--------|--------|--------|-----------|---------|-----------|---------|---------------|---------|---------|---------|----------------|----------|----------|
| Ank1        | Ankyrin 1, erythroid                                          | A1425940    | 8  | 6.492  | 6.84   | 6.224  | 6.774  | 6.475  | 6.769  | 6.414  | 6.052  | 6.591  | 8.654  | 6.606  | 6.488  | 6.389  | 6.676  | 6.94   | 6.027  | 6.014  | 6.395  | 6.511  | 6.225  | 0.69740   | 0.49727 | 0.71366   | 0.33287 | 0.92726       | 0.01345 | 0.76752 | 0.72088 | 0.07344        | -0.79627 |          |
| Ank2        | Ankyrin 2, brain                                              | BQ554321    | 3  | 8.672  | 7.688  | 5.644  | 7.122  | 6.86   | 5.518  | 6.327  | 5.898  | 6.029  | 6.392  | 6.562  | 5.341  | 6.173  | 6.164  | 5.983  | 8.028  | 7.047  | 6.977  | 6.718  | 6.259  | 0.06372   | 0.41745 | 0.01864   | 0.18337 | 0.05618       | 0.10900 | 0.82012 | 0.73274 | 0.39242        | -2.27309 |          |
| Ank3        | Ankyrin 3, epithelial                                         | BQ552008    | 10 | 8.943  | 9.313  | 8.878  | 7.993  | 8.695  | 9.365  | 5.082  | 9.039  | 9.809  | 8.86   | 9.541  | 9.106  | 9.439  | 9.197  | 9.15   | 9.148  | 9.443  | 9.169  | 8.514  | 8.687  | 0.05596   | 0.41967 | 0.34170   | 0.25919 | 0.12621       | 0.03343 | 0.44839 | 0.62217 | 0.00211        | 0.13014  |          |
| Ankf1       | Ankyrin repeat and FYVE domain containing 1                   | BG065509    | 11 | 6.265  | 5.951  | 2.975  | 5.443  | 3.928  |        | 5.541  | 6.46   | 3.215  | 5.109  | 8.628  | 6.391  | 5.287  | 6.109  | 5.28   | 5.781  | 5.789  | 5.897  | 6.471  | 5.968  | 0.14306   | 0.40785 | 0.18799   | 0.22633 | 0.86135       | 0.01331 | 0.04376 | 0.41394 | 0.02994        | 0.49691  |          |
| Ankhd1      | Eukaryotic translation initiation factor 4E binding protein 3 | BG068494    | 18 | 4.206  | 5.113  | 5.977  | 4.149  | 5.492  | 6.492  | 6.287  | 10.74  | 5.475  | 7.492  | 5.366  | 5.723  | 5.063  | 5.907  | 6.169  | 5.209  | 4.715  | 3.399  | 8.077  | 9.446  | 0.14535   | 0.40780 | 0.45857   | 0.28258 | 0.04722       | 0.14003 | 0.77563 | 0.72276 | 0.00111        | 0.09425  |          |
| Ank1b1      | Ankyrin repeat and IBR domain containing 1                    | BG065322    | 5  | 4.373  | 5.597  | 4.755  | 6.334  | 5.437  | 6.022  | 4.496  | 7.404  | 5.826  | 5.681  | 5.45   | 6.332  | 5.632  | 5.537  | 5.933  | 4.563  | 6.192  | 5.321  | 5.115  |        | 0.24144   | 0.41265 | 0.36266   | 0.26347 | 0.33821       | 0.01556 | 0.93590 | 0.75648 | 0.00684        | -0.23478 |          |
| Ank1e2      | Ankyrin repeat and LEM domain containing 2                    | CK334620    | 5  | 8.055  | 7.601  | 6.708  | 7.648  | 8.141  | 6.53   | 7.326  | 8.009  | 7.694  | 8.233  | 7.543  | 7.685  | 7.399  | 7.492  | 7.924  | 7.414  | 7.826  | 7.113  | 7.778  | 8.369  | 0.93711   | 0.55070 | 0.70918   | 0.33198 | 0.85863       | 0.01330 | 0.78452 | 0.72480 | 0.24138        | 1.59545  |          |
| Ank2a2      | Ankyrin repeat, family A (RFXANK-like), 2                     | A1450635    | 13 | 11.489 | 11.63  | 11.62  | 11.404 | 11.274 | 11.574 | 11.743 | 11.643 | 11.755 | 11.341 | 11.741 | 11.618 | 11.802 | 11.602 | 11.174 | 11.527 | 11.661 | 11.779 | 11.816 |        | 0.22293   | 0.41092 | 0.47891   | 0.28651 | 0.23370       | 0.01867 | 0.15529 | 0.48489 | 0.06587        | 0.75110  |          |
| Ank1d1      | Ankyrin repeat domain 1 (cardiac muscle)                      | BQ54166     | 19 | 6.907  | 5.808  | 4.885  | 5.407  | 4.059  | 9.43   | 8.015  | 5.937  | 5.452  | 6.322  | 5.518  | 4.989  | 6.555  | 5.217  | 6.454  | 6.387  | 6.375  | 7.322  | 5.753  | 4.821  | 0.17653   | 0.47129 | 0.31873   | 0.25445 | 0.10259       | 0.04453 | 0.61664 | 0.68101 | 0.28063        | -1.76660 |          |
| Ank1d10     | Ankyrin repeat domain 10                                      | A1845902    | 8  | 7.29   | 7.1    | 6.713  | 7.026  | 6.435  | 6.392  | 7.6    | 7.718  | 7.265  | 7.709  | 8.253  | 8.064  | 6.331  | 7.269  | 7.424  | 6.7    | 7.001  | 7.352  | 7.227  | 7.783  |           | 0.04925 | 0.42192   | 0.69940 | 0.33003       | 0.18541 | 0.02199 | 0.22444 | 0.52104        | 0.34031  | -0.20316 |
| Ank1d11     | Ankyrin repeat domain 11                                      | BG078387    | 8  | 6.123  | 6.054  | 5.264  | 4.881  | 5.303  | 5.877  | 6.237  | 5.476  | 5.06   | 5.524  | 7.35   | 4.926  | 6.586  | 6.015  | 5.369  | 10.957 | 6.784  | 4.728  | 7.09   | 6.288  |           | 0.31936 | 0.42286   | 0.18181 | 0.22493       | 0.73476 | 0.01326 | 0.09181 | 0.44964        | 0.20325  | -1.42856 |
| Ank1d12     | Ankyrin repeat domain 12                                      | BQ550963    | 17 | 7.545  | 7.493  | 7.206  | 7.458  | 7.141  | 8.339  | 6.842  | 8.452  | 7.337  | 7.956  | 7.083  | 7.73   | 8.295  | 9.928  | 7.159  | 7.368  | 8.351  | 7.547  | 8.001  | 8.067  |           | 0.23891 | 0.41239   | 0.82377 | 0.35513       | 0.22458 | 0.01913 | 0.23885 | 0.52820        | 0.02783  | -0.47852 |
| Ank1d13a    | Ankyrin repeat domain 13a                                     | BQ64565     | 5  | 9.282  | 9.165  | 8.303  | 8.833  | 8.823  | 8.966  | 9.185  | 8.498  | 9.102  | 8.703  | 8.841  | 8.041  | 8.324  | 8.826  | 8.668  | 9.111  | 8.95   | 9.341  | 9.227  | 8.875  |           | 0.17662 | 0.40809   | 0.17661 | 0.22376       | 0.67815 | 0.01332 | 0.98863 | 0.76633        | 0.00397  | -0.17857 |
| Ank1d13b    | Ankyrin repeat domain 13b                                     | A1842570    | 11 | 11.355 | 11.195 | 11.143 | 11.284 | 10.935 | 10.963 | 11.18  | 10.971 | 11.256 | 10.653 | 11.169 | 11.617 | 11.546 | 10.661 | 12.018 | 10.769 | 10.833 | 10.978 | 10.828 | 11.356 |           | 0.38669 | 0.43432   | 0.80392 | 0.35105       | 0.19964 | 0.02073 | 0.56240 | 0.66385        | 0.42878  | -2.45053 |
| Ank1d13c    | Ankyrin repeat domain 13c                                     | A1846659    | 3  | 6.093  | 6.875  | 6.698  | 6.39   | 6.281  | 6.744  | 7.472  | 6.837  | 7.242  | 7.51   | 6.617  | 7.558  | 6.954  | 8.364  | 7.179  | 6.904  | 6.693  | 6.079  | 7.082  |        | 0.05742   | 0.41922 | 0.05340   | 0.2947  | 0.03412       | 0.21407 | 0.75400 | 0.71771 | 0.01108        | 0.29943  |          |
| Ank1d13d    | Ankyrin repeat domain 13 family, member D                     | A1452108    | 19 | 5.01   | 5.714  | 5.197  | 6.511  | 4.692  | 6.014  | 5.682  | 5.689  | 7.151  | 4.569  | 4.143  | 5.596  | 6.733  | 6.852  | 4.105  | 4.459  | 5.591  | 4.686  | 4.365  | 5.871  |           | 0.93043 | 0.54918   | 0.23272 | 0.19628       | 0.04043 | 0.01405 | 0.75405 | 0.63070        | 0.26248  | 1.68736  |
| Ank1d16     | Ankyrin repeat domain 16                                      | A1427110    | 2  | 6.534  | 7.075  | 7.375  | 7.053  | 7.185  |        | 6.396  | 7.423  | 6.979  | 6.956  | 6.753  | 8.409  | 6.819  | 7.824  | 7.296  | 7.34   | 7.612  | 7.71   | 7.733  | 7.363  |           | 0.30517 | 0.42067   | 0.16595 | 0.22136       | 0.67660 | 0.01332 | 0.07972 | 0.44222        | 0.13168  | 1.10144  |
| Ank1d17     | Ankyrin repeat domain 17                                      | BG069007    | 5  | 7.981  | 7.786  | 7.972  | 8.521  | 8.15   | 8.451  | 8.445  | 8.073  | 8.272  | 8.175  | 8.283  | 8.806  | 8.225  | 7.205  | 8.848  | 7.704  | 8.078  | 8.016  | 7.678  | 8.409  |           | 0.56787 | 0.46950   | 0.09132 | 0.20392       | 0.20129 | 0.02061 | 0.83195 | 0.73531        | 0.00714  | 0.23984  |
| Ank1d22     | Ankyrin repeat domain 22                                      | BG070307    | 19 | 6.731  | 7.205  | 6.299  | 6.996  | 7.033  | 11.426 | 8.474  | 7.809  | 6.409  | 6.496  | 6.409  | 7.377  | 6.456  | 6.324  | 6.571  | 7.392  | 7.418  | 6.765  | 6.606  | 7.229  |           | 0.39047 | 0.43500   | 0.29525 | 0.24956       | 0.20824 | 0.02011 | 0.22701 | 0.52232        | 0.05173  | 0.66063  |
| Ank1d23     | Ankyrin repeat domain 23                                      | A1853437    | 1  | 6.226  | 6.435  | 8.501  | 6.296  | 6.762  | 7.152  | 5.878  | 6.848  | 7.787  | 7.999  | 7.888  | 5.977  | 6.307  | 5.862  | 6.094  | 6.269  | 7.329  | 7.504  | 6.352  | 5.94   |           | 0.52931 | 0.46164   | 0.55574 | 0.30156       | 0.42319 | 0.01442 | 0.97652 | 0.76412        | 0.00674  | -0.24823 |
| Ank1d26     | Ankyrin repeat domain 26                                      | BG081767    | 6  | 5.081  | 6.781  | 6.156  | 10.366 | 6.366  | 2.001  | 4.731  | 5.781  | 6.604  | 5.524  | 6.781  | 5.707  | 5.892  | 4.264  | 5.919  | 4.832  | 5.882  | 5.71   | 5.781  | 7.103  |           | 0.24528 | 0.41705   | 0.31528 | 0.25373       | 0.12964 | 0.03228 | 0.82209 | 0.73317        | 0.13458  | 1.11537  |
| Ank1d27     | Ankyrin repeat domain 27 (VP59 domain)                        | A1834870    | 7  | 4.449  | 3.602  | 5.076  | 8.051  | 5.955  | 5.325  | 6.667  | 6.07   | 5.51   | 5.948  | 5.631  | 5.192  | 6.509  | 4.672  | 5.151  | 4.832  | 0.508  | 3.907  | 5.616  | 3.076  |           | 0.83521 | 0.42378   | 0.51375 | 0.18401       | 0.45958 | 0.01412 | 0.99249 | 0.45005        | 0.02705  | -0.47165 |
| Ank1d28     | Ankyrin repeat domain 28                                      | BQ550700    | 14 | 5.441  | 5.678  | 5.858  | 4.73   | 4.437  | 4.61   | 2.926  | 6.297  | 5.903  | 5.624  | 7.202  | 5.458  | 6.307  | 6.129  | 6.803  | 3.16   | 5.595  | 5.152  | 5.695  | 8.2    |           | 0.02193 | 0.43538   | 0.64026 | 0.31825       | 0.81919 | 0.01432 | 0.13927 | 0.47027        | 0.03416  | 0.53190  |
| Ank1d34a    | Ankyrin repeat domain 34A                                     | A1842530    | 3  | 9.336  | 9.244  | 9.363  | 9.786  | 9.868  | 9.933  | 9.916  | 9.49   | 9.91   | 9.288  | 9.685  | 10.461 | 9.387  | 9.694  | 9.946  | 9.74   | 9.752  | 9.834  | 9.511  |        | 0.41727   | 0.41992 | 0.86360   | 0.36337 | 0.82854       | 0.01327 | 0.39083 | 0.59844 | 0.08208        | -0.84579 |          |
| Ank1d40     | Ankyrin repeat domain 40                                      | A1851015    | 11 | 8.247  | 6.777  | 8.861  | 8.195  | 5.908  | 9.087  | 9.372  | 8.801  | 9.263  | 8.692  | 8.791  | 8.61   | 8.885  | 8.366  | 8.148  | 6.279  | 8.811  | 7.768  | 8.512  | 8.629  |           | 0.22076 | 0.41074   | 0.06066 | 0.19608       | 0.01609 | 0.40483 | 0.22176 | 0.51969        | 0.02255  | -1.4293  |
| Ank1d43     | Ankyrin repeat domain 43                                      | A1837373    | 11 | 7.166  | 7.99   | 7.907  | 8.148  | 7.909  | 8.257  | 7.234  | 8.577  | 8.224  | 8.572  | 8.535  | 8.402  | 7.914  | 6.668  | 7.651  | 7.78   | 7.929  | 8.116  | 8.11   | 8.093  |           | 0.91273 | 0.54516   | 0.53055 | 0.29663       | 0.38149 | 0.01489 | 0.64669 | 0.68987        | 0.02935  | 0.49008  |
| Ank1d46     | Ankyrin repeat domain 46                                      | A1448580    | 15 | 9.671  | 9.972  | 9.85   | 10.202 | 10.213 | 10.574 | 9.997  | 10.149 | 10.294 | 10.295 | 10.254 | 9.839  | 10.193 | 10.438 | 9.807  | 10.274 | 10.272 | 10.104 | 10.331 | 10.044 |           | 0.46039 | 0.44807   | 0.62077 | 0.31419       | 0.08239 | 0.06134 | 0.74912 | 0.71656        | 0.04432  | -1.16159 |
| Ank1d49     | Ankyrin repeat domain 49                                      | BG067374    | 9  | 4      | 4.683  | 5.672  | 5.203  | 4.639  | 6.285  | 3.115  | 6.661  | 6.005  | 7.285  | 5.153  | 4.706  | 4.333  | 5.285  | 5.561  | 4.494  | 5.34   | 4.221  | 5.148  | 3.148  |           | 0.64987 | 0.48859   | 0.12599 | 0.21220       | 0.22000 | 0.01938 | 0.20078 | 0.50895        | 0.02683  | 0.46963  |
| Ank1d50     | Ankyrin repeat domain 50                                      | A1423699    | 3  | 6.028  | 6.568  | 6.733  | 7.503  | 6.912  | 8.451  | 6.087  | 7.321  | 7.352  | 6.954  | 6.669  |        | 7.204  | 5.207  | 7.51   | 6.118  | 7.283  | 6.855  | 6.855  |        |           | 0.85230 | 0.53158   | 0.27632 | 0.24560       | 0.31497 | 0.01603 | 0.63451 | 0.59224        | 0.00389  | -0.17679 |
| Ank1d54     | Ankyrin repeat domain 54                                      | BQ559953    | 15 | 7.041  | 6.022  | 6.129  | 6.179  | 7.004  |        | 7.278  | 8.798  | 7.83   | 6.6    | 6.21   | 5.768  | 6.129  | 7.011  | 6.628  | 7.378  | 5.822  | 9.569  | 6.249  | 5.606  |           | 0.69642 | 0.49705   | 0.47107 | 0.28502       | 0.04795 | 0.13695 | 0.48020 | 0.63450        | 0.04179  | -0.59065 |
| Ank1d57     | Ankyrin repeat domain 57                                      | BQ556943    | 10 | 5.85   | 7.583  | 5.585  | 6.591  | 6.433  | 4.295  | 8.753  | 6.028  | 9.214  | 8.17   | 4.825  | 5.247  | 4.663  | 5.445  | 5.447  | 5.806  | 6.617  | 5.793  | 3.7    | 5.519  |           | 0.30571 | 0.42768   | 0.06184 | 0.19639       | 0.31736 | 0.01606 | 0.00792 | 0.38702        | 0.23859  | 1.58330  |
| Ank1d6      | Ankyrin repeat domain 6                                       | BQ550696    | 4  | 5.948  | 5.371  | 4.732  | 5.192  | 4.646  | 4.322  | 6.714  | 5.365  | 7.781  | 6.112  | 5.907  | 6.589  | 6.113  | 7.684  | 6.387  | 7.209  | 5.907  | 6.875  | 6.941  | 6.004  |           | 0.05064 | 0.42143   | 0.43566 | 0.27809       | 0.45625 | 0.01414 | 0.05789 | 0.42826        | 0.06493  | 0.74532  |
| Anks1       | Ankyrin repeat and SAM domain containing 1                    | BQ556066    | 17 | 6.112  | 6.561  | 5.725  | 5.824  | 8.087  |        | 3.84   | 7.741  | 7.687  | 8.026  | 5.513  | 7.829  | 7.087  | 5.35   | 5.987  | 6.999  | 8      | 5.925  | 7.426  | 6.24   |           | 0.87020 | 0.53558   | 0.92558 | 0.37654       |         |         |         |                |          |          |

| Gene Symbol | Name                                                            | Accession # | Ch | P30_C1 | P30_C2 | P30_C3 | P30_C4 | P30_C5 | P70_C1 | P70_C2 | P70_C3 | P70_C4 | P70_C5 | P30_E1 | P30_E2 | P30_E3 | P30_E4 | P30_E5 | P70_E1 | P70_E2 | P70_E3 | P70_E4 | P70_E5 | P30_CvE p | P30_FDR | P70_CvE p | P70_FDR | P30C v P70C p | Age FDR | CvE p   | CvE FDR | r <sup>2</sup> | t       |
|-------------|-----------------------------------------------------------------|-------------|----|--------|--------|--------|--------|--------|--------|--------|--------|--------|--------|--------|--------|--------|--------|--------|--------|--------|--------|--------|--------|-----------|---------|-----------|---------|---------------|---------|---------|---------|----------------|---------|
| Ap3b1       | Adaptor-related protein complex 3, beta 1 subunit               | BG066191    | 13 | 6.357  | 6.125  | 6.013  |        | 7.379  | 6.221  | 5.005  | 6.416  | 5.345  | 5.585  | 6.337  | 6.276  | 6.845  | 6.12   | 6.879  | 5.986  | 7.751  | 5.822  | 6.063  | 5.576  | 0.94592   | 0.55272 | 0.29531   | 0.24957 | 0.10607       | 0.04247 | 0.31419 | 0.56412 | 0.07086        | 0.78107 |
| Ap3b2       | Adaptor-related protein complex 3, beta 2 subunit               | A1848762    | 7  | 10.506 | 9.994  | 10.273 | 10.393 | 9.905  | 10.301 | 10.763 | 10.357 | 10.33  | 9.985  | 10.271 | 10.125 | 10.682 | 9.368  | 10.217 | 10.17  | 10.087 | 10.108 | 10.141 | 10.486 | 0.74529   | 0.50787 | 0.33128   | 0.25705 | 0.45399       | 0.01416 | 0.40556 | 0.60469 | 0.00566        | 0.21339 |
| Ap3d1       | Adaptor-related protein complex 3, delta 1 subunit              | A1848702    | 10 | 11.278 | 11.008 | 10.812 | 10.981 | 10.537 | 11.386 | 10.808 | 10.953 | 10.715 | 10.926 | 11.182 | 11.06  | 11.019 | 11.242 | 11.082 | 11.343 | 11.129 | 10.926 | 11.083 | 10.94  | 0.17087   | 0.40788 | 0.38559   | 0.26811 | 0.84277       | 0.01328 | 0.08972 | 0.44838 | 0.22586        | 1.52775 |
| Ap3m1       | Adaptor-related protein complex 3, mu 1 subunit                 | A1326801    | 14 | 9.111  | 8.428  | 8.637  | 8.879  | 8.58   | 9.082  | 9.268  | 8.76   | 8.409  | 9.488  | 9.066  | 8.684  | 9.307  | 9.603  | 9.141  |        | 8.735  | 8.893  | 9.441  | 8.994  | 0.05482   | 0.42003 | 0.95642   | 0.38328 | 0.25752       | 0.01768 | 0.15730 | 0.48596 | 0.16018        | 1.23526 |
| Ap3s1       | Adaptor-related protein complex 3, sigma 1 subunit              | BG069828    | 18 | 10.314 | 10.341 | 10.521 | 10.199 | 10.838 | 10.622 | 10.223 | 10.312 | 10.388 | 10.55  | 10.412 | 10.433 | 10.212 | 10.465 | 10.698 | 10.312 | 10.44  | 10.532 | 10.308 | 10.397 | 0.99203   | 0.56353 | 0.80927   | 0.35215 | 0.86435       | 0.01331 | 0.89779 | 0.74900 | 0.05595        | 0.68856 |
| Ap3s2       | Adaptor-related protein complex 3, sigma 2 subunit              | A1837601    | 7  | 9.181  | 9.224  | 8.937  | 8.958  | 9.246  | 8.752  | 8.97   | 8.57   | 8.731  | 8.696  | 8.853  | 8.733  | 9.114  | 9.123  | 8.975  | 8.984  | 9.28   | 8.824  |        | 9.225  | 0.17592   | 0.40803 | 0.02598   | 0.18587 | 0.00440       | 0.53889 | 0.39759 | 0.60132 | 0.05262        | 0.66657 |
| Ap4b1       | Adaptor-related protein complex AP-4, beta 1                    | A1415196    | 3  | 8.634  | 9.081  | 8.741  | 8.657  | 8.449  | 9.021  | 8.692  | 9.172  | 8.975  | 8.932  | 9.105  | 9.199  | 8.813  | 9.745  | 8.719  | 8.707  | 9.1    | 9.178  | 8.731  | 8.831  | 0.08848   | 0.41237 | 0.70368   | 0.33088 | 0.09458       | 0.05007 | 0.17699 | 0.49649 | 0.00447        | 0.18943 |
| Ap4e1       | Adaptor-related protein complex AP-4, epsilon 1                 | BQ555193    | 2  | 7.167  | 6.267  | 7.216  | 5.966  | 5.938  | 8.153  | 6.652  | 6.684  | 6.534  | 6.322  | 6.465  | 7.031  | 6.218  | 5.298  | 6.1    | 7.384  | 6.91   | 6.636  | 5.755  | 6.945  | 0.49108   | 0.45405 | 0.74499   | 0.33912 | 0.43230       | 0.01434 | 0.47195 | 0.63136 | 0.13808        | 1.13210 |
| Ap4m1       | Adaptor-related protein complex AP-4, mu 1                      | BQ554407    | 5  | 4.68   | 5.103  | 4.502  | 4.59   | 3.929  | 2.402  | 0      | 4.809  | 5.828  | 4.392  | 5.055  | 5.118  | 5.325  | 4.679  | 4.691  | 7.432  | 6.046  | 6.531  | 4.049  | 6.487  | 0.10631   | 0.41008 | 0.05642   | 0.19498 | 0.33652       | 0.01559 | 0.02529 | 0.40449 | 0.62818        | 3.67640 |
| Ap4s1       | Adaptor-related protein complex AP-4, sigma 1                   | BG069322    | 12 | 9.784  | 9.836  | 9.699  | 9.706  | 9.443  | 9.578  | 9.859  | 9.697  | 9.752  | 9.799  | 9.559  | 9.736  | 9.004  | 10.041 | 9.616  | 9.888  | 9.952  | 9.39   | 10.291 | 9.768  | 0.58874   | 0.47385 | 0.45039   | 0.28098 | 0.62040       | 0.01343 | 0.93753 | 0.75680 | 0.03777        | 0.56036 |
| Apaf1       | Apoptotic peptidase activating factor 1                         | A1843083    | 10 | 6.515  | 6.589  | 7.071  | 8.216  | 7.454  | 7.768  | 6.762  | 6.548  | 6.907  | 7.095  | 7.763  | 6.683  | 6.947  | 8.515  | 8.15   |        | 6.72   | 6.971  | 6.057  | 7.2    | 0.22452   | 0.44136 | 0.40003   | 0.27895 | 0.66180       | 0.01334 | 0.49741 | 0.64096 | 0.00028        | 0.40708 |
| Apba1       | Amyloid beta (A4) precursor protein-binding, family A, member 1 | A1413988    | 19 | 10.879 | 10.67  | 10.291 | 10.457 | 10.256 | 10.475 | 10.373 | 10.211 | 10.177 | 10.014 | 10.373 | 10.129 | 10.436 | 10.475 | 10.296 | 10.368 | 10.506 | 10.349 | 10.267 | 10.487 | 0.23898   | 0.41240 | 0.15163   | 0.21812 | 0.10455       | 0.04335 | 0.89573 | 0.74859 | 0.00102        | 0.09054 |
| Apba2       | Amyloid beta (A4) precursor protein-binding, family A, member 2 | A1847716    | 7  | 10.466 | 10.829 | 10.379 | 10.942 | 10.227 | 9.857  | 10.551 | 10.236 | 10.359 | 10.442 | 10.36  | 10.275 | 10.293 | 10.611 | 10.663 | 9.783  | 10.438 | 10.698 | 9.936  | 10.393 | 0.44294   | 0.44474 | 0.85400   | 0.36138 | 0.16143       | 0.02502 | 0.54381 | 0.65756 | 0.05312        | 0.66995 |
| Apba3       | Amyloid beta (A4) precursor protein-binding, family A, member 3 | BG064113    | 10 | 9.74   | 9.488  | 10.008 | 9.611  | 9.657  | 10.418 | 9.768  | 9.583  | 9.624  | 9.943  | 9.384  | 9.041  | 7.871  | 8.246  | 6.975  | 9.02   | 9.358  | 9.948  | 10.054 | 9.825  | 0.01264   | 0.44312 | 0.38713   | 0.26842 | 0.36861       | 0.01507 | 0.02288 | 0.40243 | 0.09406        | 0.91136 |
| Apbb1       | Amyloid beta (A4) precursor protein-binding, family B, member 1 | A1839301    | 7  | 6.694  | 4.886  | 6.87   | 5.813  | 4.548  | 9.127  | 6.267  | 10.695 | 6.057  | 3.8    | 5.979  | 4.43   | 5.005  | 5.537  | 4.482  | 4.512  | 5.788  | 5.016  | 4.743  | 4.106  | 0.25754   | 0.41440 | 0.09617   | 0.20510 | 0.30564       | 0.01624 | 0.04093 | 0.41651 | 0.00212        | 0.13040 |
| Apbb2       | Amyloid beta (A4) precursor protein-binding, family B, member 2 | BG067463    | 5  | 8.925  | 8.549  | 8.541  | 7.999  | 8.542  | 8.316  | 8.757  | 7.99   | 7.884  | 7.736  | 8.475  | 8.103  | 8.422  | 8.128  | 8.581  | 8.039  | 8.107  | 8.269  | 8.055  | 8.328  | 0.36452   | 0.43037 | 0.90724   | 0.37260 | 0.14882       | 0.02730 | 0.60968 | 0.67890 | 0.00129        | 0.10167 |
| Apbb3       | Amyloid beta (A4) precursor protein-binding, family B, member 3 | A1844683    | 18 | 9.204  | 9.567  | 9.446  | 9.111  | 9.554  | 9.474  | 9.296  | 9.209  | 9.209  | 11.714 | 9.623  | 9.472  | 9.533  | 9.825  | 9.667  | 9.486  | 9.558  | 9.463  | 9.28   | 9.26   | 0.05081   | 0.42137 | 0.51179   | 0.29297 | 0.46937       | 0.01405 | 0.98130 | 0.76500 | 0.06871        | 0.76824 |
| Apcc        | Adenomatous polyposis coli                                      | BG070122    | 18 | 7.515  | 7.028  | 8.008  | 7.055  | 7.368  | 5.418  | 7.267  | 6.753  | 5.479  | 7.021  | 7.455  | 6.941  | 7.436  | 6.465  | 6.867  | 6.644  | 7.062  | 6.762  | 7.304  | 7.285  | 0.19955   | 0.48018 | 0.09706   | 0.20532 | 0.04764       | 0.13825 | 0.46129 | 0.62724 | 0.24535        | 1.61276 |
| Apcc2       | Adenomatous polyposis coli 2                                    | BQ554859    | 10 | 6.015  | 6.38   | 5.732  | 6.6    | 6.704  |        | 6.917  | 6.96   | 5.952  | 7.344  | 7.117  | 6.985  | 6.544  | 6.687  | 6.371  | 7.6    | 5.959  | 5.555  | 7.569  | 7.142  | 0.08157   | 0.41353 | 0.96025   | 0.38413 | 0.17076       | 0.02367 | 0.39907 | 0.60195 | 0.07061        | 0.77961 |
| Apccd1      | Adenomatous polyposis coli down-regulated 1                     | BG084307    | 18 | 6.761  | 6.967  | 7.257  | 7.322  | 7.798  | 5.629  | 7.54   | 7.921  | 6.475  | 7.351  | 6.849  | 6.983  | 7.56   | 7.188  | 7.263  | 7.622  | 6.664  | 7.167  | 10.709 | 7.107  | 0.79753   | 0.51945 | 0.37320   | 0.26561 | 0.61099       | 0.01345 | 0.39521 | 0.60031 | 0.19509        | 1.39248 |
| Apeh        | Acylpeptide hydrolase                                           | BG073592    | 9  | 7.313  | 7.434  | 8.565  | 7.632  | 6.794  | 6.816  | 7.893  | 7.174  | 7.428  | 7.321  | 7.449  | 6.378  | 7.576  | 6.192  | 6.201  | 6.259  | 7.295  | 7.341  | 7.334  | 7.219  | 0.10018   | 0.41076 | 0.44248   | 0.27943 | 0.53192       | 0.01371 | 0.05639 | 0.42727 | 0.04411        | 0.60756 |
| Apex1       | Apurinic/apyrimidinic endonuclease 1                            | A1848624    | 14 | 10.835 | 10.36  | 10.313 | 10.418 | 10.135 | 10.383 | 10     | 10.417 | 9.995  | 9.83   | 10.585 | 10.207 | 10.515 | 10.677 | 10.558 | 10.373 | 10.21  | 10.26  | 10.497 | 10.873 | 0.51342   | 0.45847 | 0.09225   | 0.20415 | 0.11850       | 0.03640 | 0.08563 | 0.44588 | 0.00005        | 0.02095 |
| Aph1a       | Anterior pharynx defective 1a homolog (C. elegans)              | A1835174    | 3  |        | 7.395  | 6.98   | 6.988  | 6.897  | 7.12   | 7.638  | 7.694  | 8.732  | 7.005  | 7.621  | 7.159  | 6.119  | 6.937  | 6.316  | 7.831  | 7.444  | 7.673  | 5.531  | 7.358  | 0.49660   | 0.45514 | 0.38990   | 0.26897 | 0.15590       | 0.02595 | 0.24033 | 0.52893 | 0.04509        | 0.61461 |
| Aph1b       | Anterior pharynx defective 1b homolog (C. elegans)              | BQ551879    | 9  | 5.993  | 7.082  | 5.233  | 5.458  | 7.246  | 4.847  | 5.646  | 5.97   | 5.818  | 4      | 5.932  | 6.248  | 6.313  | 7.04   | 5.949  | 6.393  | 5.973  | 6.129  | 6.298  | 6.065  | 0.83294   | 0.52728 | 0.04126   | 0.19072 | 0.12562       | 0.03364 | 0.13229 | 0.47249 | 0.02333        | 0.43719 |
| Api5        | Apoptosis inhibitor 5                                           | BG075457    | 2  | 9.833  | 9.082  | 9.448  | 9.164  | 9.411  | 9.888  | 9.773  | 9.585  | 9.394  | 9.5    | 9.725  | 9.73   | 9.69   | 9      | 9.794  | 9.099  | 9.198  | 9.315  | 9.689  | 9.502  | 0.34139   | 0.42641 | 0.09043   | 0.20370 | 0.16973       | 0.02381 | 0.78888 | 0.72579 | 0.30370        | 1.86797 |
| Api6        | APAF1 interacting protein                                       | A1326904    | 2  | 9.207  | 9.804  | 9.748  | 9.604  | 9.165  | 10.237 | 9.765  | 9.147  | 9.645  | 9.565  | 9.325  |        | 9.48   | 9.655  | 10.626 | 8.713  | 8.794  | 9.364  | 9.688  | 9.263  | 0.40338   | 0.43736 | 0.07985   | 0.20104 | 0.47390       | 0.01402 | 0.47249 | 0.63156 | 0.32880        | 1.97962 |
| Apitd1      | Apoptosis-inducing, TAF9-like domain 1                          | BG071555    | 4  | 6.314  | 6.053  | 6.661  | 6.099  | 6.64   | 5.655  | 11.562 | 5.76   | 6.688  | 5.611  | 5.556  | 6.385  | 6.085  | 5.555  | 5.263  | 7.626  | 6.541  | 5.83   | 10.437 | 6.567  | 0.04135   | 0.42507 | 0.81189   | 0.35269 | 0.55901       | 0.01361 | 0.87203 | 0.74376 | 0.32880        | 0.56212 |
| Apin        | Apelin                                                          | A1854772    | X  | 7.105  | 7.575  | 6.614  | 7.573  | 7.2    | 14.697 | 10.934 | 9.829  | 6.13   | 6.376  | 11.722 | 12.009 | 7.459  | 6.741  | 9.727  | 9.465  | 7.307  | 9.946  | 7.006  | 6.519  | 0.06578   | 0.41692 | 0.39790   | 0.27058 | 0.17402       | 0.02326 | 0.72211 | 0.71000 | 0.10421        | 0.96471 |
| Apinr       | Apelin receptor                                                 | BQ551459    | 2  | 5.979  | 6.637  | 6.662  | 6.235  | 5.683  | 7.2    | 4.914  |        | 6.439  | 5.702  | 6.572  | 6.737  | 5.572  | 6.267  | 7.291  | 7.516  | 5.897  | 6.541  | 5.884  | 7.027  | 0.83215   | 0.52711 | 0.37425   | 0.26582 | 0.43532       | 0.01431 | 0.36069 | 0.58527 | 0.17664        | 1.31005 |
| Aplp1       | Amyloid beta (A4) precursor-like protein 1                      | A1838490    | 7  | 8.121  | 8.341  | 7.547  | 8.224  |        |        | 8.5    | 7.485  | 8.153  | 8.273  | 7.974  | 8.383  | 7.944  | 8.587  | 7.664  | 7.921  | 8.104  | 7.646  | 7.618  | 7.7    | 0.83630   | 0.52803 | 0.20607   | 0.23038 | 0.87912       | 0.01334 | 0.45212 | 0.62365 | 0.03056        | 0.50214 |
| Aplp2       | Amyloid beta (A4) precursor-like protein 2                      | BQ552874    | 9  | 5.503  | 5.88   | 5.248  |        | 5.022  | 5.392  |        |        | 6.439  | 5.702  | 6.572  | 6.737  | 5.572  | 6.267  | 7.291  | 7.516  | 5.897  | 6.541  | 5.884  | 7.027  | 0.06334   | 0.41755 | 0.20975   | 0.23121 | 0.16625       | 0.02429 | 0.12099 | 0.46626 | 0.11417        | 1.01541 |
| Apoa1       | Apolipoprotein A-I                                              | A1848203    | 9  | 7.357  | 7.107  | 7.227  | 8.244  | 7.672  | 8.713  | 7.889  | 7.218  | 7.07   | 8.438  | 6.708  | 7.098  | 7.148  | 7.095  | 7.449  | 7.342  | 7.339  | 7.299  | 7.621  | 7.418  | 0.10853   | 0.40986 | 0.19773   | 0.22852 | 0.39430       | 0.01473 | 0.04480 | 0.41934 | 0.26934        | 1.71725 |
| Apoa1bp     | Apolipoprotein A-I binding protein                              | A1850236    | 3  | 10.813 | 10.127 | 10.678 | 10.161 | 10.487 | 10.196 | 10.457 | 10.157 | 9.951  | 10.265 | 10.405 | 10.382 | 10.062 | 10.301 | 10.593 | 10.112 | 10.078 | 10.16  | 10.621 | 10.353 | 0.2       |         |           |         |               |         |         |         |                |         |

| Gene Symbol | Name                                                                                | Accession # | Ch | P30_C1   | P30_C2 | P30_C3 | P30_C4 | P30_C5 | P70_C1 | P70_C2 | P70_C3 | P70_C4 | P70_C5 | P30_E1 | P30_E2 | P30_E3 | P30_E4 | P30_E5 | P70_E1 | P70_E2 | P70_E3 | P70_E4  | P70_E5  | P30 Cve p | P30 FDR | P70 Cve p | P70 FDR | P30C v P70C p | Age FDR | Cve p   | Cve FDR  | r <sup>2</sup> | t        |
|-------------|-------------------------------------------------------------------------------------|-------------|----|----------|--------|--------|--------|--------|--------|--------|--------|--------|--------|--------|--------|--------|--------|--------|--------|--------|--------|---------|---------|-----------|---------|-----------|---------|---------------|---------|---------|----------|----------------|----------|
| Arf1        | ADP-ribosylation factor 1                                                           | A1324265    | 11 | 13.468   | 13.359 | 13.216 | 13.528 | 13.523 | 13.163 | 13.25  | 13.434 | 13.576 | 13.353 | 13.438 | 13.525 | 13.206 | 13.256 | 13.364 | 13.63  | 13.413 | 13.475 | 13.636  | 13.49   | 0.48330   | 0.45253 | 0.07376   | 0.19949 | 0.51326       | 0.01379 | 0.38734 | 0.59694  | 0.06144        | -0.72366 |
| Arf2        | ADP-ribosylation factor 2                                                           | A1839821    | 11 | 5.248    | 5.53   | 5.111  | 6.17   | 4.755  | 8.37   | 6.209  | 5.805  | 5.74   | 5.503  | 5.798  | 4.872  | 6.501  | 6.214  | 6.062  | 5.005  | 5.633  | 4.725  | 4.629   | 6.109   | 0.18809   | 0.40853 | 0.10041   | 0.20613 | 0.13257       | 0.03138 | 0.45977 | 0.62665  | 0.68928        | -4.21267 |
| Arf3        | ADP-ribosylation factor 3                                                           | A1839447    | 15 | 7.547    | 7.737  | 7.352  | 8.161  | 7.572  | 8.41   | 7.94   | 7.24   | 8.153  | 8.391  | 7.514  | 7.396  | 7.598  | 6.562  | 7.45   | 7.783  | 7.384  | 7.787  | 6.819   | 6.618   | 0.15056   | 0.40772 | 0.04940   | 0.19307 | 0.20253       | 0.02052 | 0.40086 | 0.39041  | 0.06758        | -0.76148 |
| Arf4        | ADP-ribosylation factor 4                                                           | BQ557386    | 14 | 5.319    | 6.485  | 5.501  | 6.343  | 4.411  | 5.803  | 7.555  | 7.87   | 6.585  | 5.148  | 5.484  | 6.66   | 9.986  | 5.592  | 6.239  | 5.536  | 6.368  | 5.53   | 6.247   | 6.164   | 0.23011   | 0.41155 | 0.28524   | 0.24747 | 0.16212       | 0.02491 | 0.61412 | 0.68025  | 0.02443        | 0.44759  |
| Arf5        | ADP-ribosylation factor 5                                                           | A1837008    | 6  | 12.271   | 11.853 | 11.833 | 11.933 | 11.855 | 11.718 | 11.793 | 11.811 | 12.258 | 11.966 | 12.18  | 11.726 | 11.674 | 11.92  | 12.262 | 12.016 | 11.744 | 12.238 | 11.689  | 0.98170 | 0.56106   | 0.93819 | 0.37927   | 0.12610 | 0.01324       | 0.92370 | 0.75412 | 0.30622  | -1.87909       |          |
| Arf6        | ADP-ribosylation factor 6                                                           | BQ554751    | 12 | 7.87     | 7.43   | 7.379  | 8.765  | 8.053  | 8.631  | 8.502  | 8.294  | 8.088  | 7.468  | 8.359  | 8.454  | 8.621  | 8.762  | 7.935  | 6.677  | 7.582  | 8.439  | 8.414   | 7.843   | 0.10506   | 0.41021 | 0.32019   | 0.25475 | 0.38575       | 0.01484 | 0.81436 | 0.73148  | 0.00223        | -0.13367 |
| Arfgap1     | ADP-ribosylation factor GTPase activating protein 1                                 | CK335076    | 2  | 6.74     | 6.358  | 5.995  | 5.573  | 5.95   | 8.466  | 7.768  | 6.463  | 6.658  | 6.056  | 6.428  | 6.783  | 6.485  | 7.073  | 6.805  | 6.693  | 6.275  | 5.259  | 6.301   | 0.03320 | 0.42894   | 0.14189 | 0.21589   | 0.08561 | 0.05794       | 0.66998 | 0.69641 | 0.00249  | -0.14124       |          |
| Arfgap2     | ADP-ribosylation factor GTPase activating protein 2                                 | A1845855    | 2  | 7.521    | 8.069  | 8.246  | 7.708  | 7.93   | 7.764  | 7.591  | 7.995  | 7.745  | 8.238  | 8.097  | 8.362  | 8.891  | 8.372  | 8.18   | 7.925  | 8.366  | 8.04   | 7.331   | 8.481   | 0.03286   | 0.42911 | 0.50387   | 0.29143 | 0.87315       | 0.01332 | 0.04791 | 0.42153  | 0.03656        | 0.55096  |
| Arfgap3     | ADP-ribosylation factor GTPase activating protein 3                                 | A1844507    | 15 | 7.442    | 7.544  | 8.31   | 8.322  | 8.23   | 7.097  | 6.538  | 7.124  | 5.59   | 7.248  | 7.533  | 7.833  | 7.852  | 7.303  | 6.818  | 7.449  | 7.402  | 7.322  | 8.16    | 7.726   | 0.10446   | 0.41027 | 0.03178   | 0.18779 | 0.00899       | 0.49548 | 0.51611 | 0.64780  | 0.02378        | -0.44148 |
| Arfgef1     | ADP-ribosylation factor guanine nucleotide-exchange factor 1(brefeldin A-inhibited) | BG074756    | 1  | 4.493    | 4.92   | 5.756  | 5.117  | 2.568  | 6.426  | 7.322  | 5.263  | 5.502  | 4.755  | 7.157  | 6.631  | 4.774  | 4.578  | 9.95   | 0.544  | 5.687  | 4.559  | 5.935   | 4.983   | 0.10328   | 0.41040 | 0.19964   | 0.22895 | 0.10729       | 0.04179 | 0.75694 | 0.71841  | 0.06856        | -0.76737 |
| Arfgef2     | ADP-ribosylation factor guanine nucleotide-exchange factor 2(brefeldin A-inhibited) | A1835478    | 2  | 8.067    | 7.688  | 7.461  | 7.883  | 8.179  | 8.169  | 8.124  | 7.753  | 7.972  | 8.114  | 7.24   | 7.889  | 6.941  | 7.598  | 7.348  | 7.09   | 7.803  | 8.014  | 7.662   | 7.933   | 0.05964   | 0.41857 | 0.10869   | 0.20812 | 0.28733       | 0.01672 | 0.01305 | 0.39276  | 0.01890        | 0.39260  |
| Arfip1      | ADP-ribosylation factor interacting protein 1                                       | BG063868    | 3  | 5.728    | 7.302  | 6.068  | 6.536  | 6.86   | 7.264  | 6.812  | 7.539  | 6.891  | 6.187  | 7.151  | 6.603  | 7.809  | 7.268  | 7.087  | 6.199  | 6.867  | 6.763  | 7.357   | 0.10717 | 0.40999   | 0.78625 | 0.34744   | 0.25781 | 0.01767       | 0.24894 | 0.53316 | 0.00006  | -0.02157       |          |
| Arfip2      | ADP-ribosylation factor interacting protein 2                                       | BQ552910    | 7  | 7.268    | 6.504  | 5.989  | 6.913  | 5.977  | 8.384  | 8.992  | 8.558  | 7.955  | 7.771  | 5.675  | 7.262  | 5.822  | 8.136  | 6.723  | 7.492  | 8.151  | 7.584  | 6.888   | 6.632   | 0.72155   | 0.50260 | 0.02176   | 0.18446 | 0.00066       | 0.64010 | 0.37556 | 0.59182  | 0.00021        | 0.04127  |
| Arfip1      | ADP-ribosylation factor related protein 1                                           | BQ562270    | 2  | 6.988    | 6.044  | 5.044  | 5.976  | 7.044  | 7.629  | 3.322  | 5.07   | 4.83   | 4.866  | 4.732  | 6.237  | 3.903  | 5.08   | 6.476  | 7.472  | 5.771  | 5.602  | 7.132   | 7.303   | 0.16148   | 0.40771 | 0.12908   | 0.21293 | 0.20893       | 0.02006 | 0.72631 | 0.71104  | 0.25579        | -0.65820 |
| Argu1       | Arginine and glutamate rich 1                                                       | BG070267    | 8  | 7.441    | 7.533  | 7.322  | 7.409  | 6.372  | 6.932  | 6.994  | 7.21   | 6.764  | 6.817  | 7.166  | 7.525  | 7.974  | 7.78   | 7.289  | 7.244  | 7.155  | 7.457  | 0.64824 | 0.48654 | 0.02840   | 0.18668 | 0.37773   | 0.01494 | 0.13356       | 0.47415 | 0.00067 | -0.07326 |                |          |
| Argap1      | Rho GTPase activating protein 1                                                     | BQ559263    | 2  | 5.443    | 6.785  | 6.931  | 6.168  | 6.59   | 5.7    | 5.182  | 6.134  | 6.344  | 4.652  | 7.206  | 5.989  | 6.005  | 5.99   | 6.288  | 6.985  | 6.31   | 5.955  | 6.565   | 0.77832 | 0.51519   | 0.07077 | 0.19872   | 0.09319 | 0.05116       | 0.22151 | 0.51956 | 0.29960  | 1.76208        |          |
| Argap11a    | Rho GTPase activating protein 11A                                                   | BQ559744    | 2  | 4.302    | 5.51   | 6.254  | 3.759  | 3.7    | 1.142  | 6.807  | 6.222  | 2.913  | 6.322  | 4.663  | 3.474  | 3.524  | 3.284  | 4.566  | 3.47   | 9.129  | 6.503  | 5.28    | 5.273   | 0.20716   | 0.40969 | 0.33540   | 0.25790 | 0.98506       | 0.01367 | 0.70065 | 0.70457  | 0.00259        | 0.14424  |
| Argap12     | Rho GTPase activating protein 12                                                    | BQ064038    | 18 | 6.456    | 6.055  | 5.765  | 6.781  | 6.315  | 7.152  | 10.268 | 5.982  | 6.823  | 6.551  | 4.689  | 6.76   | 7.103  | 3.569  | 5.71   | 6.482  | 6.339  | 5.703  | 6.022   | 7.267   | 0.60982   | 0.47831 | 0.24858   | 0.23973 | 0.12943       | 0.02075 | 0.21708 | 0.51733  | 0.02008        | 0.40471  |
| Argap15     | Rho GTPase activating protein 15                                                    | A1840874    | 2  | 8.808    | 9.356  | 9.245  | 8.343  | 9.773  | 9.58   | 9.043  | 8.783  | 8.448  | 8.485  | 8.055  | 8.516  | 8.257  | 8.757  | 8.521  | 9.188  | 9.34   | 9.156  | 9.399   | 8.905   | 0.05097   | 0.42131 | 0.18123   | 0.22481 | 0.53793       | 0.01368 | 0.45770 | 0.62584  | 0.01846        | 0.38791  |
| Argap17     | Rho GTPase activating protein 17                                                    | A1842721    | 7  | 6.921    | 7.036  | 6.191  | 6.9    | 7.57   | 5.49   | 7.369  | 5.865  | 6.508  | 7.307  | 6.931  | 7.007  | 7.226  | 6.521  | 6.812  | 7.307  | 7.207  | 6.678  | 6.012   | 7.093   | 0.92490   | 0.54792 | 0.41692   | 0.27438 | 0.33532       | 0.01561 | 0.49209 | 0.63831  | 0.07569        | -0.80937 |
| Argap18     | Rho GTPase activating protein 18                                                    | BG071822    | 10 | 7.792    | 7.192  | 5.762  | 5.541  | 6.269  | 8.389  | 7.849  | 6.836  | 6.668  | 5.307  | 7.565  | 6.45   | 8.755  | 6.108  | 10.044 | 7.033  | 6.432  | 11.709 | 6.492   | 11.112  | 0.16815   | 0.40781 | 0.26467   | 0.24315 | 0.48594       | 0.01394 | 0.73039 | 0.43807  | 0.01363        | 0.32246  |
| Argap19     | Rho GTPase activating protein 19                                                    | A1429204    | 19 | 7.591    | 7.461  | 7.633  | 7.437  | 8.502  | 8.617  | 7.885  | 8.462  | 7.84   | 6.998  | 7.919  | 7.41   | 8.993  | 8.14   | 7.056  | 7.505  | 6.955  | 7.389  | 7.727   | 7.534   | 0.65597   | 0.48821 | 0.14342   | 0.21624 | 0.56730       | 0.01358 | 0.50014 | 0.64197  | 0.00815        | -0.25640 |
| Argap21     | Rho GTPase activating protein 21                                                    | BG077492    | 2  | 5.846    | 6.805  | 6.594  | 6.785  | 6      | 7.359  | 6.791  | 8.623  | 7.078  | 7.371  | 6.542  | 6.681  | 7.184  | 5.682  | 7.736  | 7.165  | 6.446  | 6.656  | 6.999   | 6.675   | 0.39316   | 0.43549 | 0.56418   | 0.30222 | 0.95546       | 0.01355 | 0.31314 | 0.53663  | 0.01744        | -0.37687 |
| Argap25     | Rho GTPase activating protein 25                                                    | BQ562746    | 6  | 6.11     | 6.396  | 7.154  | 8.581  | 6.065  | 8.044  | 7.708  | 6.476  | 6.043  | 9.977  | 5.884  | 5.856  | 6.243  | 6.385  | 5.722  | 6.386  | 6.846  | 8.437  | 7.061   | 6.366   | 0.28530   | 0.41785 | 0.44655   | 0.28023 | 0.10368       | 0.04387 | 0.34641 | 0.57886  | 0.04541        | -0.61867 |
| Argap26     | Rho GTPase activating protein 26                                                    | BG070822    | 18 | 7.601    | 6.73   | 6.883  | 6.554  | 7.037  | 7.045  | 7.363  | 6.997  | 9.239  | 8.161  | 6.99   | 6.054  | 6.992  | 8.184  | 7.47   | 7.264  | 6.544  | 6.567  | 6.647   | 7.174   | 0.69534   | 0.49681 | 0.06860   | 0.19815 | 0.10542       | 0.04284 | 0.19026 | 0.50344  | 0.00544        | -0.78512 |
| Argap27     | Rho GTPase activating protein 27                                                    | A1449514    | 11 | 5.704    | 6.351  | 6.144  | 6.943  | 5.316  | 4.441  | 6.248  | 5.708  | 6.7    | 6.87   | 5.548  | 6.632  | 6.188  | 6.7    | 5.807  | 6.205  | 6.491  | 6.068  | 6.825   | 7.063   | 0.82153   | 0.52476 | 0.29116   | 0.24870 | 0.85442       | 0.03372 | 0.29411 | 0.55472  | 0.00235        | -0.13727 |
| Argap28     | Rho GTPase activating protein 28                                                    | BQ561347    | 17 | 5.295    | 4.256  | 5.845  | 9.931  | 5.524  | 6.845  | 2.891  | 4.214  | 5.017  | 6.693  | 4.331  | 4.925  | 3.302  | 3.939  | 6.639  | 5.632  | 4.932  | 5.566  | 5       | 5.161   | 0.15031   | 0.40772 | 0.82786   | 0.26370 | 0.34300       | 0.01528 | 0.25033 | 0.53382  | 0.01941        | -0.39795 |
| Argap29     | Rho GTPase activating protein 29                                                    | BQ552445    | 3  | 5.291    | 3.722  | 4.814  | 5.781  | 1.874  | 5.907  | 2.548  | 5.892  | 4.999  | 3.968  | 5.543  | 6.868  | 4.629  | 3.971  | 7.127  | 5.393  | 8.254  | 8.629  | 4.398   | 6.68182 | 0.49384   | 0.06557 | 0.19736   | 0.54755 | 0.01365       | 0.07951 | 0.43861 | 0.05374  | -0.67405       |          |
| Argap4      | Rho GTPase activating protein 4                                                     | A1450176    | X  | 6.912    | 8.094  | 6.68   | 6.87   | 6.632  | 12.214 | 9.7    | 8.485  | 6.794  | 6.727  | 6.919  | 6.835  | 6.446  | 7.067  | 7.31   | 6.256  | 7.444  | 7.105  | 6.819   | 6.894   | 0.70945   | 0.49992 | 0.09988   | 0.20600 | 0.13703       | 0.03011 | 0.07381 | 0.45318  | 0.34374        | -0.24700 |
| Argap5      | Rho GTPase activating protein 5                                                     | BQ551551    | 12 | 5.566    | 5.234  | 6.424  | 5.339  | 4.732  | 8.098  | 4.919  | 6.265  | 6.723  | 5.392  | 6.476  | 6.373  | 6.906  | 6.402  | 5.364  | 5.546  | 6.305  | 5.982  | 6.638   | 6.206   | 0.05470   | 0.42007 | 0.81116   | 0.35254 | 0.22207       | 0.01927 | 0.33721 | 0.57469  | 0.05501        | -0.68241 |
| Argap6      | Rho GTPase activating protein 6                                                     | BG070433    | X  | 6.532    | 6.755  | 6.984  | 6.952  | 7.274  | 7.519  | 8.372  | 6.476  | 7.791  | 7.211  | 7.334  | 7.825  | 6.347  | 6.948  | 7.42   | 8.126  | 7.051  | 4.849  | 6.555   | 7.316   | 0.35114   | 0.42805 | 0.95714   | 0.38344 | 0.12713       | 0.03305 | 0.59607 | 0.67470  | 0.45356        | -2.57686 |
| Argap8      | Rho GTPase activating protein 8                                                     | BG066360    | 15 | 7.279    | 7.077  | 7.357  | 6.64   | 7.181  | 6.342  | 4.068  | 7.364  | 7.003  | 6.67   | 7.175  | 7.12   | 7.249  | 7.107  | 7.245  | 7.491  | 8.028  | 7.717  | 7.487   | 7.703   | 0.59091   | 0.47431 | 0.04531   | 0.19190 | 0.20626       | 0.02025 | 0.03725 | 0.41378  | 0.02413        | 0.44474  |
| Argap9      | Rho GTPase activating protein 9                                                     | BG071560    | 10 | 7.073    | 6.494  | 7.964  | 6.673  | 7.021  | 6.476  | 6.209  | 5.588  | 7.506  | 7.845  | 7.044  | 7.318  | 6.999  | 6.929  | 7.887  | 6.781  | 7.072  | 6.975  | 7.287   | 0.62565 | 0.48169   | 0.17602 | 0.22363   | 0.47623 | 0.01400       | 0.15383 | 0.48411 | 0.06012  | -0.71538       |          |
| Argdia      | Rho GDP dissociation inhibitor (GDI) alpha                                          | A1842332    | 11 | 11.423</ |        |        |        |        |        |        |        |        |        |        |        |        |        |        |        |        |        |         |         |           |         |           |         |               |         |         |          |                |          |

| Gene Symbol | Name                                                 | Accession # | Ch | P30_C1 | P30_C2 | P30_C3 | P30_C4 | P30_C5 | P70_C1 | P70_C2 | P70_C3 | P70_C4 | P70_C5 | P30_E1 | P30_E2 | P30_E3 | P30_E4 | P30_E5 | P70_E1 | P70_E2 | P70_E3 | P70_E4 | P70_E5 | P30 Cve p | P30 FDR | P70 Cve p | P70 FDR | P30C v P70C p | Age FDR | Cve p   | Cve FDR | r <sup>2</sup> | t        |         |
|-------------|------------------------------------------------------|-------------|----|--------|--------|--------|--------|--------|--------|--------|--------|--------|--------|--------|--------|--------|--------|--------|--------|--------|--------|--------|--------|-----------|---------|-----------|---------|---------------|---------|---------|---------|----------------|----------|---------|
| Ar12bp      | ADP-ribosylation factor-like 2 binding protein       | BQ560927    | 8  | 6.621  | 6.948  | 7.609  | 6.58   | 7.622  | 7.781  | 8.132  | 7.664  | 7.237  | 6.951  | 7.763  | 7.737  | 7.757  | 6.623  | 7.714  | 6.612  | 7.519  | 6.973  | 7.613  | 8.244  | 0.20463   | 0.40951 | 0.65729   | 0.32163 | 0.16161       | 0.02499 | 0.56107 | 0.66340 | 0.19026        | 1.37102  |         |
| Ar13        | ADP-ribosylation factor-like 3                       | BG070958    | 19 | 9.169  | 9.212  | 8.477  | 9.207  | 8.171  | 9.702  | 9.061  | 9.073  | 9.336  | 8.396  | 8.416  | 9.012  | 8.402  | 9.338  | 8.702  | 8.733  | 9.7    | 8.923  | 8.87   | 8.928  | 0.80274   | 0.52060 | 0.77007   | 0.34416 | 0.40967       | 0.01456 | 0.69498 | 0.70310 | 0.06442        | -0.74221 |         |
| Ar14a       | ADP-ribosylation factor-like 4A                      | A1845557    | 12 | 7.912  | 7.917  | 8.326  | 8.271  | 8.657  | 8.659  | 9.02   | 8.574  | 8.352  | 8.937  | 9.046  | 9.271  | 8.831  | 8.342  | 8.83   | 8.466  | 8.958  | 8.76   | 9.133  | 9.253  | 0.01438   | 0.44134 | 0.29923   | 0.25039 | 0.02921       | 0.25404 | 0.01312 | 0.39284 | 0.00935        | -0.27473 |         |
| Ar14c       | ADP-ribosylation factor-like 4C                      | A1836268    | 1  | 8.692  | 9.049  | 9.047  | 8.891  | 9.077  | 8.791  | 8.717  | 9.252  | 9.034  | 8.637  | 8.698  | 9.027  | 8.476  | 8.238  | 8.618  | 8.601  | 8.964  | 6.018  | 8.133  |        | 0.05223   | 0.42088 | 0.24393   | 0.23873 | 0.28843       | 0.01669 | 0.05787 | 0.42825 | 0.10435        | 0.96542  |         |
| Ar15a       | ADP-ribosylation factor-like 5A                      | A1845424    | 2  | 6.52   | 7.64   | 6.82   | 6.19   | 7.214  | 8.534  | 9.002  | 6.775  | 7.289  | 8.166  | 6.651  | 6.048  | 7.333  | 6.109  | 6.754  | 6.923  | 7.552  | 6.099  | 5.972  | 6.245  | 0.41551   | 0.43960 | 0.02443   | 0.18353 | 0.05526       | 0.11161 | 0.02272 | 0.40229 | 0.10103        | 0.94820  |         |
| Ar15b       | ADP-ribosylation factor-like 5B                      | A1850029    | 2  | 8.261  | 7.501  | 8.076  | 9.062  | 7.129  | 8.328  | 7.625  | 8.284  | 8.03   | 8      | 8.277  | 8.46   | 9.422  | 8.875  | 8.744  | 8.461  | 8.22   | 8.267  | 8.544  | 8.268  | 0.08819   | 0.41241 | 0.04871   | 0.19287 | 0.91798       | 0.01343 | 0.01516 | 0.39496 | 0.07400        | 0.80193  |         |
| Ar15c       | ADP-ribosylation factor-like 5C                      | A1845193    | 11 | 6.775  | 6.691  | 6.985  | 7.3    | 6.87   | 7.381  | 6.6    | 6.795  | 7.661  | 7.043  | 7.794  | 8.13   | 7.29   | 7.441  | 6.96   | 6.571  | 7.049  | 8.183  | 7.669  | 7.383  | 0.03063   | 0.43028 | 0.43424   | 0.27781 | 0.45653       | 0.01414 | 0.03755 | 0.41400 | 0.10010        | -0.94332 |         |
| Ar16        | ADP-ribosylation factor-like 6                       | A1851113    | 16 | 9.084  | 8.852  | 8.221  | 8.511  | 8.495  | 9.221  | 9.105  | 9.883  | 9.145  | 9.198  | 8.776  | 9.252  | 8.514  | 8.718  | 8.514  | 8.981  | 9.461  | 8.556  | 7.255  | 9.466  | 0.57265   | 0.47049 | 0.64386   | 0.31897 | 0.01243       | 0.45171 | 0.93667 | 0.75663 | 0.10171        | -0.29429 |         |
| Ar16ip1     | ADP-ribosylation factor-like 6 interacting protein 1 | BG064400    | 7  | 10.699 | 10.842 | 10.526 | 10.177 | 10.47  | 11.027 | 10.595 | 10.451 | 10.754 | 11.693 | 10.615 | 10.513 | 10.906 | 10.266 | 10.748 | 10.674 | 10.694 | 10.737 | 10.456 | 10.588 | 0.34103   | 0.42635 | 0.25722   | 0.24158 | 0.10223       | 0.04475 | 0.64304 | 0.68882 | 0.03742        | -0.55767 |         |
| Ar16ip2     | ADP-ribosylation factor-like 6 interacting protein 2 | BG063144    | 17 | 8.107  | 7.832  | 8.116  | 7.656  | 7.512  | 8.572  | 9.2    | 8.293  | 7.873  | 8.093  | 9.121  | 7.554  | 7.662  | 6.775  | 7.791  | 7.567  | 8.459  | 8.641  | 8.045  | 8.654  | 0.87612   | 0.53691 | 0.67894   | 0.32595 | 0.06198       | 0.09431 | 0.71775 | 0.70892 | 0.13554        | 1.11999  |         |
| Ar16ip4     | ADP-ribosylation factor-like 6 interacting protein 4 | A1464443    | 5  | 8.571  | 9.058  | 8.609  | 8.667  | 8.384  | 9.182  | 8.553  | 8.939  | 8.892  | 8.716  | 8.441  | 8.831  | 9.405  | 8.72   | 8.838  | 8.52   | 8.64   | 8.556  | 8.33   | 8.638  | 0.35344   | 0.42844 | 0.02911   | 0.18691 | 0.23172       | 0.01877 | 0.60326 | 0.67693 | 0.15686        | -1.21997 |         |
| Ar16ip6     | ADP-ribosylation factor-like 6 interacting protein 6 | BQ551023    | 2  | 7.508  | 7.937  | 8.073  | 9.354  | 8.603  | 9.108  | 9.438  | 8.372  | 8.317  | 8.008  | 8.65   | 7.607  | 8.613  | 7.802  | 8.432  | 8.219  | 7.966  | 8.481  | 8.654  | 7.795  | 0.85157   | 0.53142 | 0.20816   | 0.23085 | 0.41894       | 0.01447 | 0.31196 | 0.56308 | 0.00218        | -0.13215 |         |
| Ar18a       | ADP-ribosylation factor-like 8A                      | A1841455    | 1  | 7.478  | 8.081  | 8.122  | 8.82   | 8.701  | 7.839  | 9.156  | 8.275  | 8.642  | 8.301  | 7.672  | 7.607  | 8.664  | 8.664  | 8.126  | 7.717  | 7.018  | 8.566  | 7.958  | 8.237  | 7.202     | 0.54108 | 0.46402   | 0.11848 | 0.21045       | 0.55275 | 0.01363 | 0.08626 | 0.44627        | 0.01801  | 0.38308 |
| Ar18b       | ADP-ribosylation factor-like 8B                      | BG066365    | 6  | 7.716  | 7.508  | 7.924  | 8.61   | 8.195  | 8.501  | 14.47  | 8.244  | 8.611  | 6.881  | 7.954  | 8.547  | 8.304  | 9.136  | 8.714  | 7.925  | 8.49   | 8.109  | 8.975  | 8.501  | 0.15993   | 0.40770 | 0.49158   | 0.28903 | 0.33411       | 0.01564 | 0.70367 | 0.70535 | 0.18688        | 1.35599  |         |
| Armc1       | Armadillo repeat containing 1                        | BG064084    | 3  | 10.171 | 9.865  | 9.491  | 9.407  | 9.846  | 9.071  | 9.622  | 9.396  | 9.658  | 9.828  | 9.463  | 9.616  | 9.92   | 9.292  | 9.748  | 10.368 | 9.956  | 9.882  | 9.945  | 9.311  | 0.27841   | 0.41693 | 0.03714   | 0.18947 | 0.06980       | 0.07892 | 0.28436 | 0.55011 | 0.11378        | -0.10346 |         |
| Armc10      | Armadillo repeat containing 10                       | BG074934    | 5  | 7.835  | 8.111  | 7.755  | 8.869  | 10.077 | 7.437  | 7.875  | 7.655  | 8.65   | 7.401  | 8.283  | 8.091  | 7.731  | 8.036  | 7.971  | 7.983  | 7.494  | 8.17   | 7.806  |        | 0.21466   | 0.41024 | 0.11833   | 0.21041 | 0.06243       | 0.09333 | 0.67583 | 0.69800 | 0.08840        | 0.88078  |         |
| Armc5       | Armadillo repeat containing 5                        | BG088348    | 7  | 4.585  | 5.396  | 6.989  | 3.383  | 5.585  | 5.957  | 10.313 | 4.284  | 4.888  | 8.807  | 6.725  | 5.541  | 5.401  | 4.231  | 5.022  | 4.466  | 4.943  | 5.585  | 5.276  | 6.748  | 0.79176   | 0.51817 | 0.97089   | 0.38650 | 0.62795       | 0.01341 | 0.91368 | 0.75216 | 0.27164        | -1.72728 |         |
| Armc6       | Armadillo repeat containing 6                        | BG074811    | 8  | 8.905  | 9.457  | 8.593  | 8.847  | 8.763  | 8.506  | 9.189  | 7.872  | 9.024  | 8.876  | 9.522  | 9.647  | 8.706  | 9.422  | 8.808  | 8.797  | 8.776  | 8.708  | 8.735  |        | 0.21141   | 0.40999 | 0.66793   | 0.32375 | 0.41855       | 0.01447 | 0.29547 | 0.55536 | 0.02124        | -0.41664 |         |
| Armc7       | Armadillo repeat containing 7                        | BQ563066    | 11 | 5.706  | 6.697  | 5.207  | 5.209  | 4.488  | 4.087  | 6.316  | 4.576  | 7.257  | 4.987  | 5.848  | 6.257  | 3.994  | 6.48   | 5.29   | 4.734  | 5.804  | 8.802  | 5.855  | 5.353  | 0.84977   | 0.53102 | 0.41487   | 0.27397 | 0.79503       | 0.01325 | 0.38978 | 0.59798 | 0.16173        | -1.24237 |         |
| Armc8       | Armadillo repeat containing 8                        | BQ560756    | 9  | 8.591  | 9.569  | 8.054  | 7.682  | 7.449  | 8.051  | 6.344  | 7.734  | 7.627  | 7.705  | 8.416  | 8.394  | 8.911  | 6.617  | 8.215  | 8.055  | 8.023  | 9.021  | 8.891  | 8.114  | 0.63142   | 0.48292 | 0.04152   | 0.19079 | 0.15644       | 0.02568 | 0.42073 | 0.61700 | 0.31620        | 1.92338  |         |
| Armc9       | Armadillo repeat containing 9                        | BG075027    | 1  | 5.72   | 6.264  | 9.437  | 7.865  | 8.147  | 5.977  | 4.688  | 5.671  | 7.01   | 5.212  | 5.848  | 5.403  | 5.392  | 6.229  | 4.968  | 5.452  | 6.057  | 5.809  | 5.392  | 5.544  | 0.04612   | 0.42309 | 0.88580   | 0.36804 | 0.08045       | 0.06359 | 0.07824 | 0.43942 | 0.06191        | -0.72658 |         |
| Armcx1      | Armadillo repeat containing, X-linked 1              | A1846227    | X  | 10.166 | 10.056 | 9.764  | 10.025 | 9.541  | 9.84   | 9.981  | 9.857  | 9.412  | 9.809  | 9.831  | 10.104 | 10.136 | 9.28   | 9.403  | 9.415  | 9.701  | 10.183 | 9.59   | 9.833  | 0.46850   | 0.44964 | 0.83183   | 0.35678 | 0.40616       | 0.01460 | 0.51304 | 0.62332 | 0.00296        | -0.15417 |         |
| Armcx2      | Armadillo repeat containing, X-linked 2              | BQ555231    | X  | 6.954  | 7.01   | 5.925  | 7.146  | 6.719  | 7.14   | 13.893 | 6.967  | 9.622  | 10.02  | 10.68  | 7.971  | 6.744  | 5.982  | 6.152  | 6.3    | 7.237  | 7.322  | 7.509  |        | 0.67810   | 0.49303 | 0.35518   | 0.30824 | 0.01618       | 0.30633 | 0.55920 | 0.15830 | 1.22659        |          |         |
| Armcx3      | Armadillo repeat containing, X-linked 3              | BG073243    | X  | 9.435  | 9.183  | 9.53   | 9.071  | 9.67   | 9.432  | 9.875  | 9.152  | 9.836  | 9.459  | 9.157  | 9.153  | 9.924  | 9.449  | 9.392  | 9.512  | 9.831  | 9.26   | 9.484  | 9.124  | 0.84045   | 0.52895 | 0.56657   | 0.30369 | 0.35161       | 0.01533 | 0.77616 | 0.72288 | 0.07698        | 0.81683  |         |
| Armcx4      | Armadillo repeat containing, X-linked 4              | BQ554020    | X  | 9.19   | 9.021  | 8.594  | 9.66   | 8.592  | 9.032  | 9.855  | 8.802  | 8.162  | 8.535  | 8.971  | 8.828  | 8.24   | 6.638  | 8.6    | 8.98   | 8.9    | 9.814  | 8.777  |        | 0.44823   | 0.44574 | 0.94669   | 0.38113 | 0.37050       | 0.01504 | 0.48331 | 0.63568 | 0.07392        | -0.56150 |         |
| Armcx6      | Armadillo repeat containing, X-linked 6              | BG075032    | X  | 6.743  | 7.174  | 4.777  | 5.386  | 5.141  | 7.285  | 5.841  | 5.876  | 5.7    | 6.344  | 4.346  | 5.521  | 9.788  | 7.923  | 5.016  | 6.545  | 5.476  | 5.255  | 5.087  | 5.474  | 0.56338   | 0.46858 | 0.13510   | 0.21432 | 0.52727       | 0.01373 | 0.97788 | 0.76437 | 0.24910        | -1.62909 |         |
| Armet       | Arginine-rich, mutated in early stage tumors         | A1838290    | 9  | 10.528 | 9.783  | 10.386 | 6.34   | 10.017 | 10.687 | 10.313 | 10.151 | 10.096 | 10.297 | 10.312 | 9.936  | 10     | 10.868 | 10.33  | 10.337 | 10.121 | 10.138 | 10.076 | 9.885  | 0.38267   | 0.43359 | 0.15514   | 0.21892 | 0.26473       | 0.01743 | 0.93712 | 0.75672 | 0.03461        | 0.53554  |         |
| Arnt        | Aryl hydrocarbon receptor nuclear translocator       | A1451564    | 3  | 5.42   | 5.706  | 6.696  | 6.988  | 5.7    | 8      | 6.339  | 6.433  | 6.135  | 6.282  | 6.718  | 6.089  | 6.713  | 6.538  | 5.888  | 5.456  | 6.126  | 5.263  | 5.545  | 5.541  | 0.11576   | 0.40922 | 0.24746   | 0.23949 | 0.10836       | 0.04121 | 0.79476 | 0.72711 | 0.16245        | 1.24568  |         |
| Arnt2       | Aryl hydrocarbon receptor nuclear translocator 2     | A1844630    | 7  | 10.514 | 10.111 | 10.11  | 10.985 | 10.237 | 10.433 | 10.594 | 10.249 | 10.124 | 10.259 | 10.204 | 10.753 | 9.983  | 10.241 | 10.097 | 10.736 | 10.586 | 10.34  | 10.131 | 10.404 | 0.53970   | 0.46374 | 0.43956   | 0.27886 | 0.75539       | 0.01325 | 0.90936 | 0.75130 | 0.03802        | 0.56230  |         |
| Arnt1       | Aryl hydrocarbon receptor nuclear translocator-like  | BG072020    | 7  | 8.025  | 7.276  | 8.401  | 8.188  | 7.648  | 7.576  | 8.069  | 7.374  | 7.671  | 8.088  | 8.222  | 7.965  | 8.805  | 7.906  | 7.818  | 8.19   | 8.052  | 7.912  | 8.189  | 7.784  | 0.72980   | 0.50443 | 0.11021   | 0.20848 | 0.55150       | 0.01363 | 0.17388 | 0.49484 | 0.01212        | 0.31327  |         |
| Arpc1a      | Actin related protein 2/3 complex, subunit 1A        | A1840836    | 5  | 12.321 | 12.639 | 12.12  | 12.515 | 12.047 | 12.009 | 12.203 | 12.211 | 12.135 | 12.227 | 12.224 | 12.155 | 12.086 | 12.428 | 12.302 | 12.168 | 12.169 | 12.34  | 12.281 | 12.223 | 0.50258   | 0.45632 | 0.18131   | 0.22482 | 0.19535       | 0.02108 | 0.93233 | 0.75580 | 0.06881        | -0.76889 |         |
| Arpc1b      | Actin related protein 2/3 complex, subunit 1B        | BG064389    | 5  | 10.049 | 10.201 | 9.876  | 9.668  | 10.051 | 9.868  | 10.353 | 9.836  | 9.873  | 9.537  | 9.829  | 9.673  | 10.195 | 10.014 | 10.222 | 10.115 | 9.768  | 9.618  | 9.547  | 9.937  | 0.90269   | 0.54289 | 0.57996   | 0.30632 | 0.64818       | 0.01337 | 0.71977 | 0.70942 | 0.02254        | -0.42955 |         |
| Arpc2       | Actin related protein 2/3 complex, subunit 2         | A1835883    | 1  | 11.538 | 11.357 | 11.476 | 11.611 | 11.333 | 11.383 | 11.091 | 11.166 | 11.417 | 11.281 | 11.439 | 11.401 | 11.275 | 11.534 | 11.708 | 11.466 | 11.231 | 11.409 | 11.945 | 11.604 | 0.92756   | 0.54852 | 0.08636   | 0.20269 | 0.04354       |         |         |         |                |          |         |

| Gene Symbol | Name                                                              | Accession # | Ch | P30_C1 | P30_C2 | P30_C3 | P30_C4 | P30_C5 | P70_C1 | P70_C2 | P70_C3 | P70_C4 | P70_C5 | P30_E1 | P30_E2 | P30_E3 | P30_E4 | P30_E5 | P70_E1 | P70_E2 | P70_E3 | P70_E4 | P70_E5  | P30_CvE p | P30_FDR | P70_CvE p | P70_FDR | P30c v P70c p | Age FDR | CvE p   | CvE FDR | r <sup>2</sup> | t        |
|-------------|-------------------------------------------------------------------|-------------|----|--------|--------|--------|--------|--------|--------|--------|--------|--------|--------|--------|--------|--------|--------|--------|--------|--------|--------|--------|---------|-----------|---------|-----------|---------|---------------|---------|---------|---------|----------------|----------|
| Asc3l1      | Activating signal cointegrator 1 complex subunit 3-like 1         | BG075018    | 2  | 5.249  | 6.609  | 5.37   | 6.862  | 5.674  | 5.304  | 6.358  | 5.549  | 6.087  | 5.421  | 6.365  | 5.653  | 5.311  | 5.725  | 6.91   | 6.141  | 6.057  | 6.571  | 5.549  | 5.129   | 0.92916   | 0.54889 | 0.66368   | 0.32291 | 0.60417       | 0.01347 | 0.72387 | 0.71044 | 0.15711        | -1.22114 |
| Asc1        | Achaete-scute complex homolog 1 (Drosophila)                      | A1415258    | 10 | 7.766  | 8.325  | 8.21   | 8.208  | 8.533  | 8.502  | 8.381  | 8.882  | 8.587  | 8.173  | 8.134  | 8.316  | 7.887  | 8.006  | 7.942  | 8.408  | 8.071  | 7.679  | 8.16   | 8.177   | 0.33330   | 0.42508 | 0.04101   | 0.19064 | 0.12223       | 0.03490 | 0.02743 | 0.40626 | 0.09789        | -0.93172 |
| Asc3        | Achaete-scute complex homolog 3 (Drosophila)                      | A1415295    | 7  | 7.066  | 5.618  | 7.453  | 5.333  | 7.433  |        | 10.253 | 8.364  | 6.59   | 5.683  | 5.276  | 6.282  | 6.362  | 7.132  | 5.133  | 6.346  | 5.821  | 5.511  | 6.264  | 5.212   | 0.38398   | 0.43383 | 0.07907   | 0.20085 | 0.30368       | 0.01629 | 0.04607 | 0.42024 | 0.03995        | 0.57696  |
| Asf1a       | ASF1 anti-silencing function 1 homolog A (S. cerevisiae)          | BG066398    | 10 | 8.375  | 8.302  | 8.287  | 10.335 | 8.334  |        | 8.079  | 8.419  | 7.998  | 7.272  | 8.217  | 8.931  | 8.155  | 8.203  | 9.321  | 9.53   | 8.503  | 7.954  | 8.683  | 8.811   | 0.73892   | 0.50646 | 0.07323   | 0.19935 | 0.16280       | 0.02481 | 0.42679 | 0.61348 | 0.01189        | -0.31020 |
| Asgr1       | Asialoglycoprotein receptor 1                                     | A1845829    | 11 | 7.872  | 8.094  | 7.322  | 7.886  | 7.307  | 7.054  | 7.319  | 7.285  | 7.271  | 7.291  | 7.203  | 7.247  | 7.239  | 7.872  | 7.489  | 7.482  | 7.368  | 6.613  | 7.774  | 7.43    | 0.19889   | 0.40914 | 0.62562   | 0.31535 | 0.02482       | 0.29884 | 0.56260 | 0.66305 | 0.13859        | 1.13450  |
| Ash1l       | Ash1 (absent, small, or homeotic)-like (Drosophila)               | A1849495    | 3  | 9.326  | 9.652  | 8.858  | 8.816  | 9.267  | 8.725  | 9.722  | 9.471  | 9.771  | 9.677  | 9.154  | 9.434  | 9.823  | 9.827  | 9.475  | 9.73   | 9.423  | 10.214 | 9.483  | 9.252   | 0.11333   | 0.40942 | 0.58098   | 0.30652 | 0.27858       | 0.01698 | 0.13476 | 0.47382 | 0.12832        | -1.08522 |
| Ash2l       | Ash2 (absent, small, or homeotic)-like (Drosophila)               | BG075470    | 8  | 9.816  | 9.763  | 9.932  | 9.965  | 9.251  | 9.59   | 9.598  | 9.809  | 9.488  | 9.543  | 9.467  | 9.874  | 9.602  | 9.316  | 9.527  | 9.813  | 9.424  | 9.658  | 9.605  | 9.658   | 0.26910   | 0.41576 | 0.76189   | 0.34251 | 0.34736       | 0.01540 | 0.37081 | 0.58974 | 0.00424        | 0.18454  |
| Asl         | Argininosuccinate lyase                                           | A1841550    | 5  | 6.002  | 5.237  | 6.089  | 6.689  | 5.968  | 5.765  | 7.278  | 6.18   | 5.747  | 6.317  | 4.954  | 6.724  | 4.35   | 5.907  | 5.49   | 3.633  | 6.499  | 5.215  | 6.215  | 6.411   | 0.30417   | 0.42053 | 0.30808   | 0.25223 | 0.49233       | 0.01390 | 0.12456 | 0.46823 | 0.02411        | -0.44461 |
| Asna1       | ArS (bacterial) arsenite transporter, ATP-binding, homolog 1      | A1851275    | 8  | 10.785 | 11.091 | 10.736 | 10.846 | 10.547 | 10.634 | 11.94  | 10.799 | 10.422 | 10.892 | 10.152 | 10.993 | 10.852 | 10.998 | 10.876 | 10.579 | 10.733 | 11.054 | 10.86  | 10.485  | 0.88608   | 0.53915 | 0.50809   | 0.29225 | 0.63616       | 0.01339 | 0.49575 | 0.64034 | 0.06623        | 0.75327  |
| Asns        | Asparagine synthetase                                             | A1846372    | 6  | 5.314  | 4.671  | 4.954  | 5.512  | 5.129  | 6.205  | 5.797  | 5.29   | 5.701  | 6.44   | 4.654  | 5.763  | 4.733  | 4.14   | 4.725  | 5.311  | 5.09   | 4.583  | 5.468  | 6.657   | 0.32916   | 0.42442 | 0.27592   | 0.24551 | 0.01441       | 0.42586 | 0.19226 | 0.50449 | 0.06384        | -0.73858 |
| Asnsd1      | Asparagine synthetase domain containing 1                         | BG072322    | 1  | 8.231  | 8.284  | 7.606  | 7.73   | 8.445  | 8.923  | 8.965  | 8.164  | 8.281  | 9.114  | 7.708  | 8.8    | 8.993  | 8.152  | 8.04   | 9.209  | 9.19   | 7.913  | 7.916  | 8.159   | 0.36668   | 0.43075 | 0.56775   | 0.30392 | 0.03839       | 0.18527 | 0.89087 | 0.74761 | 0.02471        | 0.45020  |
| Asph        | Aspartate-beta-hydroxylase                                        | BG070767    | 4  | 8.103  | 8.783  | 8.417  | 8.537  | 7.865  | 7.963  | 8.701  | 8.093  | 8.026  | 7.933  | 8.255  | 7.525  | 7.925  | 8.369  | 8.481  | 9.352  | 9.248  | 8.245  | 8.146  | 8.781   | 0.36056   | 0.42968 | 0.06502   | 0.19722 | 0.38504       | 0.01485 | 0.37155 | 0.59006 | 0.11461        | 1.01764  |
| Asphd2      | Aspartate beta-hydroxylase domain containing 2                    | BQ554973    | 5  | 9.164  | 8.451  | 8.728  |        | 8.966  | 9.328  | 9.246  | 9.183  | 8.725  | 10.154 | 9.297  | 9.364  | 8.737  | 8.717  | 9.495  | 9.457  | 9.428  | 8.849  | 8.691  | 9.123   | 0.24128   | 0.41263 | 0.45539   | 0.28196 | 0.13443       | 0.03083 | 0.95543 | 0.76020 | 0.18016        | 1.32591  |
| Aspm        | Asp (abnormal spindle)-like, microcephaly associated (Drosophila) | BG068146    | 1  | 5.332  | 5.248  | 7.407  | 6.1    | 4.993  | 7.502  | 4.747  | 4.482  | 5.31   | 6.14   | 7.454  | 6.324  | 7.32   | 7.761  | 5.314  | 6.392  | 5.781  | 5.185  | 4.625  | 5.498   | 0.14366   | 0.40783 | 0.82719   | 0.35583 | 0.80387       | 0.01325 | 0.36558 | 0.58743 | 0.00630        | -0.22530 |
| Aspscr1     | Alveolar soft part sarcoma chromosome region, candidate 1 (human) | BG065426    | 11 | 8.156  | 6.927  | 7.322  | 7.533  |        | 8.7631 | 8.541  | 7      | 6.559  | 7.128  | 7.298  | 7.488  | 5.883  | 6.149  | 6.68   | 7.091  | 7.206  | 6.669  | 7.585  | 7.089   | 0.04874   | 0.42210 | 0.52720   | 0.29598 | 0.60983       | 0.01346 | 0.04510 | 0.41955 | 0.23474        | -1.56650 |
| Asrg1       | Asparaginase like 1                                               | BG071211    | 19 | 7.409  | 7.594  | 7.819  | 6.964  | 8.219  | 7.172  | 8.833  | 6.367  | 7.515  | 7.267  | 7.759  | 7.227  | 7.413  | 6.931  | 7.421  | 7.771  | 7.672  | 7.445  | 7.35   | 7.898   | 0.34315   | 0.42671 | 0.55037   | 0.30050 | 0.63088       | 0.01341 | 0.97443 | 0.76374 | 0.15004        | 1.18837  |
| Asr1        | Argininosuccinate synthetase 1                                    | BQ550781    | 2  | 6.038  | 5.918  | 5.585  | 5.2    | 6.255  | 5.737  | 8.807  | 7.252  | 5.61   | 4.807  | 5.848  | 6.907  | 5.684  | 4.585  | 7.096  | 10.209 | 5.879  | 6.214  | 7.704  | 7.406   | 0.77731   | 0.51497 | 0.55504   | 0.30339 | 0.65848       | 0.01335 | 0.69517 | 0.70315 | 0.27177        | 1.72785  |
| Aster1      | Asteroid homolog 1 (Drosophila)                                   | BG071039    | 9  | 7.376  | 6.021  | 9.501  | 7.559  | 4.602  | 10.313 | 3.143  | 5.535  | 4.621  | 5.87   | 5.052  | 6.695  | 6.131  | 5.459  | 6.76   | 5.693  | 4.44   | 7.527  | 6.714  | 8.163   | 0.29495   | 0.41919 | 0.66771   | 0.32371 | 0.46494       | 0.01408 | 0.81332 | 0.73125 | 0.05261        | 0.66649  |
| Astl        | Astacin-like metalloendopeptidase (M12 family)                    | BG067812    | 2  | 4.972  | 5.165  | 7.807  | 4.72   | 7.737  | 2.263  | 5.524  | 4.613  | 4.954  | 5.25   | 6.534  | 6.531  | 6.613  | 3.739  | 4.403  | 5.2    | 6.507  | 4.796  | 5.98   | 6.227   | 0.97144   | 0.55865 | 0.10450   | 0.29330 | 0.12409       | 0.04920 | 0.29330 | 0.55433 | 0.09392        | -0.91061 |
| Asx1        | Additional sex combs like 1 (Drosophila)                          | A1415661    | 2  | 6.682  | 6.482  | 6.715  | 5.538  | 6.717  | 5.999  | 7.238  | 7.167  | 7.903  | 6.87   | 7.444  | 7.546  | 6.297  | 7.324  | 6.916  | 6.938  | 7.49   | 6.904  | 7.009  | 7.219   | 0.07491   | 0.41482 | 0.82118   | 0.35460 | 0.22815       | 0.01894 | 0.18566 | 0.50104 | 0.06896        | 0.76978  |
| Asx2        | Additional sex combs like 2 (Drosophila)                          | BQ560607    | 12 | 6.447  | 5.667  | 6.925  | 6.103  | 5.175  | 6.34   | 6.801  | 7.032  | 6.655  | 6.267  | 6.375  | 4.67   | 4.962  | 6.308  | 6.902  | 7.017  | 5.986  | 6.219  | 9.678  | 8.234   | 0.78682   | 0.51708 | 0.28246   | 0.24688 | 0.08534       | 0.05822 | 0.34314 | 0.57738 | 0.02371        | 0.17250  |
| Asx3        | Additional sex combs like 3 (Drosophila)                          | BQ551286    | 18 | 6.641  | 6.473  | 5.648  | 6.931  | 6.747  | 6.022  | 5.251  | 5.776  | 6.97   | 5.981  | 7.022  | 7.112  | 6.278  | 7.183  | 6.437  | 6.677  | 6.553  | 6.891  |        | 5.924   | 0.30524   | 0.42068 | 0.20393   | 0.22991 | 0.20853       | 0.02009 | 0.08735 | 0.44694 | 0.18812        | -1.36149 |
| Asz1        | Ankyrin repeat, SAM and basic leucine zipper domain containing 1  | CK355001    | 6  | 9.602  | 6.193  | 5.838  | 6.187  | 5.977  | 10.125 | 14.364 | 8.881  | 6.011  | 4.655  | 10     | 5.392  | 4.01   | 4.87   | 6.466  | 5.323  | 10.022 | 6.08   | 7.129  | 6.031   | 0.64109   | 0.48500 | 0.34639   | 0.26015 | 0.29858       | 0.01642 | 0.28352 | 0.54971 | 0.01031        | 0.28871  |
| Atad1       | ATPase family, AAA domain containing 1                            | A1853596    | 19 | 9.809  | 9.481  | 9.84   | 9.813  |        | 10.785 | 9.871  | 9.033  | 10.279 | 9.317  | 9.616  | 10.017 | 10.369 | 9.879  | 9.86   | 9.655  | 9.529  | 9.781  | 9.773  | 0.64482 | 0.48581   | 0.92746 | 0.37695   | 0.98250 | 0.01366       | 0.97175 | 0.72643 | 0.42803 | -2.44679       |          |
| Atad2       | ATPase family, AAA domain containing 2                            | BQ551484    | 15 | 4.853  | 4.898  | 5.854  | 5.077  | 4.87   | 4.376  | 10.536 | 5.381  | 5.684  | 4.059  | 5.359  | 5.666  | 5.814  | 5.039  | 4.915  | 4.777  | 5.589  | 6.464  | 5.086  | 0.36297 | 0.43010   | 0.43344 | 0.27765   | 0.47165 | 0.01403       | 0.54701 | 0.65866 | 0.00545 | -0.20937       |          |
| Atad2b      | ATPase family, AAA domain containing 2B                           | BG066445    | 12 |        | 6.869  | 3.703  | 5.129  | 4.694  | 6.69   | 10.738 | 6.681  | 5.898  | 3.761  | 5.431  | 4.793  | 3.668  | 5.931  | 5.17   | 5.609  | 5.083  | 6.016  | 6.948  | 5.732   | 0.89382   | 0.54089 | 0.63991   | 0.31818 | 0.61771       | 0.01344 | 0.86792 | 0.74292 | 0.52023        | -2.94530 |
| Atad3a      | ATPase family, AAA domain containing 3A                           | A1838481    | 4  | 9.068  | 9.044  | 8.508  | 10.053 | 9.645  |        | 8.795  | 8.556  | 8.649  | 8.454  | 8.798  | 9.309  | 8.864  | 8.73   | 9.043  | 9.145  | 9.307  | 9.202  | 8.825  | 8.723   | 0.30394   | 0.42049 | 0.02038   | 0.18398 | 0.07373       | 0.07260 | 0.91787 | 0.75298 | 0.05103        | -0.65588 |
| Atad4       | ATPase family, AAA domain containing 4                            | BG073271    | 11 | 5.787  | 6.591  | 10.678 | 6.644  | 7.821  | 6.733  |        | 6.795  | 5.59   | 4.451  | 7.271  | 6.188  | 6.904  | 6.263  | 5.607  | 6.145  | 6.948  | 6.681  |        |         | 0.31046   | 0.42147 | 0.65872   | 0.32192 | 0.71817       | 0.01327 | 0.24669 | 0.53206 | 0.14351        | 1.15779  |
| Atcay       | Ataxia, cerebellar, Cayman type homolog (human)                   | A1852423    | 10 | 8.44   | 9.12   | 8.918  | 9.16   | 8.898  | 8.717  | 8.262  | 8.786  | 8.676  | 8.867  | 8.789  | 8.828  | 8.769  | 8.8    | 8.894  | 8.277  | 8.462  | 8.728  | 8.488  | 8.489   | 0.50230   | 0.45626 | 0.21126   | 0.23154 | 0.17628       | 0.02299 | 0.24359 | 0.53054 | 0.14801        | -1.17890 |
| Ate1        | Arginine-tRNA-protein transferase 1                               | BQ562966    | 7  | 6.222  | 6.907  | 5.73   | 7.434  | 3.835  | 3.747  |        | 1.555  | 6.519  | 2.385  | 5.744  | 5.921  | 5.04   | 6.078  | 6.39   | 6.077  | 7.315  | 5.341  | 5.207  | 6.675   | 0.56954   | 0.46984 | 0.04724   | 0.19245 | 0.13267       | 0.03135 | 0.05190 | 0.42427 | 0.06745        | -0.76068 |
| Atf2        | Activating transcription factor 2                                 | BQ562962    | 2  | 5.044  | 6.292  | 3.319  | 5.592  | 4.044  |        | 8.366  | 8.568  | 6.504  | 4.666  | 5.629  | 2.852  | 5.141  | 3.941  | 6.763  | 7.39   | 3.749  | 5.666  | 4.276  | 4.585   | 0.59571   | 0.56393 | 0.03419   | 0.18856 | 0.05208       | 0.12159 | 0.15666 | 0.48562 | 0.02950        | -0.49312 |
| Atf4        | Activating transcription factor 4                                 | A1850284    | 15 | 11.068 | 11.249 | 11.097 | 10.79  | 11.343 | 11.77  | 11.225 | 11.137 | 11.307 | 11.367 | 11.509 | 11.503 | 11.323 | 11.426 | 11.379 | 11.5   | 11.686 | 11.624 | 11.733 | 11.411  | 0.00646   | 0.45165 | 0.10232   | 0.20659 | 0.11929       | 0.03607 | 0.00360 | 0.38145 | 0.08667        | -0.87132 |
| Atf5        | Activating transcription factor 5                                 | A1851042    | 7  | 5.221  | 8.693  | 5.6    | 5.172  | 4.939  | 5.509  | 7.656  | 7.154  | 6.09   | 5.388  | 5.833  | 5.833  | 5.524  | 3.855  | 5.148  | 4.882  | 5.807  | 5.662  | 5.408  | 5.208   | 0.41079   | 0.43872 | 0.04332   | 0.19132 | 0.53580       | 0.01369 | 0.06021 | 0.43048 | 0.22858        | 1.5396   |

| Gene Symbol | Name                                                                                      | Accession # | Ch | P30_C1 | P30_C2 | P30_C3 | P30_C4 | P30_C5 | P70_C1 | P70_C2 | P70_C3 | P70_C4 | P70_C5 | P30_E1 | P30_E2 | P30_E3 | P30_E4 | P30_E5 | P70_E1 | P70_E2 | P70_E3 | P70_E4 | P70_E5 | P30 Cve p | P30 FDR | P70 Cve p | P70 FDR | P30C v P70C p | Age FDR | Cve p   | Cve FDR | r <sup>2</sup> | t        |
|-------------|-------------------------------------------------------------------------------------------|-------------|----|--------|--------|--------|--------|--------|--------|--------|--------|--------|--------|--------|--------|--------|--------|--------|--------|--------|--------|--------|--------|-----------|---------|-----------|---------|---------------|---------|---------|---------|----------------|----------|
| Atp1b1      | ATPase, Na+/K+ transporting, beta 1 polypeptide                                           | Ai323965    | 1  | 7.192  | 7.964  | 7.044  | 6.788  | 7.576  | 8.015  | 5.381  | 5.94   | 5.889  | 6.17   | 6.541  |        | 6.695  | 6.746  | 5.973  | 6.809  | 6.355  | 6.593  | 6.508  | 7.57   | 0.02212   | 0.43526 | 0.35823   | 0.26257 | 0.07144       | 0.07616 | 0.65550 | 0.69237 | 0.32059        | 1.94290  |
| Atp1b2      | ATPase, Na+/K+ transporting, beta 2 polypeptide                                           | BG081834    | 11 | 9.796  | 9.68   | 9.02   | 9.628  | 9.162  |        | 8.926  | 9.297  | 8.71   | 8.542  |        | 8.502  | 9.45   | 8.946  | 9.342  | 9.367  | 9.321  | 9.618  | 9.098  | 9.28   | 0.16622   | 0.40777 | 0.02958   | 0.18707 | 0.03490       | 0.20851 | 0.92264 | 0.75391 | 0.00813        | -0.25612 |
| Atp1b3      | ATPase, Na+/K+ transporting, beta 3 polypeptide                                           | AA174683    | 9  | 10.701 | 10.325 | 10.28  | 10.291 | 10.117 | 10.26  | 10.197 | 10.344 | 10.112 | 10.153 | 10.81  | 10.293 | 10.47  | 10.372 | 10.319 | 10.348 | 10.581 | 9.991  | 10.277 | 10.46  | 0.43851   | 0.44390 | 0.30376   | 0.25134 | 0.25129       | 0.01792 | 0.20397 | 0.51061 | 0.01110        | -0.29970 |
| Atp2a1      | ATPase, Ca++ transporting, cardiac muscle, fast twitch 1                                  | Ai324248    | 7  | 7.329  | 7.803  | 7.055  | 7.408  | 7.016  | 7.412  | 6.953  | 6.42   | 7.267  | 6.971  | 8.13   | 7.956  | 8.238  | 7.042  | 7.457  | 7.841  | 7.666  | 7.273  | 7.829  | 7.531  | 0.13481   | 0.40810 | 0.01442   | 0.18182 | 0.19010       | 0.02154 | 0.00511 | 0.38351 | 0.24467        | 1.60978  |
| Atp2a2      | ATPase, Ca++ transporting, cardiac muscle, slow twitch 2                                  | BG072362    | 5  | 12.499 | 11.643 | 12.032 | 12.87  | 12.277 | 11.904 | 11.645 | 12.16  | 12.037 | 12.01  | 11.674 | 11.907 | 12.029 | 11.785 | 12.094 | 11.072 | 11.677 | 11.832 | 11.88  | 12.069 | 0.13659   | 0.40804 | 0.23559   | 0.23691 | 0.20166       | 0.02058 | 0.05775 | 0.42817 | 0.01246        | -0.31772 |
| Atp2b1      | ATPase, Ca++ transporting, plasma membrane 1                                              | BQ550494    | 10 | 6.066  | 7.076  | 6.752  | 7.031  | 7.01   | 7.603  | 7.092  | 8.359  | 8.12   | 7.489  | 7.907  | 7.176  | 7.169  | 6.741  | 6.685  | 7.927  | 7.671  | 7.935  | 7.138  | 7.011  | 0.26219   | 0.41494 | 0.53071   | 0.29666 | 0.01255       | 0.45020 | 0.77312 | 0.72218 | 0.44584        | -2.53699 |
| Atp2b2      | ATPase, Ca++ transporting, plasma membrane 2                                              | Ai854874    | 6  | 10.155 | 10.142 | 10.479 | 10.101 | 9.991  | 10.536 | 10.821 | 10.605 | 11.097 | 11.682 | 10.827 | 10.319 |        | 10.093 | 10.596 | 11.256 | 10.56  | 10.577 | 10.125 | 10.289 | 0.13417   | 0.40813 | 0.21015   | 0.23130 | 0.00847       | 0.50068 | 0.83301 | 0.73554 | 0.48741        | 2.75808  |
| Atp2c1      | ATPase, Ca++ sequestering                                                                 | BQ560091    | 9  | 5.693  | 7.165  | 7.013  | 6.426  | 5.462  |        | 8.039  | 6.302  | 5.986  | 5.153  | 6.412  | 7.312  | 6.581  | 6.977  | 5.893  | 6.276  | 6.837  | 5.366  | 7.535  | 5.644  | 0.51799   | 0.45938 | 0.95753   | 0.38352 | 0.97873       | 0.01364 | 0.74551 | 0.71570 | 0.15497        | -1.21123 |
| Atp2c2      | ATPase, Ca++ transporting, type 2C, member 2                                              | BG070298    | 8  | 6.95   | 6.324  | 5.599  | 6.458  | 6.859  | 2.585  | 3.131  | 7.815  | 6.294  | 5.251  | 4.927  | 6.623  | 5.879  | 6.34   | 5.892  | 5.958  | 6.159  | 5.052  | 5.963  | 7.689  | 0.21453   | 0.41023 | 0.31156   | 0.25296 | 0.19401       | 0.02119 | 0.58830 | 0.67225 | 0.00938        | 0.27525  |
| Atp5a1      | ATP synthase, H+ transporting, mitochondrial F1 complex, alpha subunit, isoform 1         | Ai845069    | 18 | 12.856 | 12.932 | 12.886 | 13.163 | 12.831 | 12.82  | 12.84  | 13.187 | 13.029 | 13.126 | 12.959 | 13.131 | 13.095 | 12.427 | 12.745 | 13.079 | 12.855 | 12.933 | 13.277 | 13.477 | 0.67545   | 0.49245 | 0.38844   | 0.26868 | 0.50262       | 0.01385 | 0.76771 | 0.72093 | 0.14792        | 1.17849  |
| Atp5b       | ATP synthase, H+ transporting mitochondrial F1 complex, beta subunit                      | Ai836859    | 10 | 12.744 | 12.518 | 12.748 | 12.946 | 13.061 | 13.099 | 13.025 | 13.244 | 13.082 | 13.087 | 13.067 | 12.86  | 13.375 | 12.703 | 12.85  | 12.782 | 12.952 | 13.015 | 13.441 | 12.974 | 0.29425   | 0.41909 | 0.53614   | 0.29772 | 0.01631       | 0.40188 | 0.65674 | 0.69273 | 0.26221        | 1.68619  |
| Atp5c1      | ATP synthase, H+ transporting, mitochondrial F1 complex, gamma polypeptide 1              | Ai836694    | 2  | 11.724 | 12.01  | 12.04  | 11.95  | 11.802 | 12.169 | 12.166 | 11.962 | 11.679 | 11.705 | 11.764 | 11.39  | 11.732 | 11.842 | 11.589 | 11.542 | 11.695 | 11.684 | 11.801 | 11.856 | 0.04264   | 0.42451 | 0.10222   | 0.20657 | 0.80716       | 0.01325 | 0.00602 | 0.38469 | 0.11926        | 1.04082  |
| Atp5d       | ATP synthase, H+ transporting, mitochondrial F1 complex, delta subunit                    | BG063610    | 10 | 11.222 | 11.195 | 11.337 | 11.092 | 11.292 | 11.151 | 11.549 | 11.423 | 11.162 | 11.25  | 11.339 | 11.235 | 10.933 | 11.506 | 11.272 | 11.105 | 11.282 | 11.147 | 10.807 | 11.379 | 0.78147   | 0.51589 | 0.22680   | 0.23498 | 0.39522       | 0.01472 | 0.41133 | 0.60711 | 0.01082        | 0.29575  |
| Atp5e       | ATP synthase, H+ transporting, mitochondrial F1 complex, epsilon subunit                  | BG076349    | 2  | 13.054 | 13.132 | 12.874 | 12.812 | 12.998 | 12.708 | 12.64  | 12.949 | 12.362 | 13.072 | 12.888 | 12.875 | 12.828 | 12.924 | 13.168 | 13.064 | 12.962 | 12.707 | 13.419 | 13.018 | 0.66654   | 0.49050 | 0.12638   | 0.21230 | 0.13512       | 0.03063 | 0.21714 | 0.51736 | 0.13923        | -1.13754 |
| Atp5f1      | ATP synthase, H+ transporting, mitochondrial F0 complex, subunit b, isoform 1             | BQ556562    | 3  | 3.131  | 6.294  | 4.141  | 5.34   | 4.432  | 8.285  | 5.835  | 8.203  | 5.044  | 5.087  | 5.426  | 7.087  | 5.7    | 6.353  | 5.686  | 5.437  | 5.34   | 5.534  | 5.939  | 5.979  | 0.05519   | 0.41991 | 0.28733   | 0.24790 | 0.07913       | 0.06519 | 0.63136 | 0.68541 | 0.00054        | -0.06576 |
| Atp5g1      | ATP synthase, H+ transporting, mitochondrial F0 complex, subunit c (subunit 9), isoform 1 | BG087213    | 11 | 5.923  | 7.069  | 6.604  | 6.793  | 7.016  | 6.119  | 7.472  |        | 5.188  | 5.91   | 7.175  | 6.892  | 5.954  | 6.642  | 7.802  | 7.417  | 6.982  | 7.375  | 6.092  | 6.969  | 0.58025   | 0.47207 | 0.15485   | 0.21885 | 0.32448       | 0.01583 | 0.12950 | 0.47096 | 0.06924        | -0.77147 |
| Atp5g2      | ATP synthase, H+ transporting, mitochondrial F0 complex, subunit c (subunit 9), isoform 2 | BQ551134    | 17 | 11.794 | 12.164 | 12.184 | 11.9   | 12.11  | 12.047 | 11.993 | 12.1   | 11.789 | 12.227 | 12.05  | 11.867 | 11.907 | 12.1   | 11.847 | 12.024 | 12.039 | 11.983 | 12.423 | 12.077 | 0.43560   | 0.44336 | 0.48872   | 0.28847 | 0.99416       | 0.01372 | 0.99013 | 0.76660 | 0.22221        | -1.51183 |
| Atp5g3      | ATP synthase, H+ transporting, mitochondrial F0 complex, subunit c (subunit 9), isoform 3 | Ai853628    | 2  | 12.69  | 13.016 | 12.646 | 12.83  | 13.167 | 12.404 | 12.737 | 12.724 | 13.004 | 12.396 | 12.878 | 12.803 | 12.991 | 13.066 | 13.184 | 12.793 | 12.523 | 12.946 | 13.158 | 12.982 | 0.36474   | 0.43041 | 0.18451   | 0.22554 | 0.18944       | 0.02160 | 0.10792 | 0.45897 | 0.04900        | 0.64203  |
| Atp5h       | ATP synthase, H+ transporting, mitochondrial F0 complex, subunit d                        | Ai894263    | 11 | 13.527 | 13.255 | 13.193 | 12.945 | 13.455 | 13.308 | 13.423 | 13.486 | 13.294 | 13.423 | 13.499 | 13.535 | 13.68  | 13.276 | 13.551 | 13.453 | 13.52  | 13.611 | 13.905 | 13.657 | 0.09246   | 0.41177 | 0.02238   | 0.18467 | 0.33657       | 0.01559 | 0.00555 | 0.38413 | 0.09249        | 0.90298  |
| Atp5j       | ATP synthase, H+ transporting, mitochondrial F0 complex, subunit f                        | BG072808    | 16 | 13.535 | 13.202 | 13.461 | 13.235 | 13.524 | 13.312 | 13.356 | 13.386 | 13.335 | 13.454 | 13.299 | 13.098 | 13.323 | 13.394 | 13.226 | 13.174 | 13.309 | 13.243 | 13.53  | 13.287 | 0.19716   | 0.40903 | 0.38160   | 0.26730 | 0.77178       | 0.01324 | 0.09476 | 0.45140 | 0.16481        | 1.25643  |
| Atp5j2      | ATP synthase, H+ transporting, mitochondrial F0 complex, subunit f, isoform 2             | BG073062    | 5  | 10.011 | 10.11  | 9.932  | 10.517 | 9.464  | 8.556  | 9.698  | 9.816  | 9.831  | 10.099 | 9.893  | 9.472  | 10.21  | 10.362 | 10.411 | 9.923  | 9.753  | 10.686 | 9.883  | 10     | 0.80262   | 0.52058 | 0.19220   | 0.22728 | 0.23638       | 0.01855 | 0.21598 | 0.51677 | 0.02780        | 0.47825  |
| Atp5k       | ATP synthase, H+ transporting, mitochondrial F1F0 complex, subunit e                      | BG072635    | 5  | 13.825 | 13.805 | 14.016 | 13.742 | 13.636 | 13.447 | 13.507 | 13.766 | 13.773 | 13.62  | 13.782 | 13.729 | 13.778 | 13.642 | 13.587 | 13.609 | 13.705 | 13.701 | 13.634 | 13.653 | 0.20419   | 0.40948 | 0.59724   | 0.30973 | 0.07966       | 0.06455 | 0.58293 | 0.67054 | 0.05309        | -0.66972 |
| Atp5l       | ATP synthase, H+ transporting, mitochondrial F0 complex, subunit g                        | BG069449    | 9  | 11.289 | 11.084 | 11.045 | 11.491 |        | 10.787 | 11.22  | 10.728 | 10.917 | 10.63  | 10.919 | 10.79  | 11.068 | 11.106 | 11.043 | 10.997 | 10.984 | 11.012 | 10.796 | 11.02  | 0.06708   | 0.41659 | 0.36749   | 0.26445 | 0.03952       | 0.17821 | 0.62613 | 0.68386 | 0.02554        | -0.45787 |
| Atp5o       | ATP synthase, H+ transporting, mitochondrial F1 complex, O subunit                        | CK334900    | 16 | 11.662 | 11.944 | 11.595 | 11.57  | 11.957 | 11.819 | 11.575 | 11.395 | 11.349 | 11.709 | 11.375 | 11.917 | 11.685 | 11.299 | 11.688 | 11.535 | 11.729 | 11.742 | 11.944 | 11.644 | 0.31199   | 0.42171 | 0.21951   | 0.23337 | 0.19171       | 0.02140 | 0.98554 | 0.76577 | 0.39147        | -2.26858 |
| Atp5s       | ATP synthase, H+ transporting, mitochondrial F0 complex, subunit s                        | Ai848709    | 12 | 10.406 | 10.053 | 10.192 | 10.482 | 9.936  | 9.562  | 10.205 | 10.008 |        | 9.732  | 9.961  | 10.236 | 10.317 | 10.167 | 10.027 | 9.943  | 9.939  | 9.947  | 10.171 | 9.862  | 0.57081   | 0.47011 | 0.51264   | 0.29314 | 0.09007       | 0.05378 | 0.94860 | 0.75891 | 0.06306        | 0.73378  |
| Atp5sl      | ATP5S-like                                                                                | Ai841521    | 7  | 7.828  | 8.631  | 8.298  | 7.485  | 7.691  | 9.745  | 8.252  | 8.73   | 7.627  | 7.971  | 8.366  | 8.307  | 9.731  | 7.638  | 8.233  | 8.455  | 8.055  | 8.436  | 8.313  | 7.824  | 0.27882   | 0.41699 | 0.53888   | 0.29825 | 0.29071       | 0.01663 | 0.69708 | 0.70365 | 0.25108        | 1.63770  |
| Atp6ap1     | ATPase, H+ transporting, lysosomal accessory protein 1                                    | Ai853870    | X  | 12.091 | 12.127 | 12.722 | 12.28  | 12.308 | 10.82  | 12.406 | 12.149 | 11.95  | 12.015 | 11.927 | 12.223 | 12.119 | 12.327 | 12.188 | 12.486 | 12.019 | 11.845 | 12.365 | 12.276 | 0.28715   | 0.41810 | 0.29909   | 0.25036 | 0.17698       | 0.02290 | 0.59958 | 0.67579 | 0.03985        | -0.57625 |
| Atp6ap2     | ATPase, H+ transporting, lysosomal accessory protein 2                                    | Ai844668    | X  | 11.295 | 11.315 | 11.6   | 11.591 | 11.298 | 11.463 | 11.505 | 11.619 | 11.588 | 11.786 | 11.956 | 11.338 | 11.196 | 11.755 | 11.303 | 11.492 | 11.66  | 11.178 | 11.403 | 11.33  | 0.59733   | 0.47566 | 0.10419   | 0.20704 | 0.09489       | 0.04983 | 0.64433 | 0.68919 | 0.00258        | -0.14374 |
| Atp6v0a1    | ATPase, H+ transporting, lysosomal V0 subunit A1                                          | Ai841797    | 11 | 7.459  | 6.205  | 5.44   | 4.307  | 4.399  | 4.706  | 10.208 | 7.934  | 5.102  | 5.281  | 9.568  | 11.688 | 6.112  | 5.182  | 5.768  | 5.792  | 5.687  | 6.715  | 4.614  | 7.109  | 0.17043   | 0.40787 | 0.57818   | 0.30597 | 0.39663       | 0.01471 | 0.44119 | 0.61930 | 0.00986        | 0.28225  |
| Atp6v0a2    | ATPase, H+ transporting, lysosomal V0 subunit A2                                          | BQ553279    | 5  | 5.6    | 6.419  | 6.242  | 6.309  | 7.099  | 8.113  | 5.823  | 7.198  | 6.553  | 6.338  | 7.219  | 7.23   | 7.029  | 8.057  | 5.87   | 7.552  | 6.001  | 6.755  | 6.772  | 7.1    | 0.36186   | 0.42990 | 0.94894   | 0.38163 | 0.70830       | 0.01328 | 0.44337 | 0.62017 | 0.03113        | 0.50703  |
| Atp6v0a4    | ATPase, H+ transporting, lysosomal V0 subunit A4                                          | BG069559    | 6  | 8.131  | 7.934  | 7.65   | 7.773  | 7.045  | 8.762  | 7.594  | 7.562  | 7.19   | 7.79   | 6.987  | 7.467  | 7.912  | 7.552  | 7.083  |        | 7.779  | 7.644  | 7.342  | 6.952  | 0.25309   | 0.43900 | 0.33712   | 0.25825 | 0.82626       | 0.01327 | 0.10829 | 0.45917 | 0.00000        | 0.00213  |
| Atp6v0b     | ATPase, H+ transporting, lysosomal V0 subunit B                                           | BG074864    | 4  | 9.841  | 9.562  | 10.126 | 9.683  | 9.728  | 10.25  | 10.818 | 10.359 | 10.085 | 10.123 | 9.953  |        |        |        |        |        |        |        |        |        |           |         |           |         |               |         |         |         |                |          |

| Gene Symbol | Name                                                                     | Accession # | Ch | P30_C1 | P30_C2 | P30_C3 | P30_C4 | P30_C5 | P70_C1 | P70_C2 | P70_C3 | P70_C4 | P70_C5 | P30_E1 | P30_E2 | P30_E3 | P30_E4 | P30_E5 | P70_E1 | P70_E2 | P70_E3 | P70_E4 | P70_E5  | P30_CvE p | P30_FDR | P70_CvE p | P70_FDR | P30C v P70C p | Age FDR | CvE p   | CvE FDR | r <sup>2</sup> | t        |
|-------------|--------------------------------------------------------------------------|-------------|----|--------|--------|--------|--------|--------|--------|--------|--------|--------|--------|--------|--------|--------|--------|--------|--------|--------|--------|--------|---------|-----------|---------|-----------|---------|---------------|---------|---------|---------|----------------|----------|
| Atp6v1g3    | ATPase, H+ transporting, lysosomal V1 subunit G3                         | A1644431    | 1  | 9.652  | 9.56   | 9.508  | 10.943 | 10.306 | 9.857  | 9.044  | 9.809  | 9.623  | 10.103 | 5.191  | 9.157  | 9.847  | 10.291 | 9.852  | 9.86   | 9.633  | 9.676  | 10.004 | 7.129   | 0.28236   | 0.41745 | 0.47222   | 0.28525 | 0.37959       | 0.01492 | 0.16663 | 0.49096 | 0.00654        | 0.22953  |
| Atp7a       | ATPase, Cu++ transporting, alpha polypeptide                             | BQ552336    | X  | 6.503  | 5.452  | 4.225  | 5.3    | 5.362  | 6.904  | 6.52   | 5.973  | 5.672  | 6.409  | 5.755  | 5.855  | 5.103  | 7.672  | 4.912  | 6.308  | 5.887  | 5.826  | 5.183  | 6.129   | 0.44207   | 0.44458 | 0.17472   | 0.22334 | 0.05843       | 0.10287 | 0.93089 | 0.75552 | 0.00180        | 0.12001  |
| Atp8a1      | ATPase, aminophospholipid transporter (APLT), class I, type 8A, member 1 | BQ553013    | 5  | 8.917  | 8.24   | 7.748  | 8.145  | 8.356  | 7.653  | 6.657  | 7.83   | 7.148  | 8.31   | 8.176  | 7.729  | 7.921  | 8.359  | 7.905  | 8.107  | 7.917  | 7.746  | 7.582  | 8.102   | 0.26428   | 0.41519 | 0.25458   | 0.24101 | 0.05641       | 0.10837 | 0.80726 | 0.72991 | 0.48456        | 2.74237  |
| Atp8a2      | ATPase, aminophospholipid transporter-like, class I, type 8A, member 2   | A4465215    | 14 | 7.515  | 7.382  | 7.44   | 7.053  | 7.814  |        | 6.813  | 7.554  | 7.276  | 7.007  | 7.38   | 7.386  | 7.065  | 6.802  | 7.145  | 7.713  | 6.845  | 6.689  | 6.79   | 7.234   | 0.11949   | 0.40894 | 0.68586   | 0.32733 | 0.20307       | 0.02047 | 0.16920 | 0.49234 | 0.08262        | 0.84880  |
| Atp8b2      | ATPase, class I, type 8B, member 2                                       | BG064229    | 3  | 8.361  | 8.647  | 8.305  | 8.18   | 8.014  | 7.807  | 7.721  | 8.495  | 6.313  | 8.585  | 8.38   | 8.043  | 8.549  | 8.563  | 8.112  | 7.586  | 8.13   | 8.314  | 7.821  | 8.488   | 0.885735  | 0.53271 | 0.53611   | 0.29771 | 0.25361       | 0.01783 | 0.52285 | 0.65022 | 0.14774        | -1.17763 |
| Atp9a       | ATPase, class II, type 9A                                                | A1849968    | 2  | 9.262  | 8.879  | 8.685  | 7.565  | 9.254  | 9.264  | 8.737  | 8.729  | 9.057  | 9.418  | 8.618  | 9.277  | 9.149  | 8.522  | 9.307  | 8.652  | 8.685  | 8.94   | 8.686  | 9.1     | 0.50722   | 0.45724 | 0.20153   | 0.22937 | 0.38650       | 0.01483 | 0.96494 | 0.76198 | 0.01770        | 0.37970  |
| Atp9b       | ATPase, class II, type 9B                                                | A1854763    | 18 | 8.615  | 8.547  | 8.584  | 9.246  | 8.605  | 8.462  | 8.861  | 8.345  | 8.493  | 9.986  | 8.53   | 8.722  | 8.375  | 8.86   | 8.714  | 8.314  | 8.29   | 8.864  | 8.714  | 8.66    | 0.85862   | 0.53299 | 0.72664   | 0.33545 | 0.65766       | 0.01335 | 0.91423 | 0.70253 | 0.08491        | 0.86157  |
| Atpaf1      | ATP synthase mitochondrial F1 complex assembly factor 1                  | A1853987    | 4  | 8.977  | 9.768  | 8.622  | 9.33   | 8.778  | 9.176  | 8.98   | 8.977  | 8.461  | 9.316  | 8.877  | 8.726  | 8.9    | 8.804  | 9.201  | 9.214  | 9.257  | 9.167  | 9.334  | 9.615   | 0.40704   | 0.43803 | 0.70697   | 0.20031 | 0.66537       | 0.01334 | 0.63856 | 0.68752 | 0.01115        | -0.30029 |
| Atpaf2      | ATP synthase mitochondrial F1 complex assembly factor 2                  | CK335192    | 11 | 6.285  | 7.652  | 6.529  | 7.098  | 6.803  | 6.065  | 5.181  | 6.699  | 5.656  | 6.759  | 6.618  | 7.298  | 6.917  | 8.149  | 7.863  | 6.783  | 6.825  | 7.415  | 6.979  | 6.948   | 0.21831   | 0.41053 | 0.02170   | 0.18443 | 0.07071       | 0.07736 | 0.01923 | 0.39906 | 0.07317        | -0.79470 |
| Atpbd4      | ATP binding domain 4                                                     | BG068785    | 2  | 6.73   | 4.645  | 6.81   | 5.378  | 6.217  | 5.062  | 7.243  | 7.015  | 5.767  | 5.65   | 5.734  | 5.261  | 6.084  | 6.87   | 4.646  |        | 5.745  | 4.786  | 6.767  | 0.95990 | 0.55596   | 0.25659 | 0.24144   | 0.58718 | 0.01352       | 0.37272 | 0.59058 | 0.27887 | 1.75588        |          |
| Atpif1      | ATPase inhibitory factor 1                                               | A1853679    | 4  | 10.595 | 10.674 | 9.882  | 10.413 | 9.905  | 10.391 | 9.844  | 10.178 | 10.231 | 10.367 | 9.733  | 10.104 | 9.716  | 10.277 | 10.169 | 10.225 | 10.663 | 10.091 | 10.354 | 9.799   | 0.18892   | 0.40857 | 0.89237   | 0.36943 | 0.65155       | 0.01336 | 0.32330 | 0.56833 | 0.05091        | 0.65808  |
| Atr         | Ataxia telangiectasia and Rad3 related                                   | A1450987    | 9  | 4      | 5.434  | 3.931  | 4.425  | 5.374  | 5.651  | 5.656  | 6.088  | 6.083  | 6.609  | 5.134  | 4.708  | 4.645  | 5.091  | 5.656  | 5.227  | 5.549  | 5.674  | 5.346  | 5.858   | 0.11894   | 0.40898 | 0.10605   | 0.20749 | 0.00879       | 0.49737 | 0.42359 | 0.61217 | 0.11711        | -1.03011 |
| Atrn        | Attractin                                                                | BG076058    | 2  | 8.2    | 7.245  | 6.829  | 7.466  | 7.471  | 7.531  | 7.244  | 6.116  | 6.637  | 7.443  | 7.287  | 7.974  | 6.777  | 7.124  | 7.253  | 6.627  | 7.148  | 7.526  | 7.07   | 0.36673 | 0.43076   | 0.14765 | 0.21721   | 0.05939 | 0.10045       | 0.92347 | 0.75408 | 0.12064 | 1.04762        |          |
| Atrn1       | Attractin like 1                                                         | BG075229    | 19 | 10.259 | 9.668  | 9.892  |        | 9.332  | 9.508  | 10.263 | 9.764  | 9.155  | 9.768  | 9.69   | 9.784  | 9.497  | 9.422  | 10.056 | 9.741  | 9.593  | 9.907  | 9.62   | 9.868   | 0.65981   | 0.48904 | 0.78518   | 0.34723 | 0.72999       | 0.01326 | 0.90419 | 0.75028 | 0.01975        | -0.40148 |
| Atrx        | Alpha thalassemia/mental retardation syndrome X-linked homolog (human)   | A1844822    | X  | 10.855 | 10.369 | 10.653 | 10.771 | 10.611 | 10.192 | 10.621 | 10.347 | 10.963 | 10.682 | 10.944 | 11.338 | 10.251 | 10.501 | 10.905 | 10.872 | 11.273 | 10.996 |        | 10.733  | 0.52760   | 0.46130 | 0.06109   | 0.19620 | 0.58118       | 0.01353 | 0.06882 | 0.43538 | 0.18540        | 1.34936  |
| Atxn1       | Ataxin 1                                                                 | A1848153    | 13 | 6.044  | 6.22   | 9.57   | 6.228  | 4.774  | 8.115  | 14.123 | 11.611 | 6.085  | 6.087  | 5.782  | 7.741  | 7.374  | 6.155  | 6.316  | 5.562  | 6.536  | 5.884  | 6.618  | 7.367   | 0.90697   | 0.54386 | 0.22645   | 0.23491 | 0.35490       | 0.01527 | 0.29328 | 0.55433 | 0.03623        | -0.54841 |
| Atxn10      | Ataxin 10                                                                | CK344744    | 15 | 10.134 | 10.295 | 10.149 | 10.345 | 10.492 |        | 10.611 | 10.165 | 10.454 | 9.995  | 9.982  | 9.941  | 9.81   | 9.324  | 9.947  | 9.876  | 9.951  | 10.071 | 10.099 | 10.068  | 0.00861   | 0.44829 | 0.06051   | 0.19605 | 0.87689       | 0.01333 | 0.00103 | 0.37781 | 0.00870        | 0.26494  |
| Atxn2       | Ataxin 2                                                                 | A1852410    | 5  | 4.872  | 5.47   | 6.202  | 6.867  | 6.036  | 7.155  | 9.833  | 7.008  | 6.47   | 5.248  | 6.805  | 5.777  | 6.029  | 6.57   | 6.44   | 9.976  | 7.314  | 7.418  | 5.922  | 4.526   | 0.29245   | 0.41884 | 0.92679   | 0.37680 | 0.16679       | 0.02422 | 0.40085 | 0.72848 | 0.01476        | -0.34623 |
| Atxn2l      | Ataxin 2-like                                                            | A1843710    | 7  | 11.433 | 11.038 | 10.82  | 11.157 | 11.188 | 11.488 | 11.149 | 11.143 | 11.025 | 11.094 | 11.127 | 11.203 | 10.949 | 11.149 | 10.949 | 10.666 | 11.105 | 11.234 | 10.92  | 11.245  | 0.66223   | 0.48956 | 0.30691   | 0.25199 | 0.68840       | 0.01330 | 0.24748 | 0.53244 | 0.43478        | 2.48070  |
| Atxn3       | Ataxin 3                                                                 | BQ559756    | 12 | 8.596  | 4.459  | 4.977  | 4.578  | 5.907  | 7.34   | 3.697  | 5.524  | 5.222  | 4.392  | 4.585  | 2.617  | 6.492  | 3.769  | 3.648  | 2.666  | 4.307  | 4.822  | 3.684  | 5.018   | 0.17824   | 0.40811 | 0.21733   | 0.23289 | 0.60551       | 0.01347 | 0.05167 | 0.42412 | 0.08927        | 0.88551  |
| Atxn7i3     | Ataxin 7-like 3                                                          | BQ550769    | 11 | 6.555  | 6.267  | 6.415  | 6.945  | 6.109  | 6.082  | 6.073  | 5.944  | 6.017  | 5.994  | 5.431  | 6.151  | 6.358  | 7.009  | 5.653  | 6.04   | 5.818  | 6.473  | 6.113  | 6.434   | 0.31056   | 0.42149 | 0.25822   | 0.24179 | 0.01679       | 0.39588 | 0.70646 | 0.67736 | 0.02116        | 0.41587  |
| Auh         | Hydrolase                                                                | BQ560021    | 13 | 4.821  | 6.304  | 3.528  | 5.804  | 5.644  | 5.524  | 6.785  | 6.933  | 6.242  | 5.656  | 6.24   | 5.486  | 5.421  | 8.598  | 5.327  | 7.278  | 5.487  | 5.137  | 4.73   | 0.13849 | 0.40797   | 0.02110 | 0.18423   | 0.11092 | 0.09989       | 0.65665 | 0.71834 | 0.34899 | -2.07061       |          |
| Aup1        | Ancient ubiquitous protein                                               | BG073652    | 6  | 10.057 | 10.695 | 10.039 | 10.377 | 10.139 | 10.111 | 10.095 | 10.3   | 10.073 | 10.031 | 10.425 | 10.254 | 10.102 | 9.985  | 10.231 | 10.887 | 10.107 | 10.055 | 10.267 | 10.682  | 0.67931   | 0.49329 | 0.15897   | 0.21978 | 0.32320       | 0.01585 | 0.37223 | 0.59036 | 0.03112        | -0.50690 |
| Aurka       | Aurora kinase A                                                          | BQ559508    | 2  | 9.967  | 5.437  | 6.834  | 5.755  | 5.873  | 7.083  | 6.697  | 6.432  | 7.07   | 6.028  | 6.831  | 5.615  | 8.282  | 4.879  | 5.59   | 6.479  | 5.764  | 6.433  | 6.218  | 6.426   | 0.28037   | 0.41719 | 0.13597   | 0.21453 | 0.21802       | 0.01950 | 0.10962 | 0.45992 | 0.39895        | 2.30433  |
| Aurkap1     | Aurora kinase A interacting protein 1                                    | BG066690    | 4  | 8.469  | 8.59   | 8.026  | 8.895  | 7.722  | 8.133  | 8.979  | 8.893  | 8.892  | 7.714  | 7.953  | 8.334  | 8.282  | 8.201  | 8.296  | 8.563  | 8.459  | 8.672  | 8.999  | 8.162   | 0.54730   | 0.46528 | 0.86973   | 0.36466 | 0.63925       | 0.01339 | 0.98854 | 0.72796 | 0.01535        | 0.35316  |
| Aurkb       | Aurora kinase B                                                          | BG062968    | 11 | 7.522  | 8.661  | 6.571  | 7.015  | 7.004  | 7.613  | 8.374  | 8.129  | 7.58   | 6.779  | 8.191  | 7.962  | 7.78   | 8.585  | 7.865  | 7.64   | 7.489  | 8.074  | 8.215  | 8.549   | 0.10404   | 0.41032 | 0.41277   | 0.27355 | 0.45838       | 0.01413 | 0.05881 | 0.42887 | 0.05569        | -0.68620 |
| Aurkc       | Aurora kinase C                                                          | BG067380    | 7  | 6.07   | 6.455  | 6.17   | 8.117  | 5.518  | 6.946  | 7.242  | 6.965  | 5.981  | 4.71   | 6.953  | 5.388  | 5.889  | 7.34   | 7.376  | 6.585  | 6.876  | 9.814  | 6.794  | 8.267   | 0.84154   | 0.52919 | 0.13056   | 0.21327 | 0.88326       | 0.01334 | 0.16702 | 0.49117 | 0.13465        | 1.11475  |
| Aut2        | Autism susceptibility candidate 2                                        | A1853229    | 5  | 8.467  | 8.546  | 8.751  | 8.813  | 8.888  | 9.011  | 8.748  | 8.966  | 8.461  | 8.453  | 8.782  | 8.408  | 8.585  | 7.581  | 8.254  | 6.237  | 8.447  | 8.485  | 8.779  | 8.795   | 0.16508   | 0.40775 | 0.17791   | 0.22406 | 0.92336       | 0.01344 | 0.90370 | 0.41426 | 0.03642        | 0.54992  |
| Avp1        | Arginine vasopressin-induced 1                                           | BG063000    | 19 | 8.91   | 8.927  | 8.836  | 8.538  | 8.959  | 8.552  | 8.954  | 8.833  | 8.727  | 8.733  | 8.731  | 8.497  | 9.021  | 9.029  | 8.661  | 9.39   | 9.119  | 9.257  | 8.757  | 9.263   | 0.94840   | 0.55329 | 0.01429   | 0.18177 | 0.77642       | 0.01324 | 0.10204 | 0.45562 | 0.00015        | 0.03500  |
| Avpr1a      | Arginine vasopressin receptor 1A                                         | BG073187    | 10 | 7.951  | 8.171  | 7.86   | 7.559  | 8.006  | 7.925  | 8.89   | 8.603  | 8.188  | 8.431  | 8.534  | 7.885  | 8.175  | 8.565  | 8.19   | 7.623  | 8.041  | 8.127  | 7.596  | 7.882   | 0.08025   | 0.41377 | 0.03203   | 0.18787 | 0.04558       | 0.14704 | 0.03720 | 0.65527 | 0.01708        | -0.37283 |
| Axin1       | Axin 1                                                                   | BG072066    | 17 | 6.739  | 7.736  | 7.862  | 8.14   | 7.002  | 7.083  | 6.94   | 7.423  | 6.903  | 7.028  | 8.043  | 8.356  | 7.855  | 7.313  | 7.034  | 7.225  | 7.752  | 7.994  | 7.254  | 7.164   | 0.55002   | 0.46584 | 0.06755   | 0.19788 | 0.17485       | 0.02316 | 0.14957 | 0.48182 | 0.03388        | 0.52968  |
| Axud1       | AXIN1 up-regulated 1                                                     | A1849021    | 9  | 5.809  | 6.149  | 7.764  | 7.144  | 6.618  | 6.717  | 7.15   | 5.982  | 6.202  | 6.443  | 6.955  | 7.41   | 7.193  | 6.019  | 5.741  | 6.329  | 6.157  | 5.669  | 6.117  | 5.797   | 0.94664   | 0.55289 | 0.03187   | 0.18782 | 0.63717       | 0.01339 | 0.28804 | 0.55185 | 0.53549        | 0.30683  |
| AY217089    |                                                                          | AY217089    | 3  | 3.362  | 5.138  | 4.937  | 4.17   | 4.789  | 7.767  | 7.072  | 6.044  | 6.899  | 4.888  | 5.205  | 7.267  | 4.502  | 3.98   | 3.738  | 5.495  | 6.091  | 5.337  |        | 5.639   | 0.53678   | 0.46315 | 0.20830   | 0.23088 | 0.01163       | 0.46270 | 0.68994 | 0.70178 | 0.14465        | 1.16316  |
| Az12        | 5-azacytidine induced gene                                               |             |    |        |        |        |        |        |        |        |        |        |        |        |        |        |        |        |        |        |        |        |         |           |         |           |         |               |         |         |         |                |          |

| Gene Symbol   | Name                                                                                  | Accession # | Ch | P30_C1 | P30_C2 | P30_C3 | P30_C4 | P30_C5 | P70_C1 | P70_C2 | P70_C3 | P70_C4 | P70_C5 | P30_E1 | P30_E2 | P30_E3 | P30_E4 | P30_E5 | P70_E1 | P70_E2 | P70_E3 | P70_E4 | P70_E5  | P30_CvE p | P30_FDR | P70_CvE p | P70_FDR | P30C v P70C p | Age FDR | CvE p   | CvE FDR | r <sup>2</sup> | t        |
|---------------|---------------------------------------------------------------------------------------|-------------|----|--------|--------|--------|--------|--------|--------|--------|--------|--------|--------|--------|--------|--------|--------|--------|--------|--------|--------|--------|---------|-----------|---------|-----------|---------|---------------|---------|---------|---------|----------------|----------|
| B4galT5       | UDP-Gal:betaGlcNAc beta 1,4-galactosyltransferase, polypeptide 5                      | A1852199    | 2  | 4.134  | 6.17   | 5.663  | 1.415  | 6.322  | 11.966 | 7.238  | 7.456  | 5.357  | 5.17   | 6.779  | 6.482  | 7.444  | 5.059  | 6.371  | 4.515  | 3.877  | 5.322  | 0      | 5.03    | 0.12907   | 0.40836 | 0.04584   | 0.19206 | 0.11608       | 0.03745 | 0.36569 | 0.58748 | 0.39898        | 2.30448  |
| B4galT6       | UDP-Gal:betaGlcNAc beta 1,4-galactosyltransferase, polypeptide 6                      | BG066773    | 18 | 9.817  | 8.953  | 9.423  | 9.78   | 9.394  | 8.999  | 9.001  | 8.724  | 9.083  | 4.823  | 9.281  | 9.388  | 8.856  | 8.287  | 8.896  | 9.254  | 9.732  | 9.638  | 9.373  | 9.131   | 0.06556   | 0.41697 | 0.15855   | 0.21969 | 0.14851       | 0.02737 | 0.42987 | 0.61473 | 0.07798        | -0.82254 |
| B4galT7       | Xylosylprotein beta1,4-galactosyltransferase, polypeptide 7 (galactosyltransferase I) | BG078008    | 13 | 7.007  | 7.137  | 8.24   | 5.728  | 6.715  | 6.579  | 7.044  | 6.755  | 6.915  | 6.079  | 7.039  | 7.582  | 8.528  | 7.298  | 7.401  | 7.236  | 7.235  | 6.762  | 7.221  | 7.585   | 0.24098   | 0.41260 | 0.03669   | 0.18934 | 0.52393       | 0.01374 | 0.04084 | 0.41645 | 0.16099        | -1.23899 |
| B630005N14RIK | RIKEN cDNA B630005N14 gene                                                            | BQ551931    | 6  | 8.953  | 8.823  | 9.198  | 9.253  | 8.634  | 9.245  | 8.218  | 8.507  | 8.443  | 8.464  | 8.775  | 9.512  | 8.455  | 10.987 | 8.618  | 8.301  | 9.145  | 8.695  | 8.559  | 8.622   | 0.55302   | 0.46646 | 0.69926   | 0.33000 | 0.09480       | 0.04090 | 0.49459 | 0.63991 | 0.01121        | -0.30109 |
| B63019K06RIK  | RIKEN cDNA B63019K06 gene                                                             | A1843180    | X  | 11.274 | 10.618 | 10.141 | 10.208 | 10.753 | 10.964 | 9.979  | 10.425 | 9.986  | 10.359 | 10.613 | 10.526 | 10.288 | 10.389 | 10.409 | 10.105 | 10.468 | 10.427 | 10.579 | 10.099  | 0.49055   | 0.45395 | 0.87226   | 0.36519 | 0.24416       | 0.01821 | 0.65177 | 0.69132 | 0.07572        | 0.80955  |
| B830045N13RIK | RIKEN cDNA B830045N13 gene                                                            | A1840151    | 1  | 5.304  | 6.039  | 6.031  | 6.911  | 5.176  | 5.874  | 7.102  | 6.34   | 7.024  | 5.513  | 5.652  | 5.878  | 5.228  | 6.874  | 5.741  | 5.953  | 6.234  | 6.135  | 6.204  | 5.558   | 0.96710   | 0.55763 | 0.29683   | 0.24989 | 0.40192       | 0.01464 | 0.04090 | 0.60442 | 0.24653        | 0.161789 |
| B930006L02RIK | RIKEN cDNA B930006L02 gene                                                            | BG036702    | 7  | 7.883  | 8.483  | 8.331  | 6.617  | 7.766  | 7.753  | 7.818  | 7.996  | 7.929  | 8.413  | 8.08   | 9.525  | 8.359  | 8.717  | 8.592  | 8.385  | 8.798  | 9.278  | 7.784  | 0.10585 | 0.41013   | 0.07097 | 0.19877   | 0.11620 | 0.03740       | 0.01057 | 0.39010 | 0.04676 | -0.62642       |          |
| B930041F14RIK | RIKEN cDNA B930041F14 gene                                                            | A1844938    | 4  | 10.976 | 10.896 | 11.247 | 10.803 | 10.10  | 10.909 | 10.785 | 11.033 | 11.06  | 11.014 | 11.241 | 11.159 | 10.977 | 10.994 | 10.817 | 10.811 | 12.714 | 10.718 | 10.942 | 0.37883 | 0.43291   | 0.48255 | 0.28727   | 0.57038 | 0.01357       | 0.34335 | 0.57747 | 0.01919 | 0.39565        |          |
| B930053N05RIK | RIKEN cDNA B930053N05 gene                                                            | BG073929    | 14 | 9.079  | 7.612  | 7.067  | 6.981  | 6.643  | 8.718  | 8.069  | 6.904  | 6.975  | 7.341  | 5.747  | 7.661  | 7.667  | 8.948  | 8.686  | 7.017  | 7.671  | 8.16   | 7.081  | 6.661   | 0.71760   | 0.50173 | 0.49561   | 0.28982 | 0.68873       | 0.01330 | 0.92353 | 0.75409 | 0.05961        | 0.71213  |
| B930095G15RIK | RIKEN cDNA B930095G15 gene                                                            | BG072250    | 14 | 7.859  | 8.325  | 7.212  | 7.813  | 9.161  | 7.366  | 7.571  | 7.307  | 7.604  | 7.061  | 8.034  | 8.493  | 7.459  | 7.651  | 8.114  | 7.755  | 8.792  | 8.264  | 7.561  | 0.74756 | 0.50837   | 0.03230 | 0.18796   | 0.07532 | 0.07027       | 0.27252 | 0.54449 | 0.01373 | 0.33378        |          |
| B9d1          | B9 protein domain 1                                                                   | BG064568    | 11 | 6.086  | 7.35   | 6.515  | 7.399  | 7.248  | 7.768  | 6.545  | 7.56   | 7.098  | 6.889  | 7.047  | 8.857  | 6.806  | 7.142  | 7.607  | 7.447  | 8.105  | 6.509  | 7.357  | 6.965   | 0.23920   | 0.41242 | 0.77004   | 0.34416 | 0.48400       | 0.01395 | 0.23136 | 0.52448 | 0.39890        | 2.30409  |
| B9d2          | B9 protein domain 2                                                                   | A143808     | 7  | 6.877  | 5.664  | 7.552  | 4.675  | 6.253  | 4.194  | 7.66   | 4.764  | 5.469  | 5.805  | 5.568  | 4.983  | 4.314  | 4.752  | 5.237  | 5.426  | 4.33   | 5.134  | 5.194  | 5.305   | 0.05137   | 0.42117 | 0.44382   | 0.27970 | 0.44026       | 0.01427 | 0.04478 | 0.41933 | 0.02424        | -0.44578 |
| Ba1c          | Brain and acute leukemia, cytoplasmic                                                 | A1854147    | 15 | 8.625  | 8.129  | 9.36   | 8.255  | 9.44   | 10.956 | 10.19  | 9.904  | 8.437  | 9.211  | 8.991  | 8.314  | 9.212  | 7.965  | 9.201  | 9.161  | 7.404  | 8.383  | 6.135  | 6.135   | 0.94772   | 0.55314 | 0.01458   | 0.18189 | 0.09092       | 0.05305 | 0.02503 | 0.40427 | 0.00001        | 0.00742  |
| Ba2e1         | Beta-site APP-cleaving enzyme 1                                                       | A1850293    | 9  | 9.711  | 9.19   | 8.97   | 10.005 | 8.997  | 8.965  | 9.352  | 9.223  | 8.839  | 9.136  | 9.511  | 9.195  | 8.947  | 9.504  | 9.493  | 8.794  | 9.258  | 8.959  | 9.317  | 8.852   | 0.85427   | 0.53202 | 0.64539   | 0.31927 | 0.26288       | 0.01749 | 0.70536 | 0.70579 | 0.00403        | 0.18002  |
| Ba2e2         | Beta-site APP-cleaving enzyme 2                                                       | A141517     | 16 | 6.087  | 5.608  | 4.809  | 5.715  | 6.465  | 6.493  | 7.536  | 6.19   | 5.47   | 5.814  | 6.698  | 5.304  | 6.2    | 6.248  | 4.553  | 6.753  | 6.332  | 6.117  | 6.121  | 0.40845 | 0.43829   | 0.45637 | 0.28215   | 0.20467 | 0.02036       | 0.93438 | 0.75619 | 0.02196 | 1.50059        |          |
| Ba2h1         | BTB and CINC homology 1                                                               | BG075077    | 16 | 6.698  | 7.147  | 6.966  | 6.851  | 7.566  | 8.044  | 7.132  | 7.167  | 6.915  | 6.567  | 8.144  | 7.528  | 7.153  | 7.644  | 7.689  | 7.45   | 8.149  | 7.442  | 8.173  | 7.235   | 0.02747   | 0.43201 | 0.13252   | 0.21373 | 0.68767       | 0.01300 | 0.06667 | 0.38555 | 0.12196        | 1.05413  |
| Ba2h2         | BTB and CINC homology 2                                                               | A1665530    | 4  | 5.454  | 4.843  | 4.999  | 5      | 5.679  | 6.358  | 9.881  | 4.541  | 7.105  | 4.358  | 4.379  | 6.031  | 5.633  | 4.428  | 5.911  | 5.72   | 4.928  | 5.228  | 3.086  | 0.86716 | 0.53490   | 0.13679 | 0.21472   | 0.25818 | 0.01784       | 0.12868 | 0.47029 | 0.06060 | 0.71841        |          |
| Ba2d          | Bcl-associated death promoter                                                         | A1452014    | 19 | 5.637  | 5.863  | 6.084  | 7.047  | 4.544  | 6.248  | 7.067  | 6.666  | 6.448  | 5.931  | 5.446  | 6.166  | 5.155  | 6.117  | 5.85   | 7.699  | 6.436  | 6.319  | 3.955  | 6.417   | 0.69009   | 0.49566 | 0.21101   | 0.23149 | 0.39301       | 0.01475 | 0.22157 | 0.51599 | 0.03798        | -0.56202 |
| Ba2g1         | Bcl2-associated athanogene 1                                                          | BG069990    | 4  | 7.388  | 6.623  | 7.069  | 7.087  | 5.954  | 7.796  | 6.784  | 6.545  | 5.666  | 6.376  | 6.718  | 6.672  | 7.183  | 6.19   | 5.558  | 6.787  | 6.691  | 6.892  | 6.662  | 0.12496 | 0.40859   | 0.49070 | 0.28886   | 0.29508 | 0.03384       | 0.04217 | 0.70532 | 0.01134 | -0.30287       |          |
| Ba2g3         | Bcl2-associated athanogene 3                                                          | BG066383    | 7  | 7.464  | 5.937  | 6.201  | 6.184  | 5.798  | 7.322  | 5.376  | 5.848  | 5.182  | 6.715  | 5.954  | 7.238  | 7.825  | 6.399  | 6.308  | 5.984  | 5.958  | 7.268  | 6.843  | 6.887   | 0.37253   | 0.43178 | 0.86369   | 0.36339 | 0.54217       | 0.01367 | 0.64453 | 0.68925 | 0.00235        | 0.13723  |
| Ba2g4         | BCL2-associated athanogene 4                                                          | BG069723    | 8  | 7.15   | 7.476  | 8.921  | 8.233  | 7.71   | 6.074  | 6.644  | 7.837  | 6.994  | 8.271  | 7.311  | 7.831  | 7.597  | 7.263  | 6.865  | 6.484  | 7.268  | 6.953  | 6.237  | 0.17351 | 0.40795   | 0.38003 | 0.26699   | 0.17351 | 0.02213       | 0.14913 | 0.48158 | 0.23470 | 1.56636        |          |
| Ba2g5         | BCL2-associated athanogene 5                                                          | BG070363    | 12 | 7.04   | 6.948  | 7.11   | 6.413  | 7.098  | 5.318  | 5.946  | 5.111  | 5.807  | 6.398  | 6.498  | 7.363  | 6.411  | 8.828  | 6.218  | 5.903  | 7.061  | 6.518  | 7.19   | 0.58837 | 0.47377   | 0.01604 | 0.18243   | 0.00052 | 0.68438       | 0.19848 | 0.49728 | 0.00371 | -0.17720       |          |
| Ba2h1c        | BAH domain and coiled-coil containing 1                                               | A1851592    | 11 | 8.775  | 7.924  | 7.919  | 8.833  | 8.286  | 8.312  | 8.175  | 8.178  | 7.612  | 8.208  | 8.185  | 8.057  | 7.969  | 8.269  | 8.617  | 8.398  | 8.296  | 8.03   | 8.44   | 8.231   | 0.63135   | 0.48291 | 0.18929   | 0.22662 | 0.31508       | 0.01603 | 0.67837 | 0.70004 | 0.09371        | 0.93079  |
| Ba2h1d        | Bromo adjacent homology domain containing 1                                           | BQ555155    | 2  | 5.171  | 6.207  | 6.559  | 5.415  | 6.496  | 6.558  | 8.278  | 5.855  | 6.106  | 6.5    | 7.95   | 6.472  | 5.7    | 4.799  | 7.711  | 5.895  | 6.15   | 6.513  | 6.744  | 0.70860 | 0.49973   | 0.91695 | 0.37468   | 0.21450 | 0.01971       | 0.77259 | 0.72206 | 0.00047 | -0.06111       |          |
| Ba1           | Brain-specific angiogenesis inhibitor 1                                               | A1847448    | 15 | 10.057 | 10.139 | 10.315 | 10.37  | 10.129 | 9.786  | 10.038 | 10.224 | 9.905  | 10.184 | 9.836  | 9.943  | 9.876  | 9.872  | 9.791  | 9.216  | 10.265 | 10.355 | 10.617 | 10.267  | 0.00089   | 0.41148 | 0.67211   | 0.32459 | 0.12513       | 0.03822 | 0.39319 | 0.59944 | 0.07431        | -0.80137 |
| Ba2           | Brain-specific angiogenesis inhibitor 2                                               | A1848719    | 4  | 11.634 | 11.586 | 11.368 | 11.381 | 11.248 | 11.566 | 11.422 | 11.337 | 11.369 | 11.362 | 11.474 | 11.744 | 11.698 | 11.545 | 11.836 | 11.453 | 11.556 | 11.494 | 11.253 | 0.12646 | 0.40850   | 0.32755 | 0.25628   | 0.70860 | 0.01328       | 0.06998 | 0.43612 | 0.45644 | -2.59188       |          |
| Ba2a1         | Brain-specific angiogenesis inhibitor 1-associated protein 2                          | A1449713    | 11 | 10.836 | 10.928 | 10.533 | 10.755 | 10.511 | 10.833 | 10.869 | 10.903 | 10.973 | 11.19  | 11.155 | 10.839 | 10.830 | 10.799 | 11.165 | 11.327 | 10.783 | 10.323 | 10.447 | 11.38   | 0.06844   | 0.41627 | 0.66678   | 0.32852 | 0.04094       | 0.13143 | 0.58087 | 0.66988 | 0.00497        | -0.19984 |
| Ba2a2         | BAI1-associated protein 2-like 1                                                      | BG072122    | 5  | 6.445  | 5.917  | 5.619  | 5.358  | 4.322  | 5.885  | 3.462  | 6.924  | 5.101  | 2.866  | 6.104  | 6.662  | 7.644  | 6.184  | 10.984 | 5.433  | 5.71   | 6      | 4.483  | 5.792   | 0.07643   | 0.41451 | 0.38883   | 0.26876 | 0.04302       | 0.01436 | 0.06430 | 0.43249 | 0.06127        | 0.72263  |
| Ba2a2         | BAI1-associated protein 2-like 2                                                      | BQ555045    | 15 | 4.272  | 5.018  | 5.24   | 4.794  | 5.465  | 5.17   | 4.591  | 5.282  | 5.441  | 6.325  | 3.937  | 6.003  | 4.433  | 5.728  | 5.92   | 6.361  | 5.429  | 7.214  | 4.543  | 0.53379 | 0.46335   | 0.19035 | 0.22686   | 0.58273 | 0.01353       | 0.14132 | 0.47738 | 0.01503 | -0.34943       |          |
| Ba2k1         | BCL2-antagonist/killer 1                                                              | BQ837675    | 17 | 2.367  | 5.706  | 6.44   | 7.761  | 6.656  | 5.258  | 6.776  | 6.835  | 7.898  | 6.066  | 7.007  | 6.833  | 6.551  | 7.234  | 7.435  | 6.479  | 6.509  | 6.561  | 7.418  | 0.91832 | 0.54643   | 0.73853 | 0.33783   | 0.88489 | 0.01335       | 0.83527 | 0.73603 | 0.13646 | -1.12437       |          |
| Bambi         | BMP and activin membrane-bound inhibitor, homolog (Xenopus laevis)                    | A1450743    | 18 | 9.555  | 9.206  | 9.189  | 8.991  | 9.755  | 10.06  | 10.271 | 10.174 | 9.225  | 9.891  | 9.208  | 10.005 | 10.429 | 9.619  | 10.283 | 9.635  | 10.004 | 9.025  | 9.502  | 9.83    | 0.17871   | 0.40813 | 0.22958   | 0.23559 | 0.12148       | 0.03519 | 0.86784 | 0.74290 | 0.24866        | 1.62714  |
| BanF1         | Barrier to autointegration factor 1                                                   | BG073309    | 19 | 9.896  | 9.07   | 9.247  | 8.847  | 9.015  | 10.08  | 9.445  | 9.192  | 9.174  | 9.719  | 8.93   | 9.177  | 9.552  | 8.838  | 8.862  | 9.27   | 8.925  | 9.281  | 9.335  | 9.352   | 0.54404   | 0.46462 | 0.16289   | 0.22067 | 0.25388       | 0.01782 | 0.16709 | 0.49121 | 0.00838        | 0.25996  |
| Bank1         | B-cell scaffold protein with ankyrin repeats 1                                        | A1451642    | 3  | 6.795  | 7.03   | 7.601  | 6.685  | 6.633  | 4.597  | 3.955  | 4.321  | 4.31   | 6.427  | 7.391  | 5.893  | 7.495  | 7.656  | 7.219  | 6.207  | 6.076  | 6.802  | 6.763  | 0.62997 | 0.4       |         |           |         |               |         |         |         |                |          |
